# Supplementary material for: Efficient net transfer-dehydrogenation of glycerol: NNN pincer–Mn and manganese chloride as a catalyst unlocks the effortless production of lactic acid and isopropanol
Source: Royal Society of Chemistry journal article supplement (doi:10.1039/d4dt01731e), 2024-01-01
Supplement: d4dt01731e1.pdf [file d4dt01731e1.pdf]

## Supporting Information

# **Efficient net transfer-dehydrogenation of glycerol: NNN pincer-Mn and manganese chloride as a catalyst unlocks the effortless production of lactic acid and isopropanol**

Akshara Bisarya,<sup>a</sup> Sunil Dhole<sup>b</sup> and Akshai Kumar<sup>a,c,d</sup>

<sup>a</sup>Department of Chemistry, Indian Institute of Technology Guwahati, Guwahati-781039, Assam, India

<sup>b</sup>ChemDist Group of Companies, Plot No 144A, Sector 7, PCNTDA Bhosari Pune-411026, Maharashtra India.

<sup>c</sup>Centre for Nanotechnology, Indian Institute of Technology Guwahati, Guwahati-781039, Assam, India

<sup>d</sup>Jyoti and Bhpat Mehta School of Health Science & Technology, Indian Institute of Technology Guwahati, Guwahati, Assam, India

Email: [akshaikumar@iitg.ac.in](mailto:akshaikumar@iitg.ac.in)

| <b>Table of Contents</b> |                                | <b>Page</b> |
|--------------------------|--------------------------------|-------------|
| <b>1.</b>                | <b>XRD Analysis</b>            | S2-S4       |
| <b>2.</b>                | <b>Magnetic Moment Studies</b> | S5          |
| <b>3.</b>                | <b>HRMS Simulation</b>         | S5-S15      |
| <b>4.</b>                | <b>GC Analysis</b>             | S15-S17     |
| <b>5.</b>                | <b>Kinetic Studies</b>         | S18         |
| <b>6.</b>                | <b>NMR Spectra</b>             | S19-44      |

## 1. X-ray Analysis

**Table S1. Crystal data and refinement parameter of 6a and 6b**

| Complex                                     | 6a                                                               | 6b                                                               |
|---------------------------------------------|------------------------------------------------------------------|------------------------------------------------------------------|
| Empirical formula                           | C <sub>16</sub> H <sub>25</sub> Cl <sub>4</sub> MnN <sub>3</sub> | C <sub>13</sub> H <sub>19</sub> Cl <sub>2</sub> MnN <sub>3</sub> |
| Formula weight                              | 456.13                                                           | 343.15                                                           |
| Temperature/K                               | 296(2)                                                           | 295.00                                                           |
| Crystal system                              | monoclinic                                                       | monoclinic                                                       |
| Space group                                 | P2 <sub>1</sub> /c                                               | P2 <sub>1</sub> /n                                               |
| a/Å                                         | 9.8115(11)                                                       | 11.2911(13)                                                      |
| b/Å                                         | 14.4759(15)                                                      | 12.0182(14)                                                      |
| c/Å                                         | 16.0170(18)                                                      | 12.2882(15)                                                      |
| α/°                                         | 90                                                               | 90                                                               |
| β/°                                         | 102.785(3)                                                       | 104.003(3)                                                       |
| γ/°                                         | 90                                                               | 90                                                               |
| Volume/Å <sup>3</sup>                       | 2218.5(4)                                                        | 1617.9(3)                                                        |
| Z                                           | 4                                                                | 4                                                                |
| ρ <sub>calc</sub> /g/cm <sup>3</sup>        | 1.366                                                            | 1.409                                                            |
| μ/mm <sup>-1</sup>                          | 1.080                                                            | 1.136                                                            |
| F(000)                                      | 940.0                                                            | 708.0                                                            |
| Crystal size/mm <sup>3</sup>                | 0.36 × 0.28 × 0.23                                               | 0.33 × 0.28 × 0.21                                               |
| Radiation                                   | MoKα (λ = 0.71073)                                               | MoKα (λ = 0.71073)                                               |
| 2θ range for data collection/°              | 4.256 to 52.788                                                  | 4.398 to 54.248                                                  |
| Index ranges                                | -12 ≤ h ≤ 12, -18 ≤ k ≤ 18, -20 ≤ l ≤ 20                         | -14 ≤ h ≤ 14, -15 ≤ k ≤ 15, -15 ≤ l ≤ 15                         |
| Reflections collected                       | 38668                                                            | 40218                                                            |
| Independent reflections                     | 4520 [R <sub>int</sub> = 0.0343, R <sub>sigma</sub> = 0.0211]    | 3560 [R <sub>int</sub> = 0.0396, R <sub>sigma</sub> = 0.0201]    |
| Data/restraints/parameters                  | 4520/154/264                                                     | 3560/24/188                                                      |
| Goodness-of-fit on F <sup>2</sup>           | 1.073                                                            | 1.114                                                            |
| Final R indexes [I >= 2σ (I)]               | R <sub>1</sub> = 0.0442, wR <sub>2</sub> = 0.0880                | R <sub>1</sub> = 0.0409, wR <sub>2</sub> = 0.0824                |
| Final R indexes [all data]                  | R <sub>1</sub> = 0.0589, wR <sub>2</sub> = 0.0978                | R <sub>1</sub> = 0.0580, wR <sub>2</sub> = 0.0925                |
| Largest diff. peak/hole / e Å <sup>-3</sup> | 0.41/-0.34                                                       | 0.28/-0.34                                                       |

**Table S2. Selected bond lengths and bond angles around metal (Mn) centre**

| Complex                     | 6a                      | Complex                     | 6b                      |
|-----------------------------|-------------------------|-----------------------------|-------------------------|
| Mn–N (Å) (Pyridine)         | 2.185(2)                | Mn–N (Å) (Pyridine)         | 2.191(2)                |
| Mn–N (imine) (Å)            | 2.391(2), 2.396(2)      | Mn–N (imine) (Å)            | 2.332(3), 2.368(2)      |
| Mn–Cl (Å)                   | 2.3337(9),<br>2.3595(8) | Mn–Cl (Å)                   | 2.3394(8),<br>2.3464(9) |
| (Imine)N–Mn–N(Imine) (°)    | 142.16(8)               | (Imine)N–Mn–N(Imine) (°)    | 141.94(8)               |
| (Imine)N–Mn–N(pyridine) (°) | 71.48(8), 71.23(7)      | (Imine)N–Mn–N(pyridine) (°) | 71.42(9),<br>71.05(8)   |

**Table S3. Crystal data and refinement parameter of 6c and 6d**

| Complex                                     | 6c                                                               | 6d                                                               |
|---------------------------------------------|------------------------------------------------------------------|------------------------------------------------------------------|
| Empirical formula                           | C <sub>19</sub> H <sub>26</sub> Cl <sub>2</sub> MnN <sub>3</sub> | C <sub>19</sub> H <sub>15</sub> Cl <sub>2</sub> MnN <sub>3</sub> |
| Formula weight                              | 422.27                                                           | 411.18                                                           |
| Temperature/K                               | 298.00                                                           | 296.15                                                           |
| Crystal system                              | monoclinic                                                       | monoclinic                                                       |
| Space group                                 | P2 <sub>1</sub> /c                                               | C2/c                                                             |
| a/Å                                         | 7.7457(18)                                                       | 7.6526(10)                                                       |
| b/Å                                         | 15.224(4)                                                        | 17.402(2)                                                        |
| c/Å                                         | 17.898(4)                                                        | 13.8792(17)                                                      |
| α/°                                         | 90                                                               | 90                                                               |
| β/°                                         | 100.367(6)                                                       | 98.775(4)                                                        |
| γ/°                                         | 90                                                               | 90                                                               |
| Volume/Å <sup>3</sup>                       | 2076.1(8)                                                        | 1826.7(4)                                                        |
| Z                                           | 4                                                                | 4                                                                |
| ρ <sub>calc</sub> /g/cm <sup>3</sup>        | 1.351                                                            | 1.495                                                            |
| μ/mm <sup>-1</sup>                          | 0.900                                                            | 1.021                                                            |
| F(000)                                      | 880.0                                                            | 836.0                                                            |
| Crystal size/mm <sup>3</sup>                | 0.32 × 0.24 × 0.21                                               | 0.36 × 0.28 × 0.24                                               |
| Radiation                                   | MoKα (λ = 0.71073)                                               | MoKα (λ = 0.71073)                                               |
| 2θ range for data collection/°              | 5.346 to 51.274                                                  | 5.544 to 50.812                                                  |
| Index ranges                                | -9 ≤ h ≤ 9, -18 ≤ k ≤ 18, -21 ≤ l ≤ 21                           | -9 ≤ h ≤ 9, -20 ≤ k ≤ 20, -16 ≤ l ≤ 16                           |
| Reflections collected                       | 48767                                                            | 21648                                                            |
| Independent reflections                     | 3913 [R <sub>int</sub> = 0.0300, R <sub>sigma</sub> = 0.0137]    | 1691 [R <sub>int</sub> = 0.0381, R <sub>sigma</sub> = 0.0212]    |
| Data/restraints/parameters                  | 3913/15/281                                                      | 1691/0/115                                                       |
| Goodness-of-fit on F <sup>2</sup>           | 1.061                                                            | 1.109                                                            |
| Final R indexes [I >= 2σ (I)]               | R <sub>1</sub> = 0.0359, wR <sub>2</sub> = 0.0846                | R <sub>1</sub> = 0.0353, wR <sub>2</sub> = 0.0670                |
| Final R indexes [all data]                  | R <sub>1</sub> = 0.0464, wR <sub>2</sub> = 0.0948                | R <sub>1</sub> = 0.0453, wR <sub>2</sub> = 0.0718                |
| Largest diff. peak/hole / e Å <sup>-3</sup> | 0.29/-0.26                                                       | 0.35/-0.35                                                       |

**Table S4. Selected bond lengths and bond angles around metal (Mn) centre**

| <b>Complex</b>                  | <b>6c</b>               | <b>Complex</b>                  | <b>6d</b>               |
|---------------------------------|-------------------------|---------------------------------|-------------------------|
| Mn–N (Å) (Pyridine)             | 2.1991(18)              | Mn–N (Å) (Pyridine)             | 2.194(3)                |
| Mn–N (imine) (Å)                | 2.3618(18),<br>2.412(2) | Mn–N (imine) (Å)                | 2.359(2), 2.359(2)      |
| Mn–Cl (Å)                       | 2.3346(9),<br>2.3400(8) | Mn–Cl (Å)                       | 2.3324(8),<br>2.3325(7) |
| (Imine)N–Mn–<br>N(Imine) (°)    | 141.85(7)               | (Imine)N–Mn–<br>N(Imine) (°)    | 142.04(10)              |
| (Imine)N–Mn–<br>N(pyridine) (°) | 71.60(6), 70.26(7)      | (Imine)N–Mn–<br>N(pyridine) (°) | 71.02(5),<br>71.02(5)   |

## 2. Magnetic Moment Studies

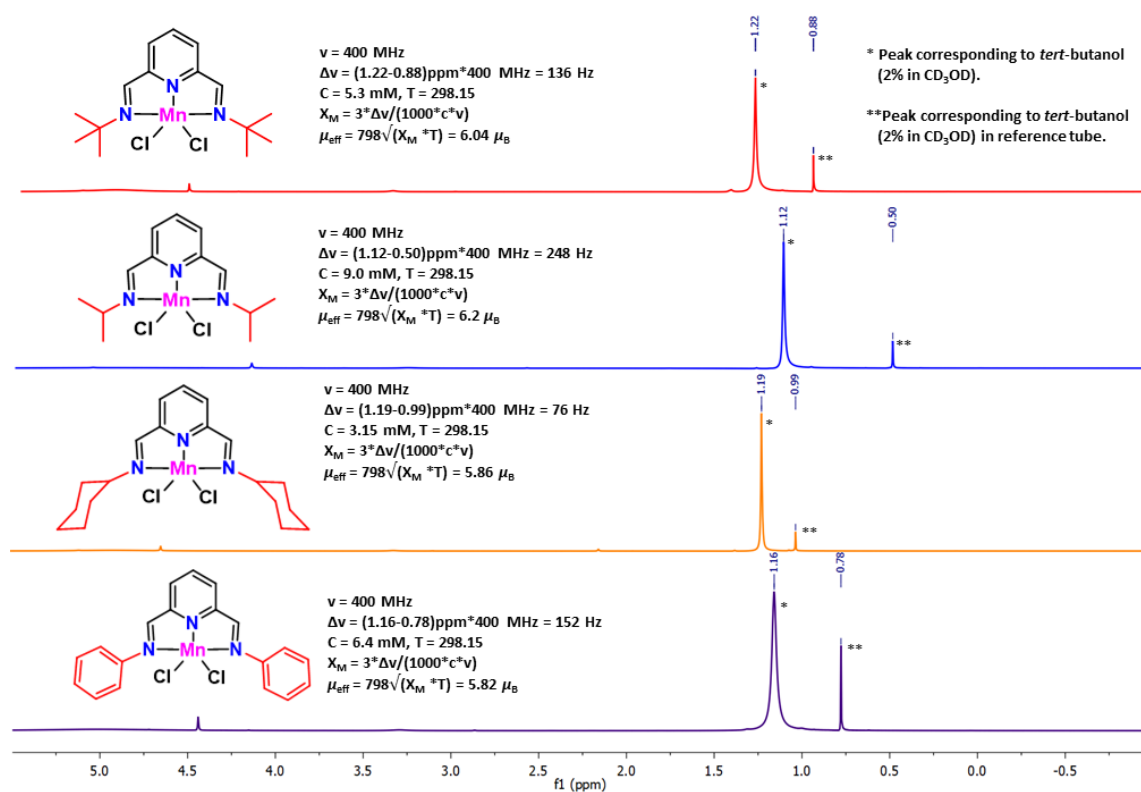

**Figure S1.** Determination of magnetic of  $R^2\text{NNNMnCl}_2$  complexes using Evan's method in CD<sub>3</sub>OD.

## 3. HRMS analysis

### 3.1 HRMS analysis of 6a

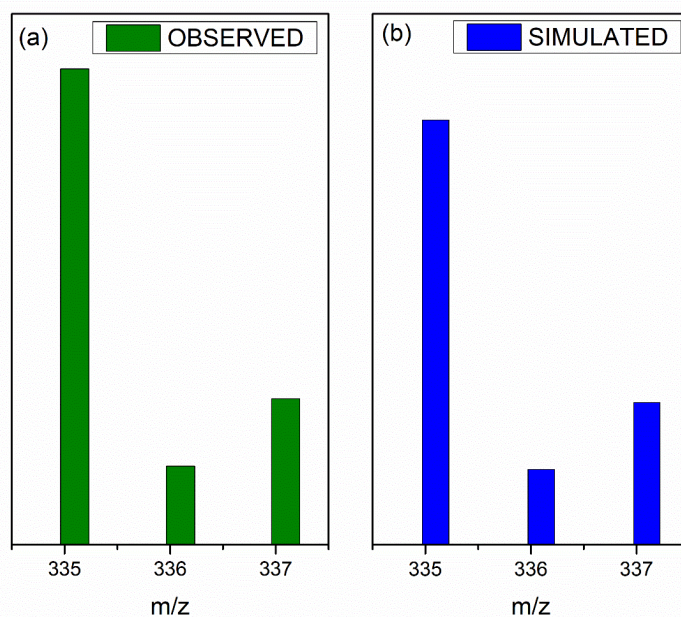

**Figure S2.** HRMS(ESI) analysis of **6a** at  $m/z$  value (a) 335.0952 (b) 335.0961

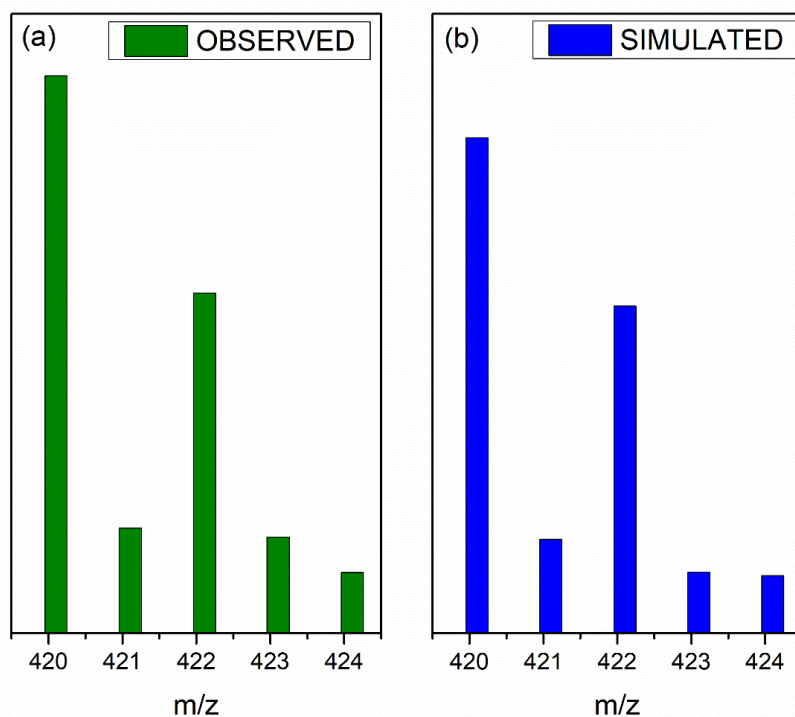

**Figure S3.** HRMS(ESI) analysis of **6a** at  $m/z$  value (a) 420.1035 (b) 420.1017.

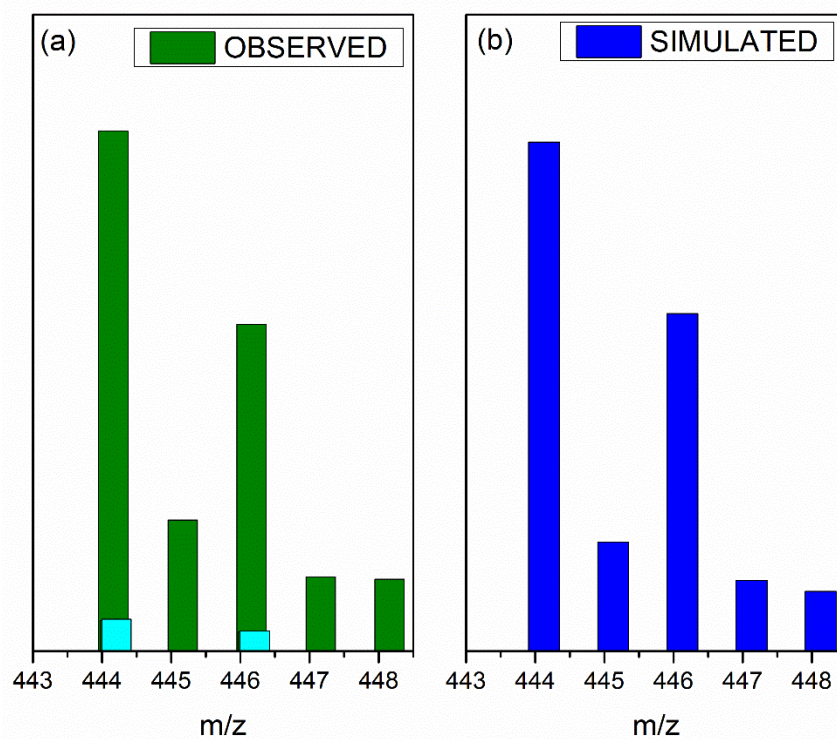

**Figure S4.** HRMS(ESI) analysis of **6a** at  $m/z$  value (a) 444.1613 (b) 444.1255.

### 3.2 HRMS analysis of **6b**

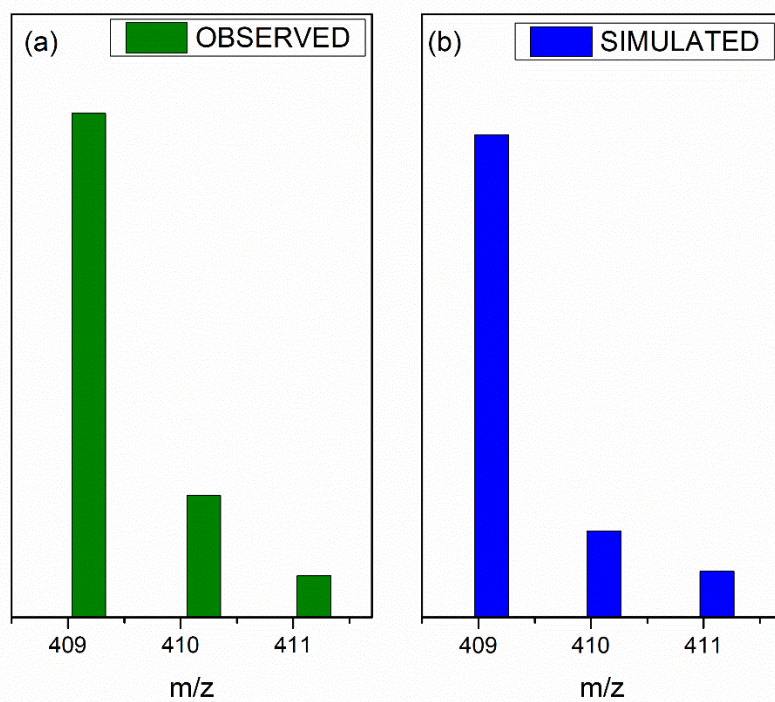

**Figure S5.** HRMS(ESI) analysis of **6b** at m/z value (a) 409.1851 (b) 409.1176.

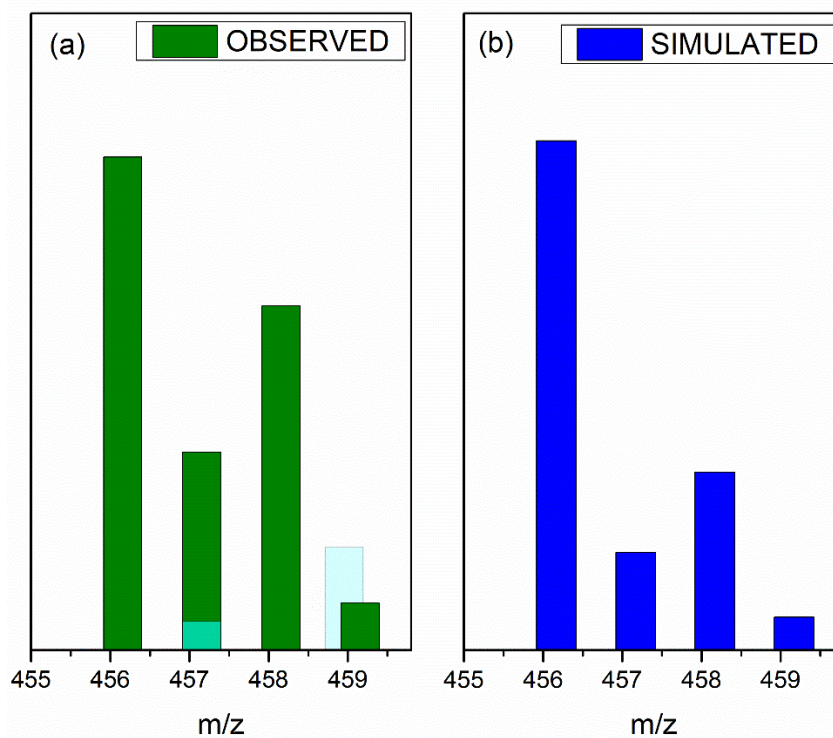

**Figure S6.** HRMS(ESI) analysis of **6b** at m/z value (a) 456.1558 (b) 456.1673.

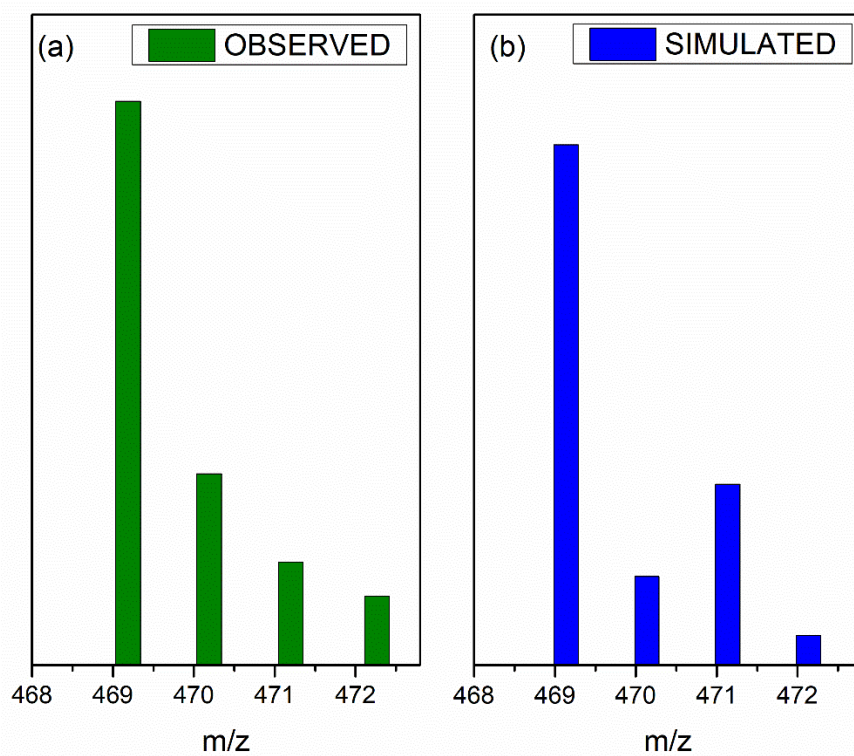

**Figure S7.** HRMS(ESI) analysis of **6b** at m/z value (a) 469.1875 (b) 469.1363.

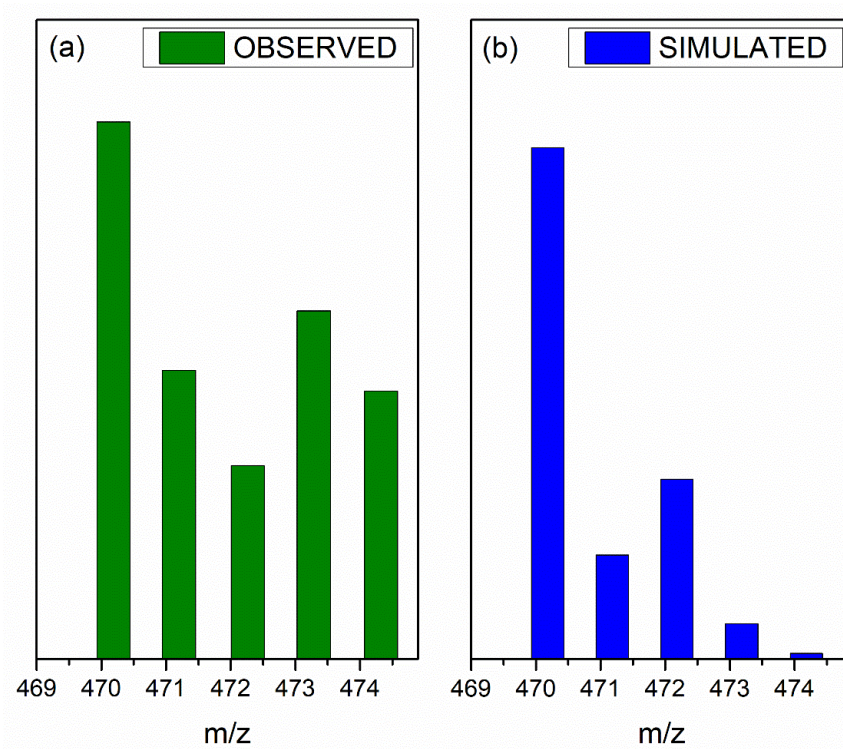

**Figure S8.** HRMS(ESI) analysis of **6b** at m/z value (a) 470.1889 (b) 470.1830.



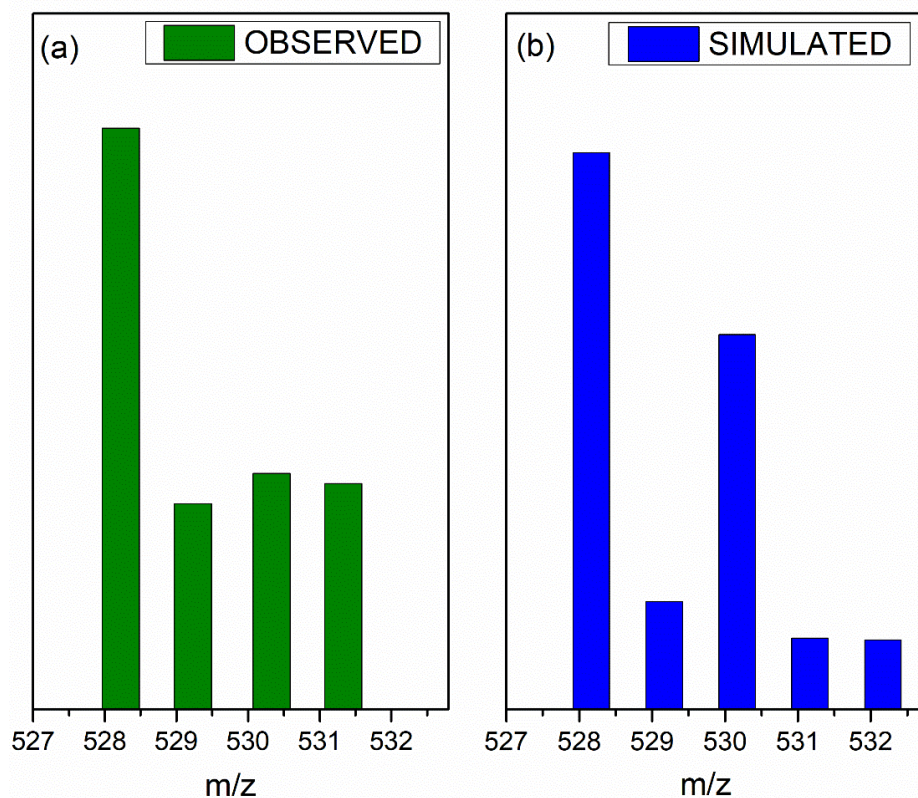

**Figure S9.** HRMS(ESI) analysis of **6b** at m/z value (a) 528.2246 (b) 528.1651.

### 3.3 HRMS analysis of 6c

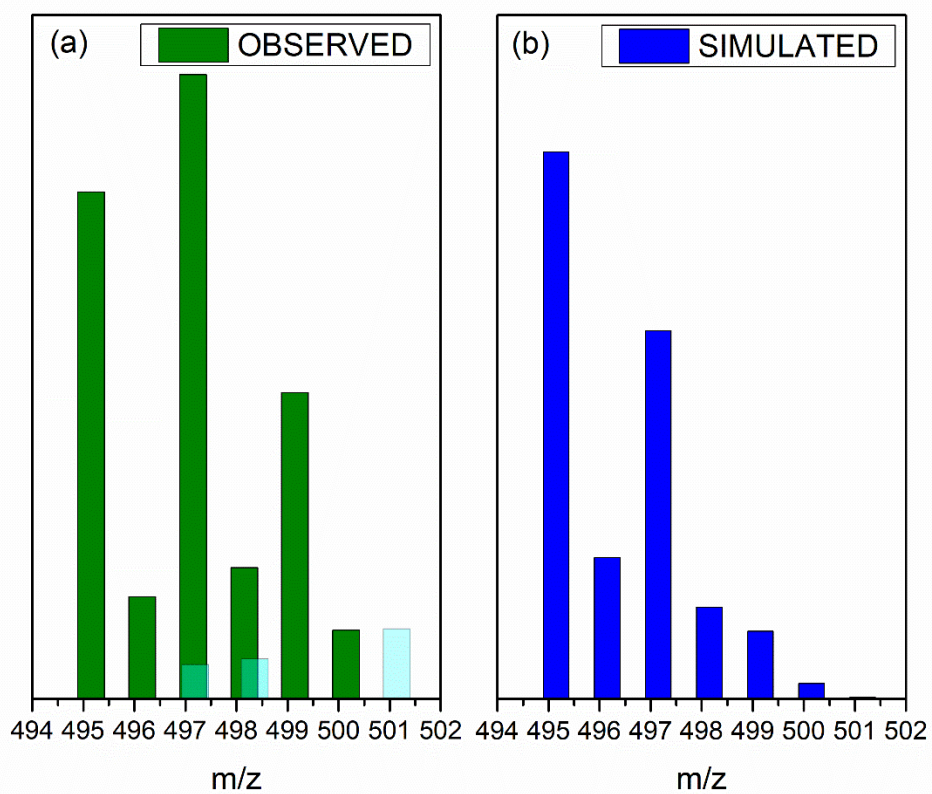

**Figure S10.** HRMS(ESI) analysis of **6c** at m/z value (a) 495.1508 (b) 495.1490.

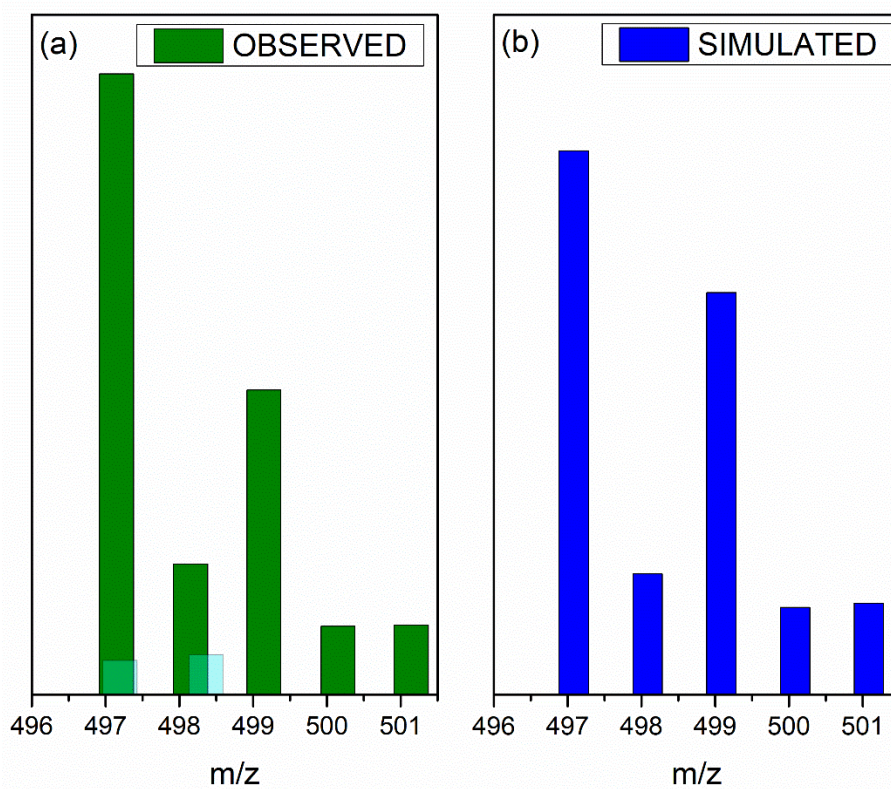

**Figure S11.** HRMS(ESI) analysis of **6c** at m/z value (a) 497.1478 (b) 497.0811.

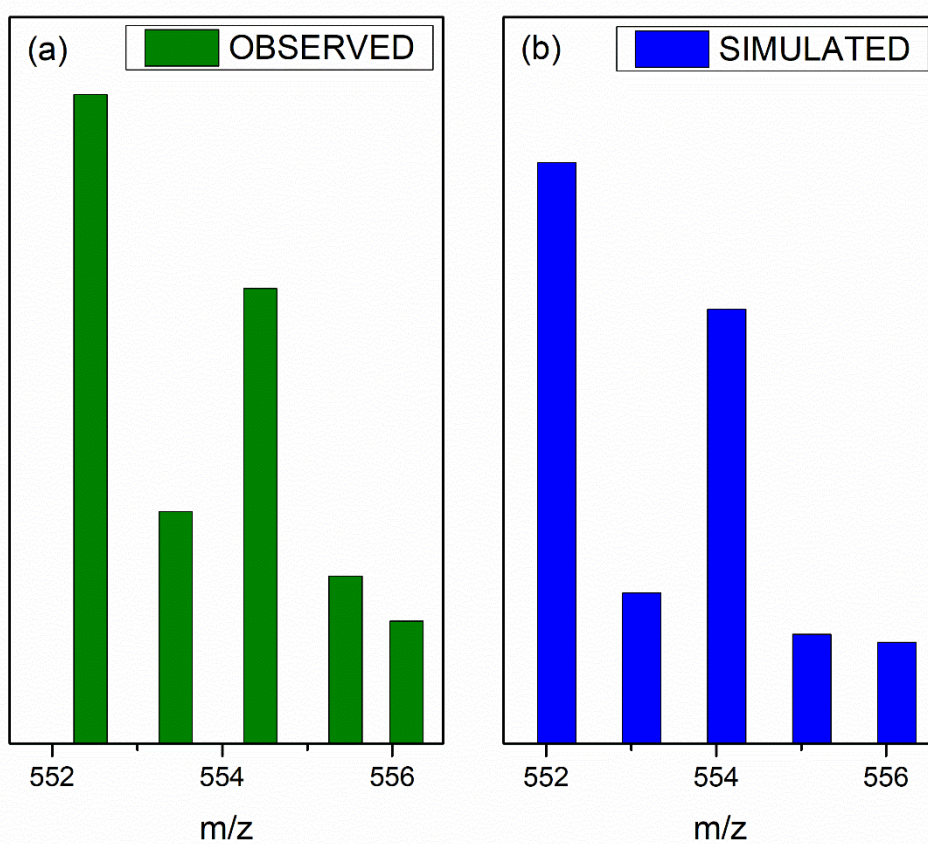

**Figure S12.** HRMS(ESI) analysis of **6c** at m/z value (a) 522.4487 (b) 522.1698.

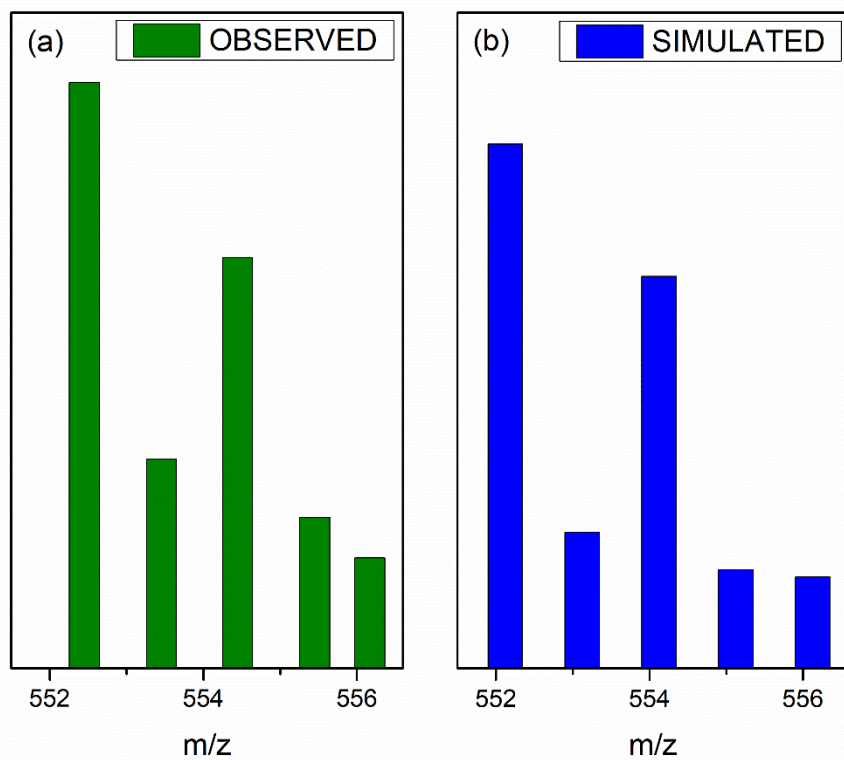

**Figure S13.** HRMS(ESI) analysis of **6c** at m/z value (a) 552.4487 (b) 552.1233.

### 3.4 HRMS analysis of 6d

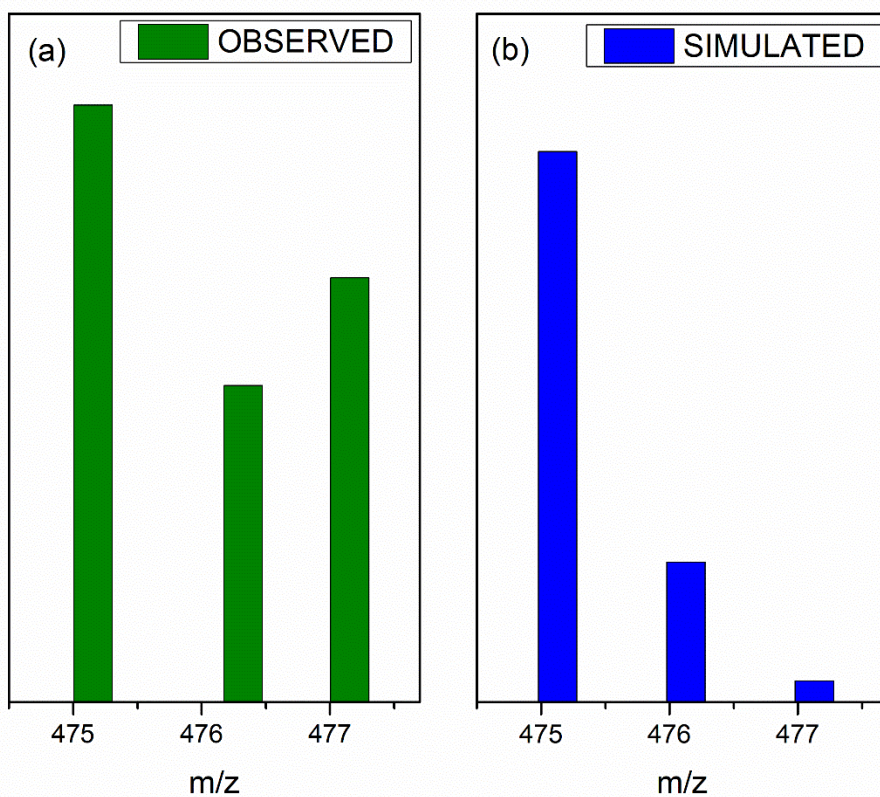

**Figure S14.** HRMS(ESI) analysis of **6d** at m/z value (a) 475.3258 (b) 475.1280.

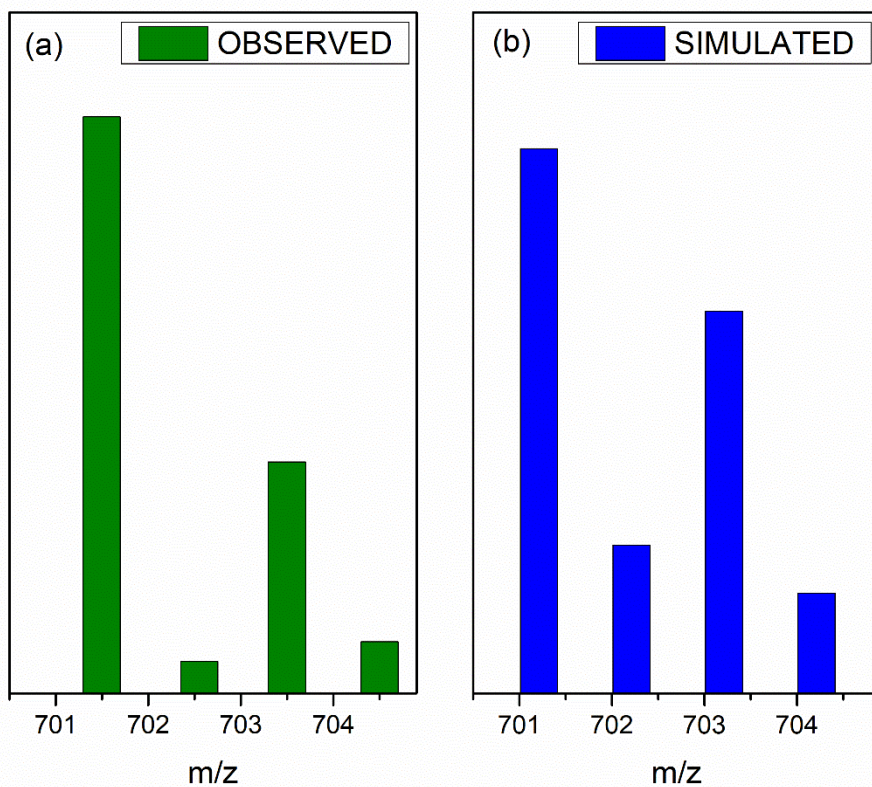

**Figure S15.** HRMS(ESI) analysis of **6d** at m/z value (a) 701.4941 (b) 701.2101.

### 3.5 HRMS analysis of reaction mixture

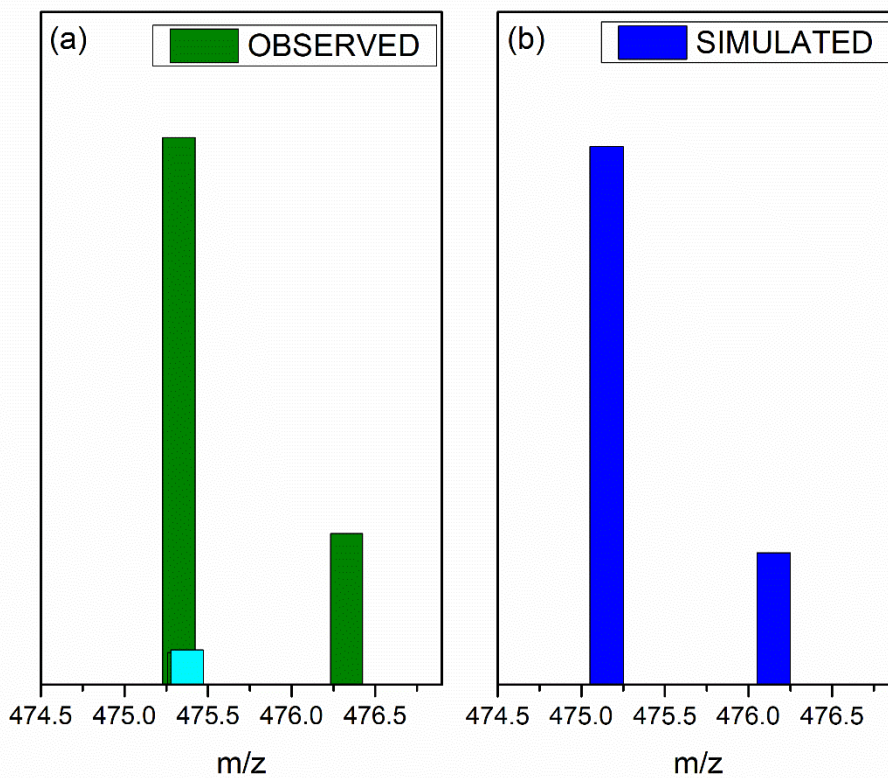

**Figure S16.** HRMS(ESI) analysis of reaction mixture at t =0h at m/z value (a) 475.3260 (b) 475.1515.

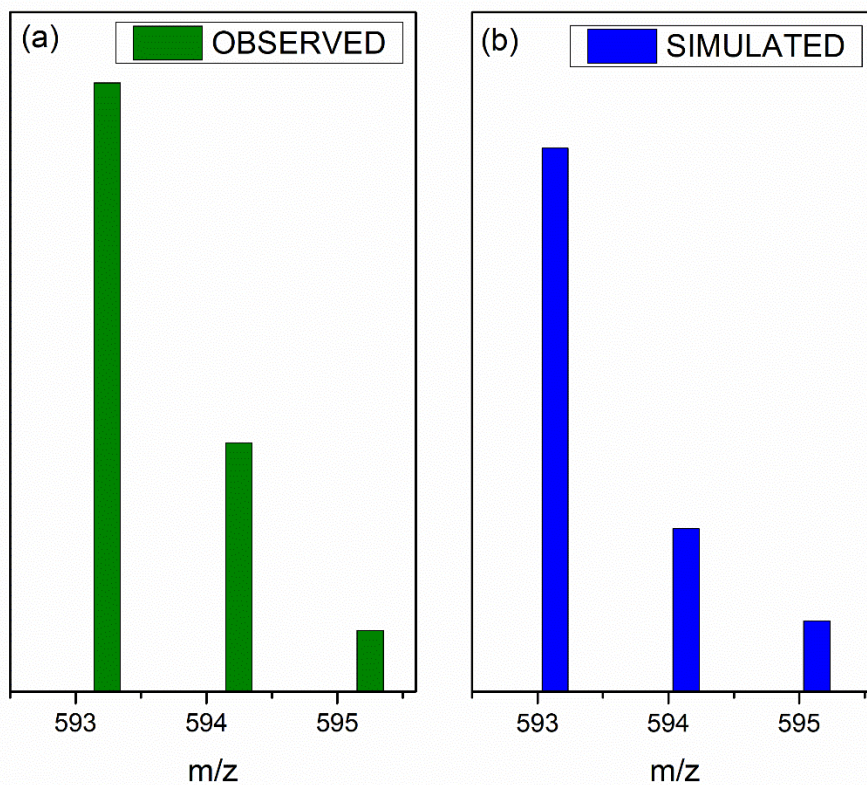

**Figure S17.** HRMS(ESI) analysis of reaction mixture at  $t = 0\text{h}$  at  $m/z$  value (a) 593.2429 (b) 593.1336.

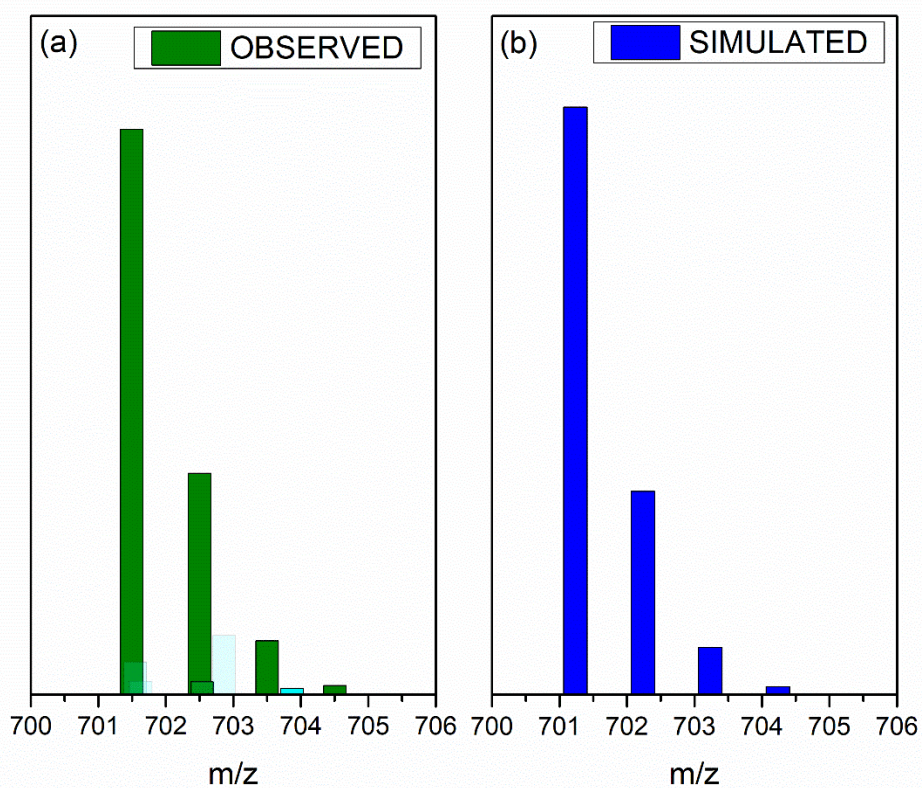

**Figure S18.** HRMS(ESI) analysis of reaction mixture at  $t = 0\text{h}$  at  $m/z$  value (a) 701.4939 (b) 701.2332.

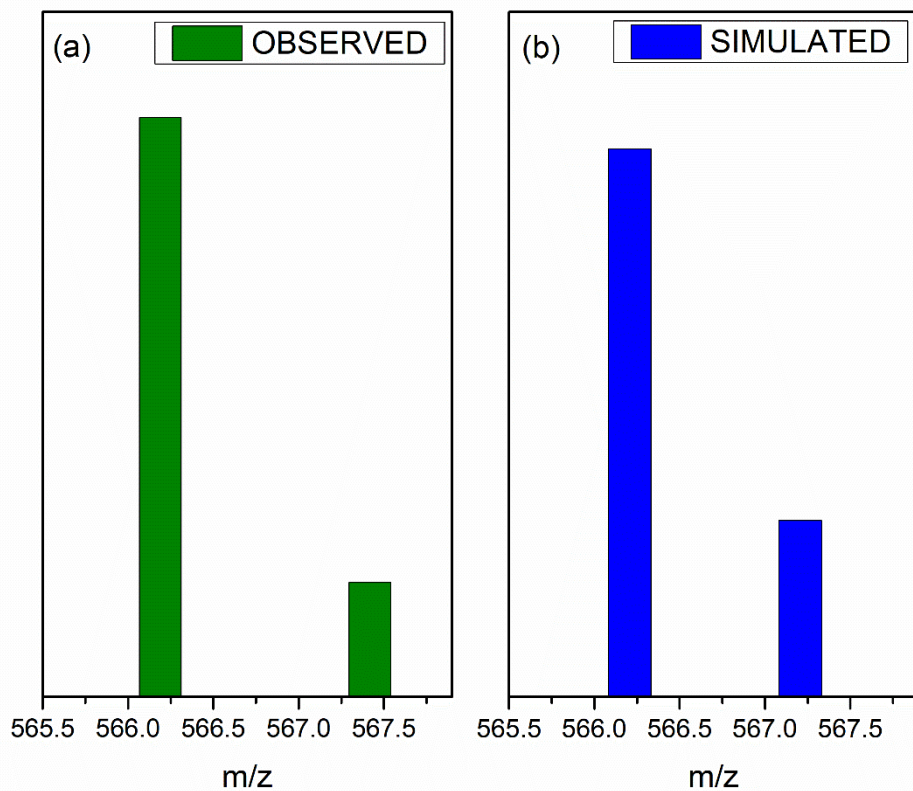

**Figure S19.** HRMS(ESI) analysis of reaction mixture at t =1h at m/z value (a) 566.8893 (b) 566.2063.

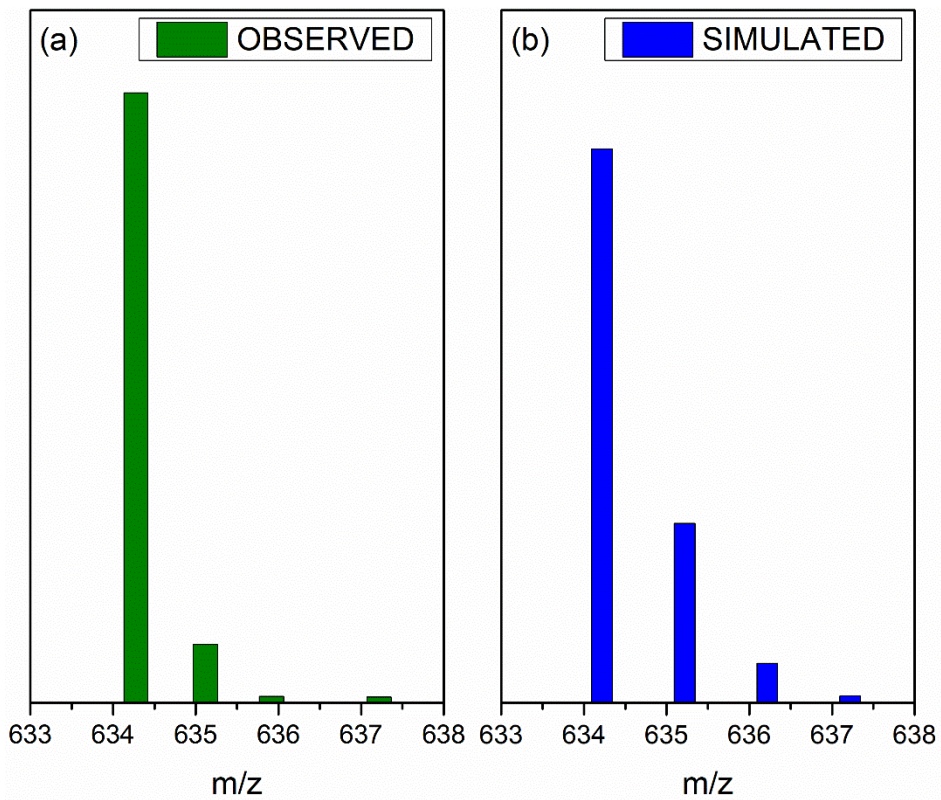

**Figure S20.** HRMS(ESI) analysis of reaction mixture at t =1h at m/z value (a) 634.8765 (b) 634.2172.

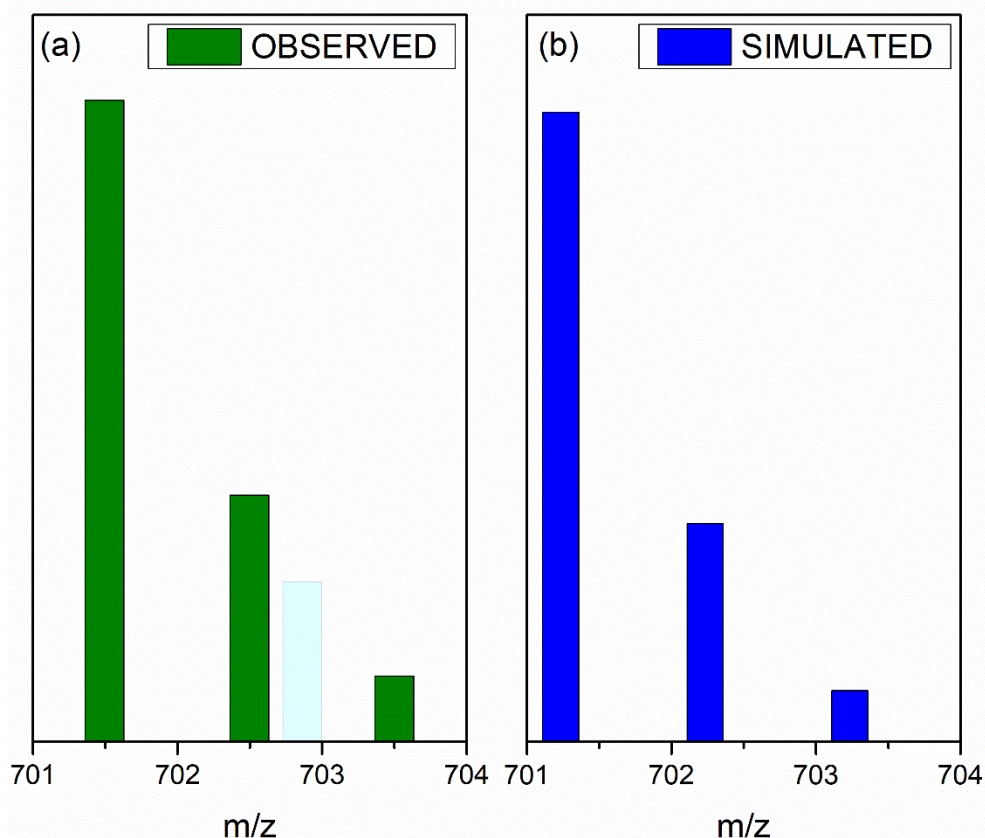

**Figure S21.** HRMS(ESI) analysis of reaction mixture at  $t = 1\text{h}$  at  $m/z$  value (a) 701.4939 (b) 701.2332.

#### 4. GC analysis

GC analysis (TCD detection) was performed on an Agilent 7820-GC instrument fitted with Agilent Front SSZ Inlet  $\text{N}_2$  HP-PLOT Q column (30 m length x 530  $\mu\text{m}$  x 40  $\mu\text{m}$ ) using the following method:

Agilent 7820-GC back detector TCD

Oven temperature: 50 °C

Time at starting temp: 0 min

Hold time = 10 min

Inlet temperature: 100 °C

Detector temperature (TCD): 250 °C

Detector temperature (FID): 300 °C

Flow rate (carrier): 5 mL/min ( $\text{N}_2$ )

Split ratio: 10

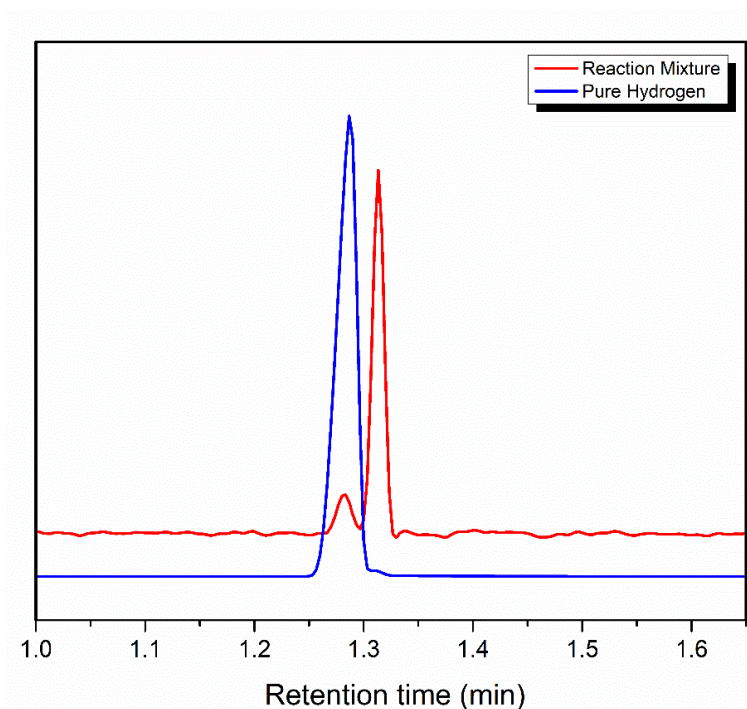

**Figure S22.** Evidence for H<sub>2</sub> evolution in the transfer dehydrogenation of glycerol **7** using acetophenone **8a** as acceptor, catalyzed by **6d** (0.5 mol%) and NaOH (1 equivalent) at 140 °C via GC analysis. (Entry 1, Table 2)

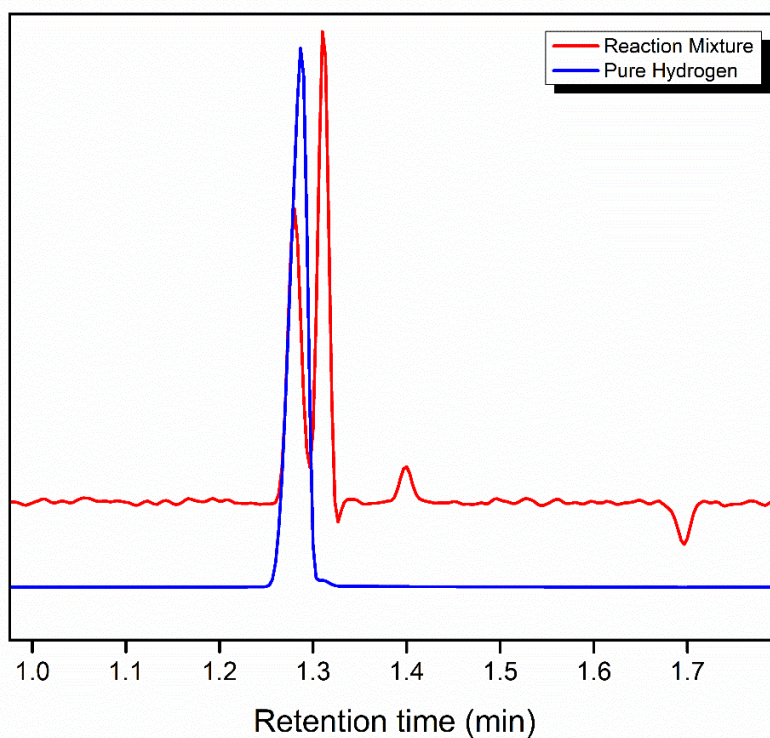

**Figure S23.** Evidence for H<sub>2</sub> evolution in the transfer dehydrogenation of glycerol **7** using 4-Bromoacetophenone **8f** as acceptor, catalyzed by **6d** (0.5 mol%) and NaOH (1 equivalent) at 140 °C via GC analysis. (Entry 6, Table 2)



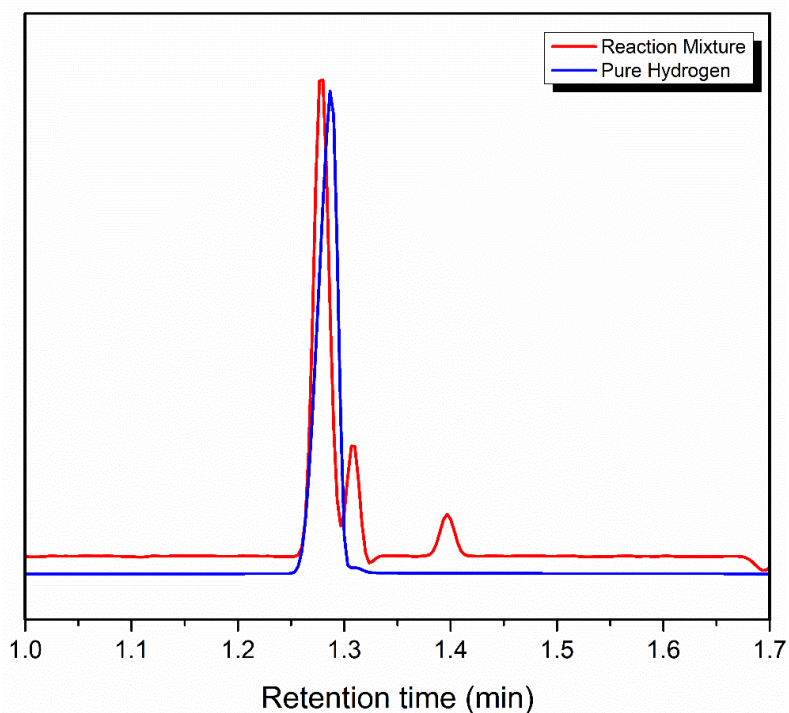

**Figure S24.** Evidence for H<sub>2</sub> evolution in the transfer dehydrogenation of glycerol **7** using 4-acetylpyridine **8j** as acceptor, catalyzed by **6d** (0.5 mol%) and NaOH (1 equivalent) at 140 °C via GC analysis. (Entry 10, Table 2)

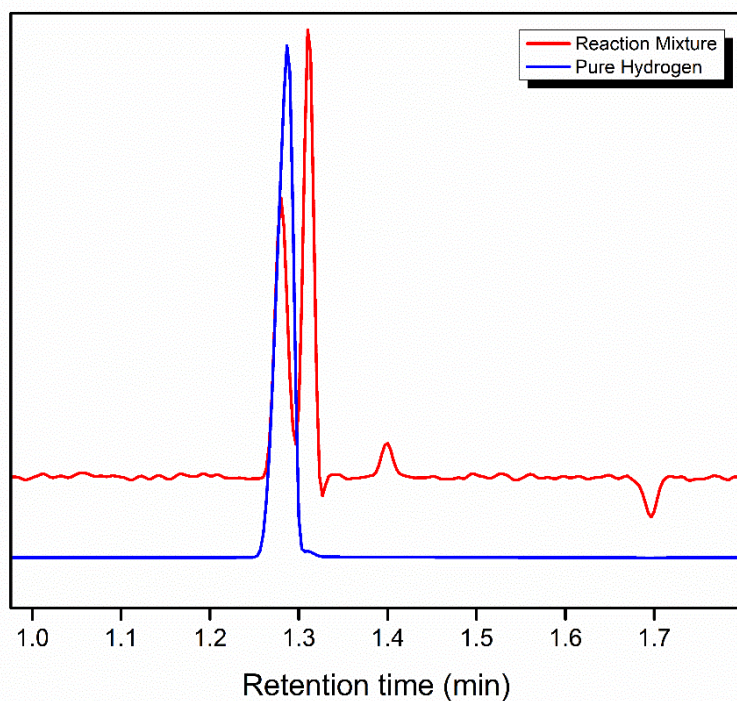

**Figure S24.** Evidence for H<sub>2</sub> evolution in the transfer dehydrogenation of glycerol **7** using *tert*-butylacetophenone **8l** as acceptor, catalyzed by **6d** (0.5 mol%) and NaOH (1 equivalent) at 140 °C via GC analysis. (Entry 12, Table 2)

## 5. Kinetic studies

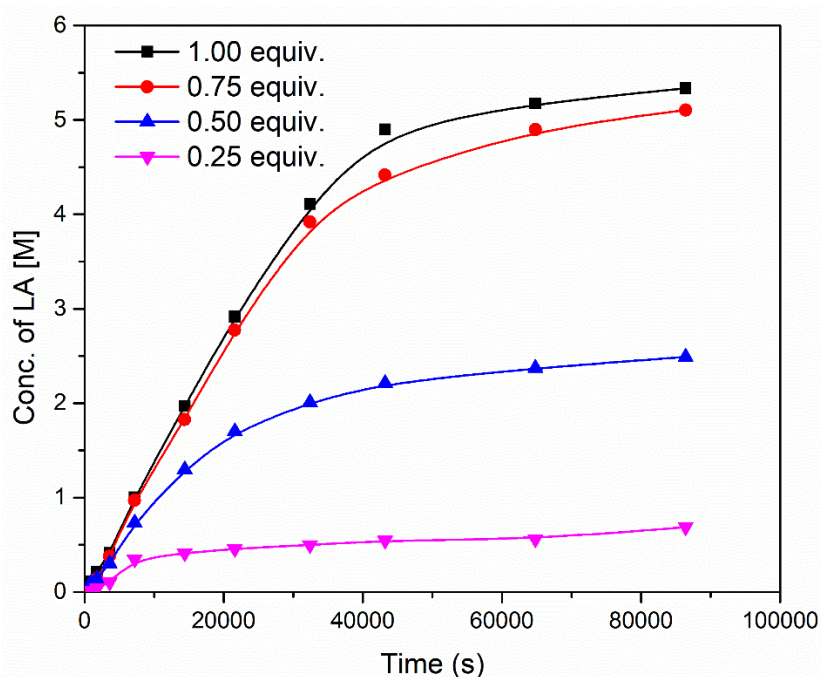

**Figure S26.** Time profile of formation of LA with concentration of NaOH (Reaction condition: Glycerol (**7**) (0.460 g, 5.0 mmol), **8** (372  $\mu$ L, 5 mmol), NaOH (0.050 g (1.25 mmol), 0.100 (2.5 mmol), 0.150 g (3.75 mmol), 0.200 g (5.0 mmol) and **6d** (0.010 g, 0.025 mmol) at 140  $^{\circ}$ C for 24 h in closed-vessel condition.

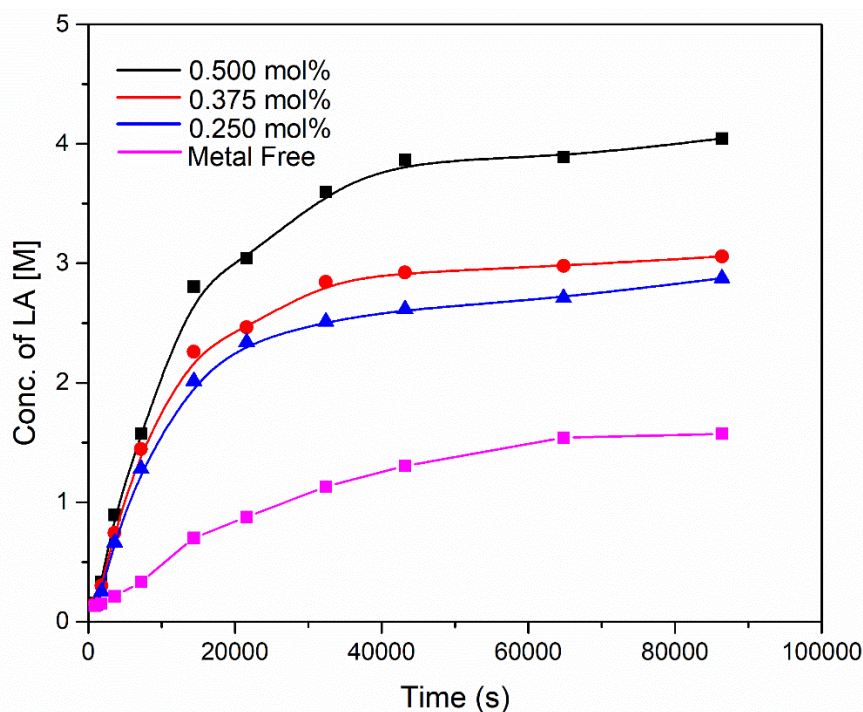

**Figure S27.** Time profile of formation of LA with concentration of **6d** (Reaction condition: Glycerol (**7**) (0.460 g, 5.0 mmol), **8** (372  $\mu$ L, 5 mmol), 100  $\mu$ L of water, NaOH (0.200 g (5.0 mmol) and **6d** (0.010 g, 0.025 mmol), (0.007 g, 0.018 mmol), (0.005 g, 0.0125 mmol) and in metal free condition at 140  $^{\circ}$ C for 24 h in closed-vessel condition.

## 6. NMR Spectra

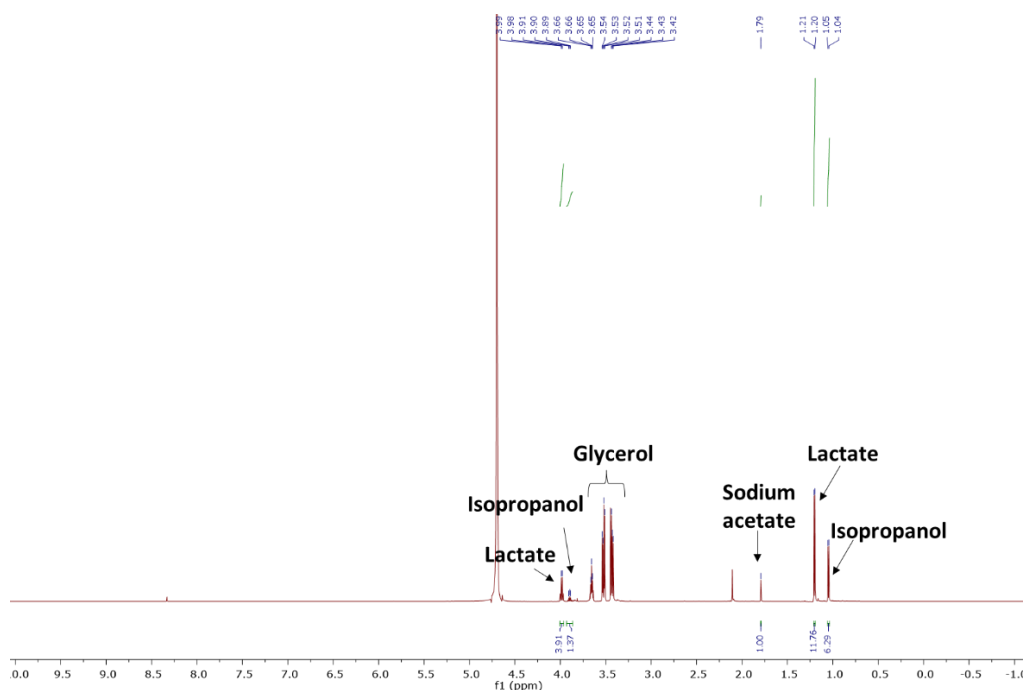

**Figure S28.** <sup>1</sup>H NMR spectrum of glycerol (**7**) dehydrogenation to lactate (**9**) using acetone (**8**) as acceptor, catalyzed by MnCl<sub>2</sub>·4H<sub>2</sub>O (0.5 mol%), KOH (1 equiv.) at 140 °C in D<sub>2</sub>O. (Entry 1, Table 1)

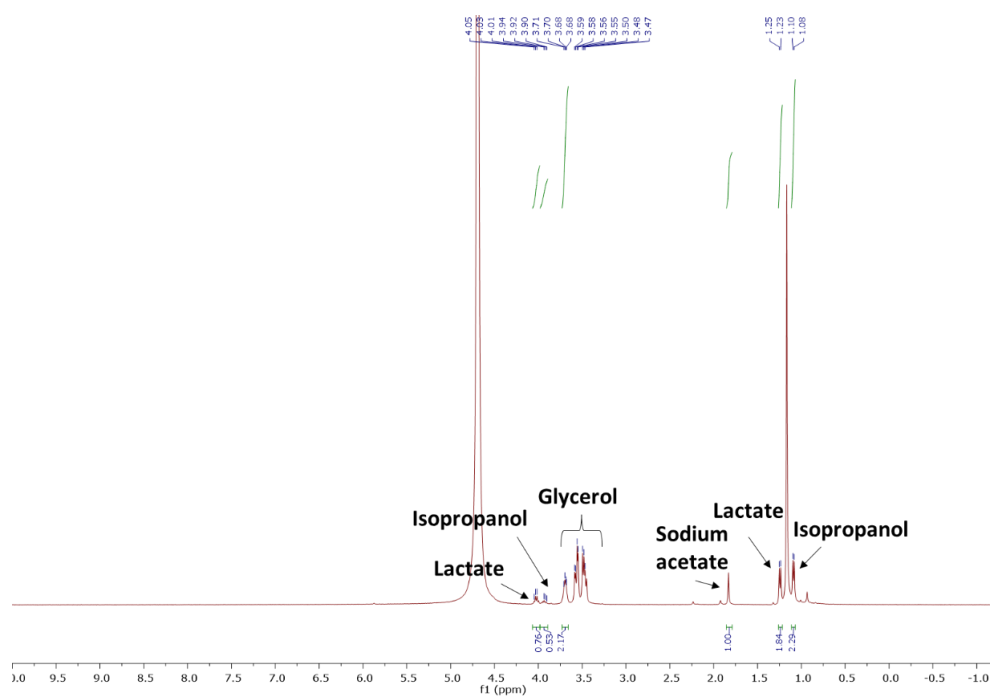

**Figure S29.** <sup>1</sup>H NMR spectrum of glycerol (**7**) dehydrogenation to lactate (**9**) using acetone (**8**) as acceptor, catalyzed by MnCl<sub>2</sub>·4H<sub>2</sub>O (0.5 mol%), NaO'Bu (1 equiv.) at 140 °C in D<sub>2</sub>O. (Entry 2, Table 1)

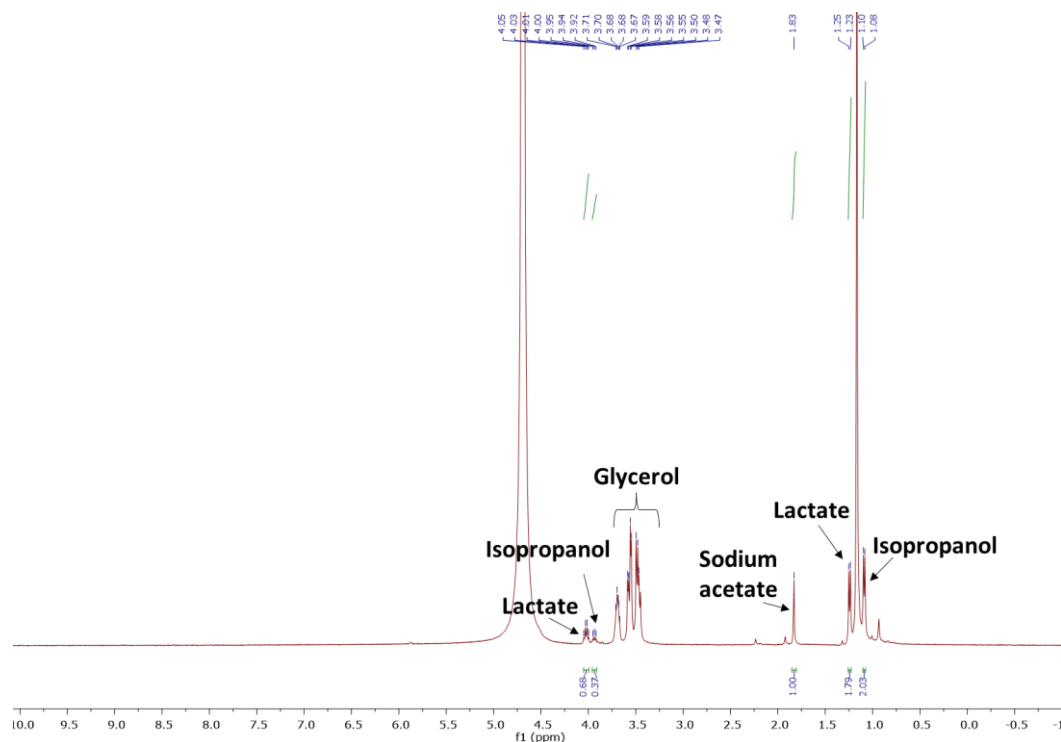

**Figure S30.** <sup>1</sup>H NMR spectrum of glycerol (7) dehydrogenation to lactate (9) using acetone (8) as acceptor, catalyzed by MnCl<sub>2</sub>·4H<sub>2</sub>O (0.5 mol%), KO<sup>t</sup>Bu (1 equiv.) at 140 °C in D<sub>2</sub>O. (Entry 3, Table 1)

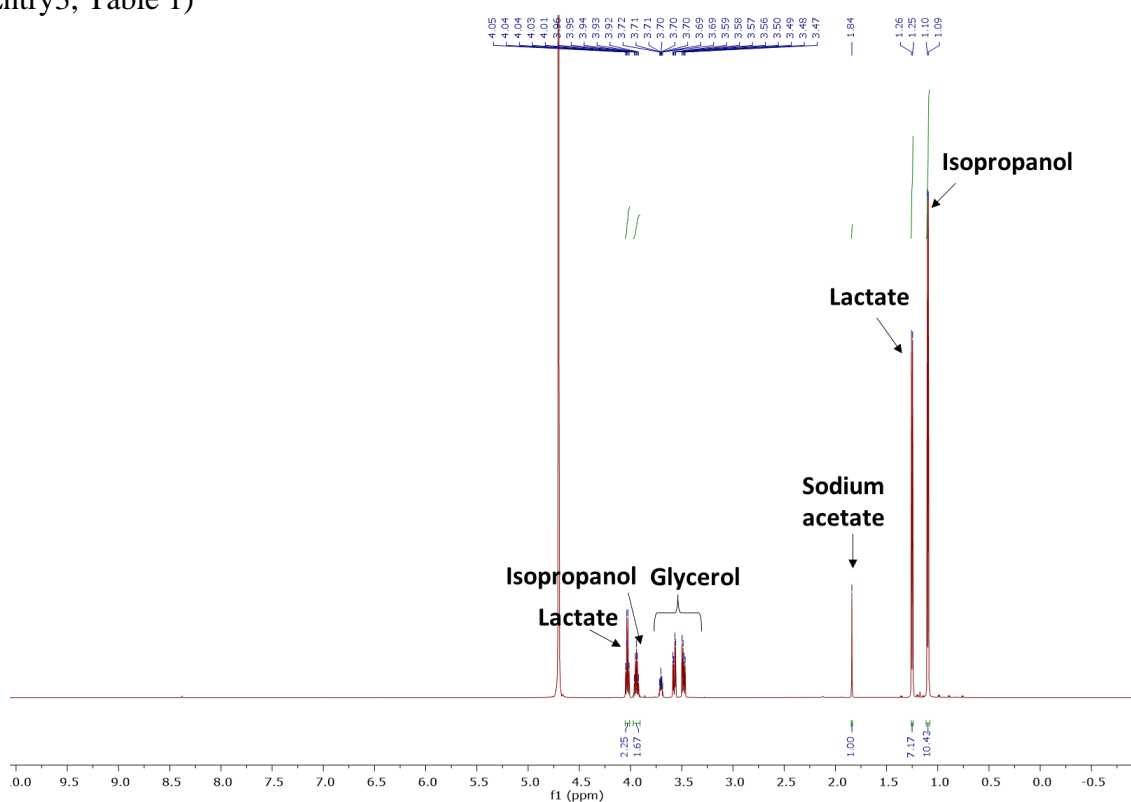

**Figure S31.** <sup>1</sup>H NMR spectrum of glycerol (7) dehydrogenation to lactate (9) using acetone (8) as acceptor, catalyzed by MnCl<sub>2</sub>·4H<sub>2</sub>O (0.5 mol%), NaOH (1 equiv.) at 140 °C in D<sub>2</sub>O. (Entry 4, Table 1)

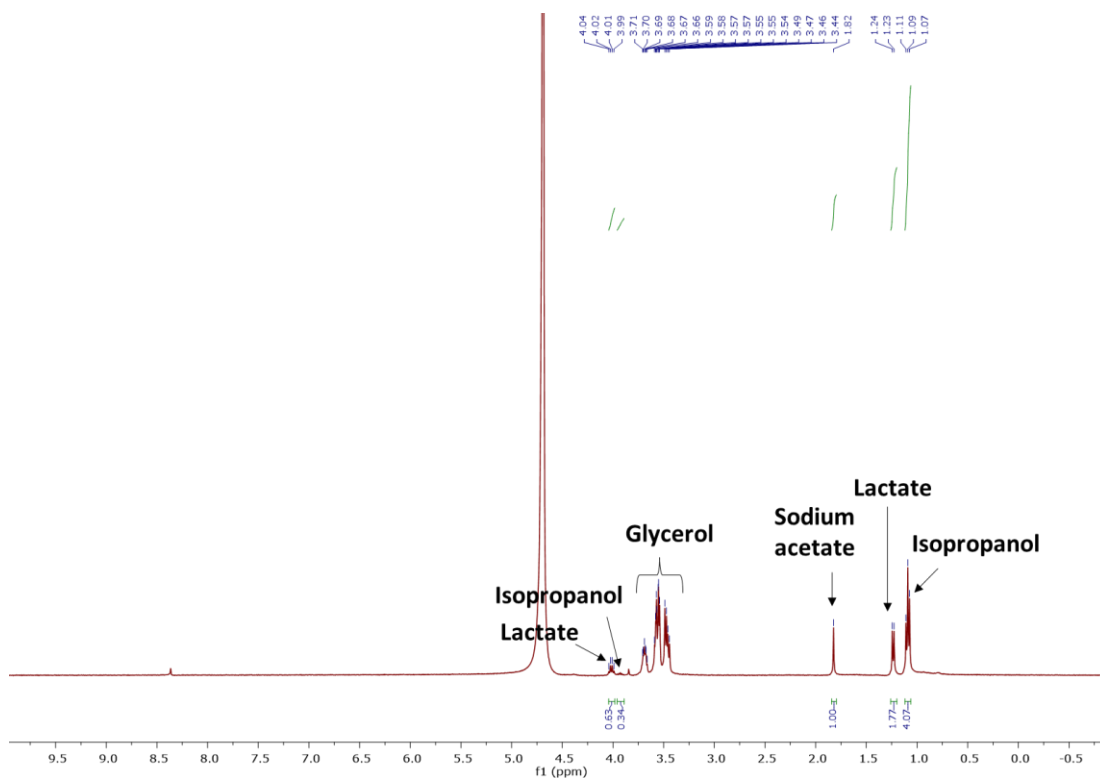

**Figure S32.** <sup>1</sup>H NMR spectrum of glycerol (7) dehydrogenation to lactate (9) using acetone (8) as acceptor, catalyzed by MnCl<sub>2</sub>·4H<sub>2</sub>O (0.5 mol%), NaOEt (1 equiv.) at 140 °C in D<sub>2</sub>O. (Entry 8, Table 1)

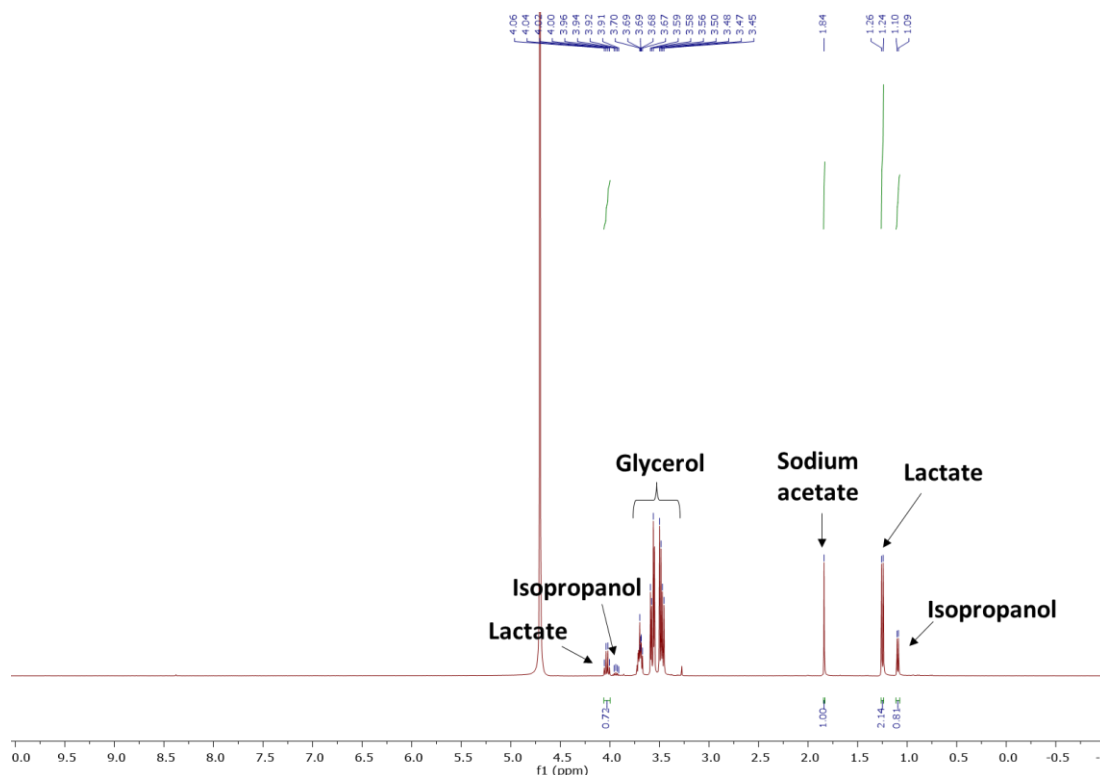

**Figure S33.** <sup>1</sup>H NMR spectrum of glycerol (7) dehydrogenation to lactate (9) using acetone (8) as acceptor, in metal free condition, NaOH (1 equiv.) at 140 °C in D<sub>2</sub>O. (Entry 9, Table 1)

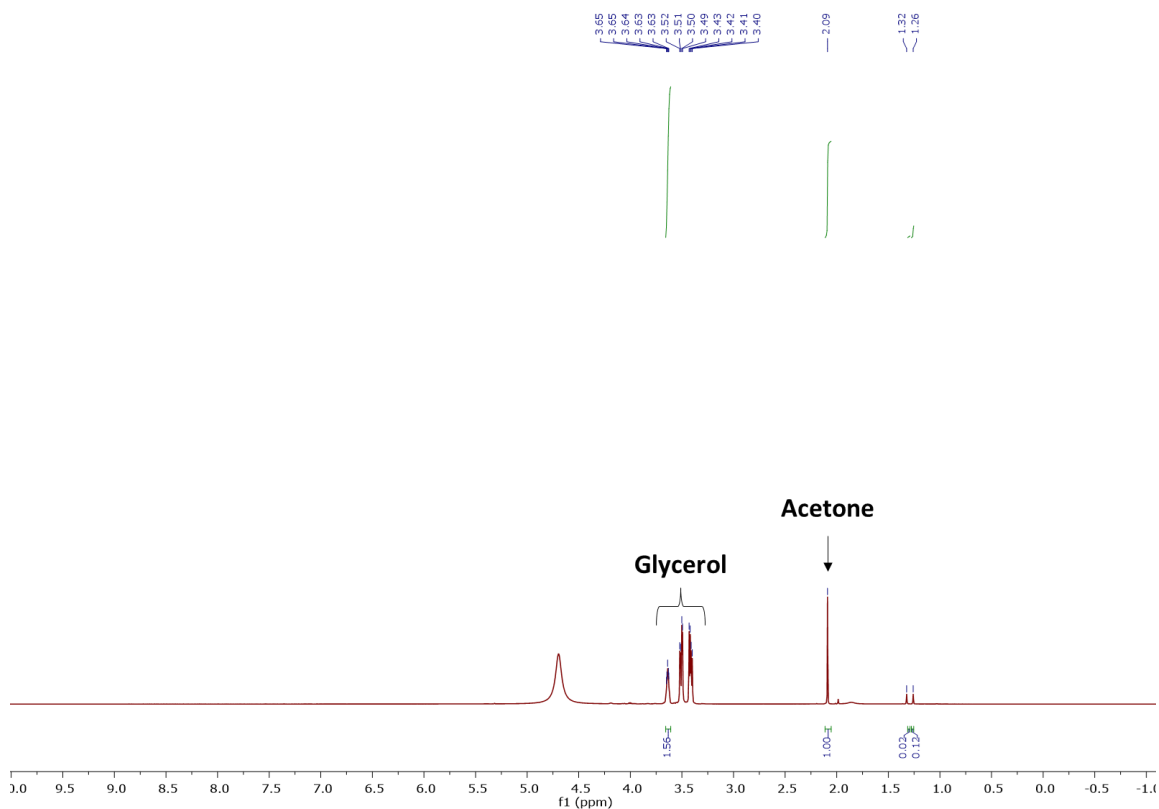

**Figure S34.** <sup>1</sup>H NMR spectrum of glycerol (7) dehydrogenation to lactate (9) using acetone (8) as acceptor, catalyzed by MnCl<sub>2</sub>·4H<sub>2</sub>O (0.5 mol%), in base free condition at 140 °C in D<sub>2</sub>O. (Entry 10, Table 1)

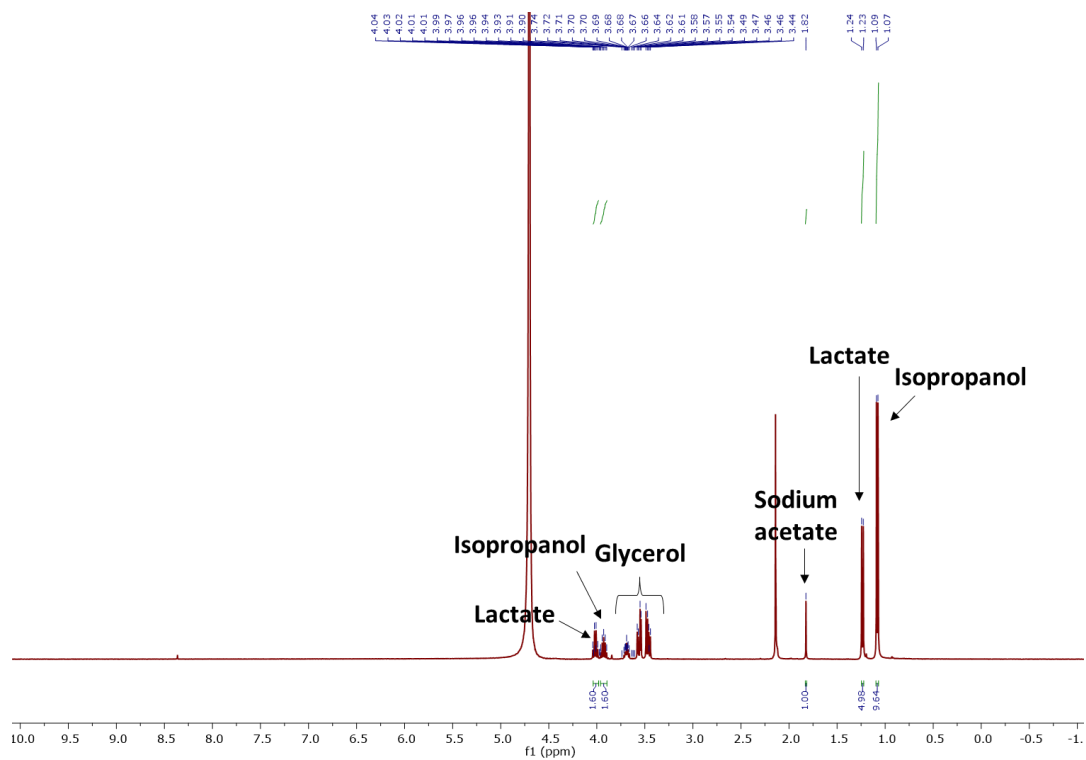

**Figure S35.** <sup>1</sup>H NMR spectrum of glycerol (7) dehydrogenation to lactate (9) using acetone (8) as acceptor, catalyzed by MnCl<sub>2</sub>·4H<sub>2</sub>O (0.5 mol%), NaOH (0.75 equiv.) at 140 °C in D<sub>2</sub>O. (Entry 11, Table 1)

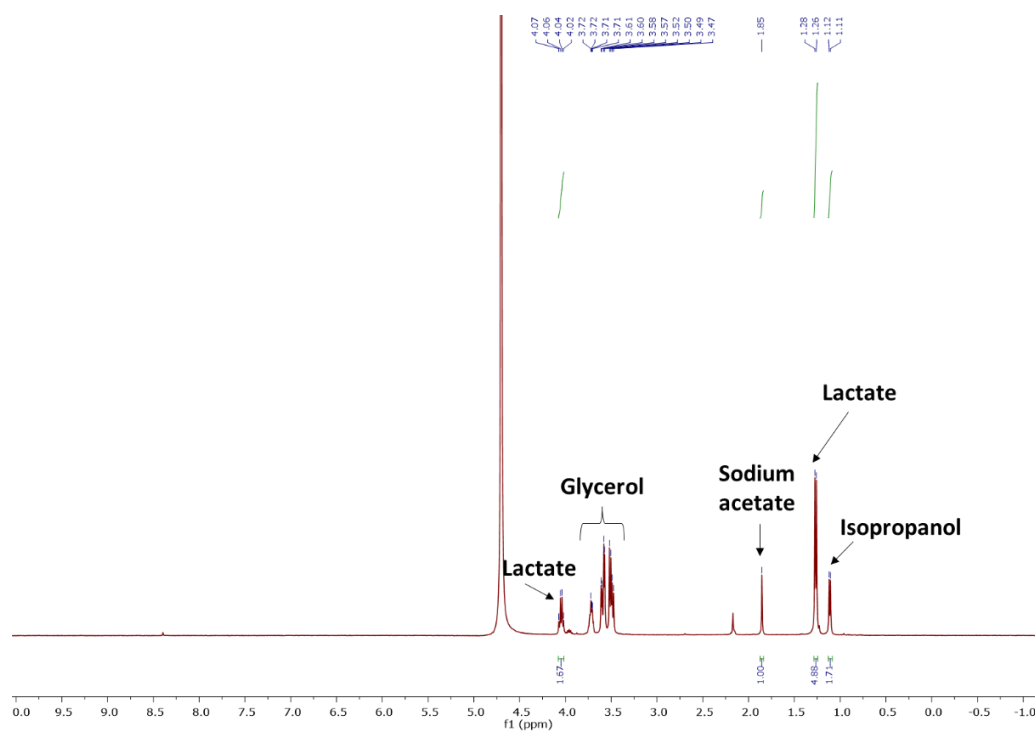

**Figure S36.** <sup>1</sup>H NMR spectrum of glycerol (7) dehydrogenation to lactate (9) using acetone (8) as acceptor, catalyzed by MnCl<sub>2</sub>·4H<sub>2</sub>O (0.5 mol%), NaOH (0.5 equiv.) at 140 °C in D<sub>2</sub>O. (Entry 12, Table 1)

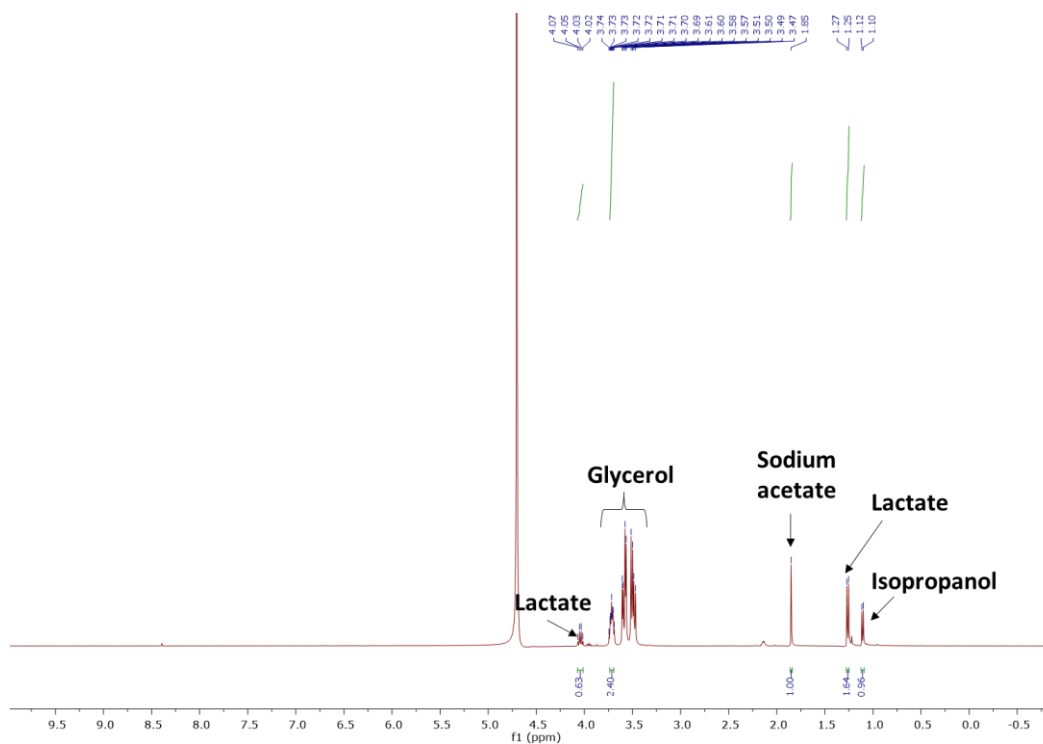

**Figure S37.** <sup>1</sup>H NMR spectrum of glycerol (7) dehydrogenation to lactate (9) using acetone (8) as acceptor, catalyzed by MnCl<sub>2</sub>·4H<sub>2</sub>O (0.5 mol%), NaOH (0.25 equiv.) at 140 °C in D<sub>2</sub>O. (Entry 13, Table 1)

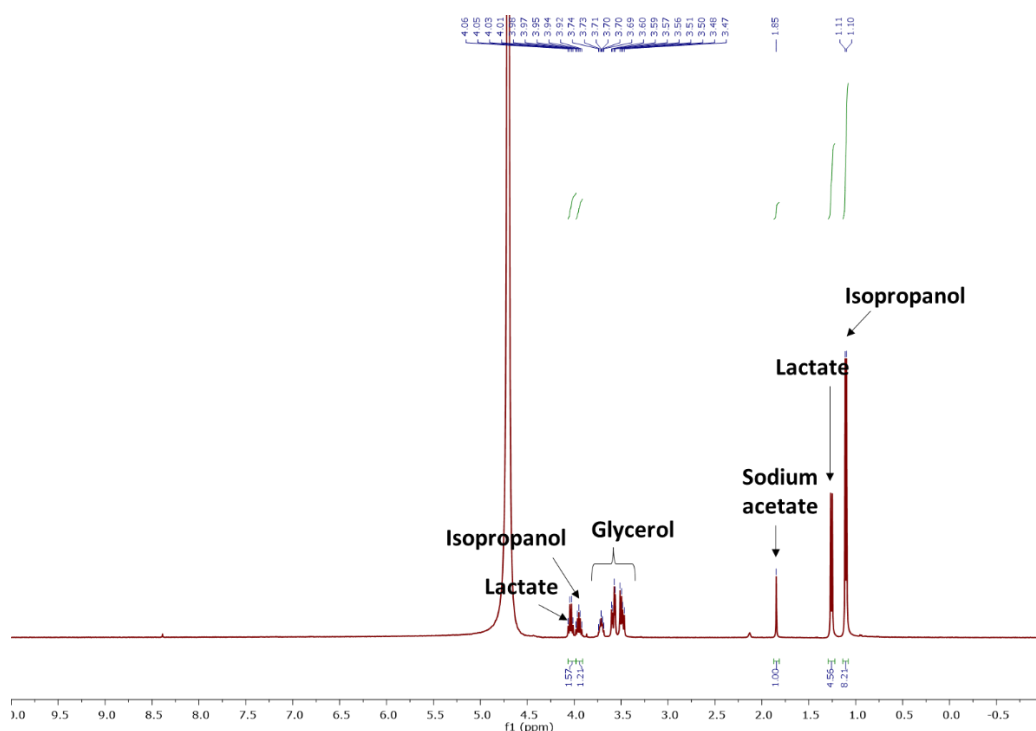

**Figure S38.** <sup>1</sup>H NMR spectrum of glycerol (**7**) dehydrogenation to lactate (**9**) using acetone (**8**) as acceptor, catalyzed by MnCl<sub>2</sub>·4H<sub>2</sub>O (0.25 mol%), NaOH (1 equiv.) at 140 °C in D<sub>2</sub>O. (Entry 14, Table 1)

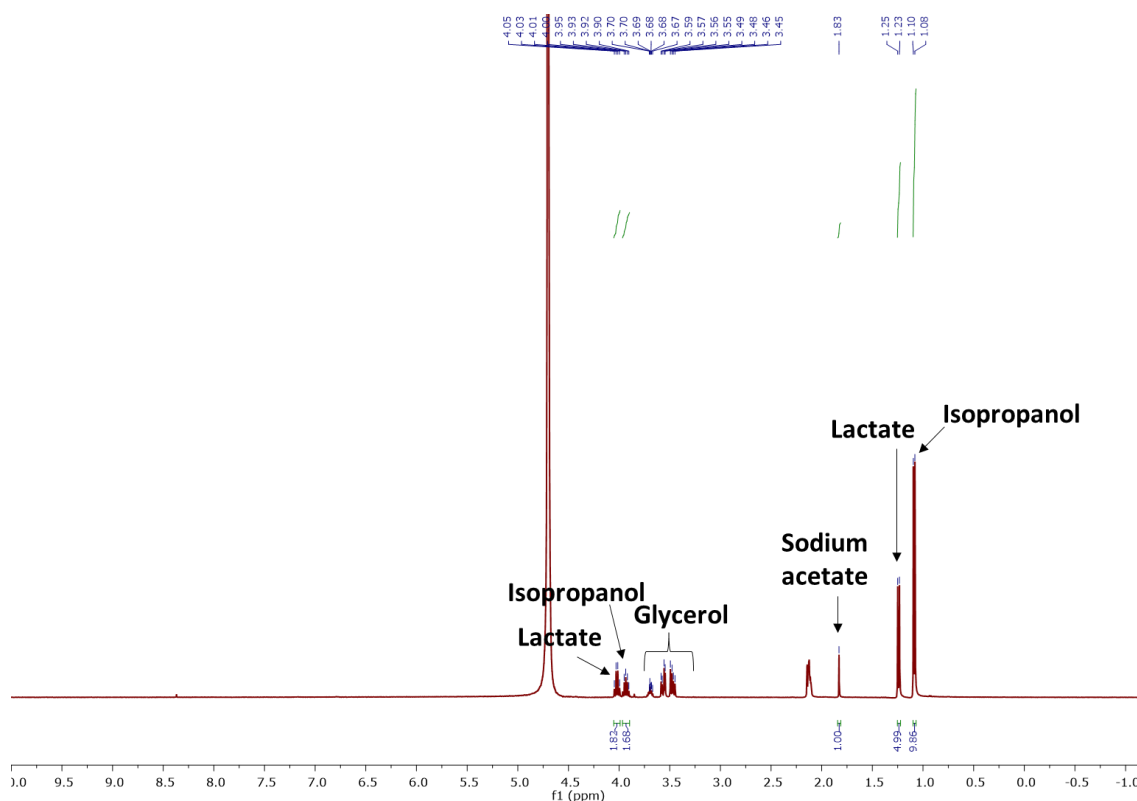

**Figure S39.** <sup>1</sup>H NMR spectrum of glycerol (**7**) dehydrogenation to lactate (**9**) using acetone (**8**) as acceptor, catalyzed by MnCl<sub>2</sub>·4H<sub>2</sub>O (0.125 mol%), NaOH (1 equiv.) at 140 °C in D<sub>2</sub>O. (Entry 15, Table 1)



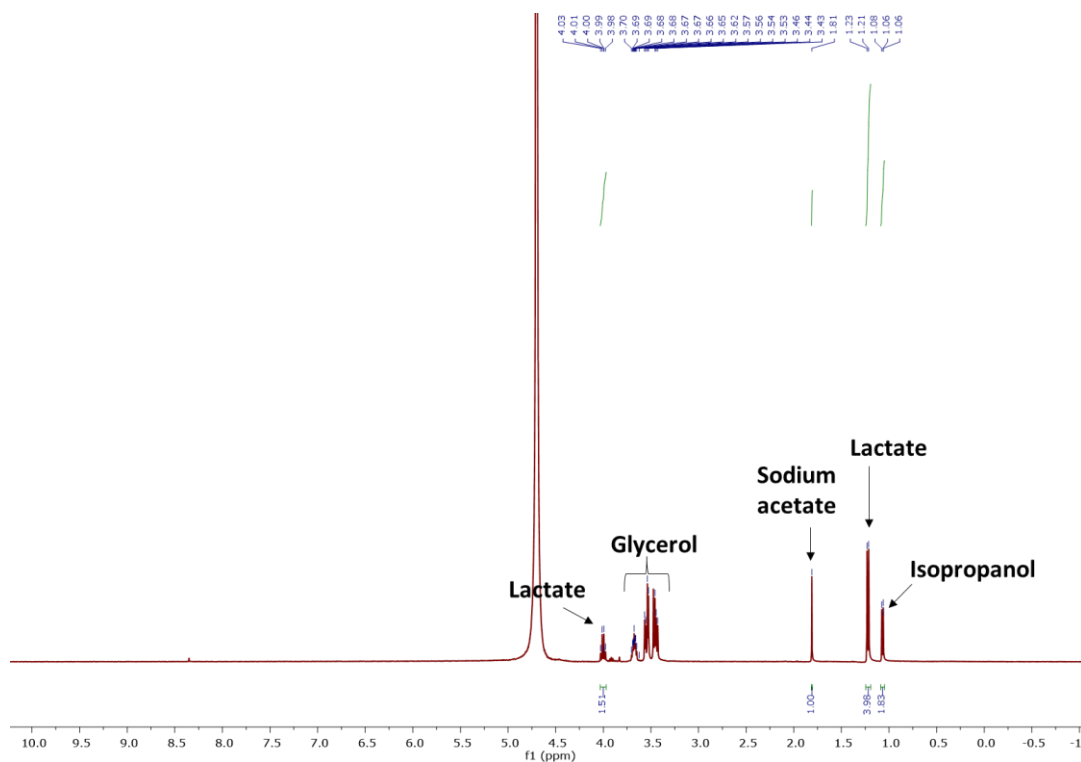

**Figure S40.** <sup>1</sup>H NMR spectrum of glycerol (7) dehydrogenation to lactate (9) using acetone (8) as acceptor, catalyzed by MnCl<sub>2</sub>·4H<sub>2</sub>O (0.0625 mol%), NaOH (1 equiv.) at 140 °C in D<sub>2</sub>O. (Entry 16, Table 1)

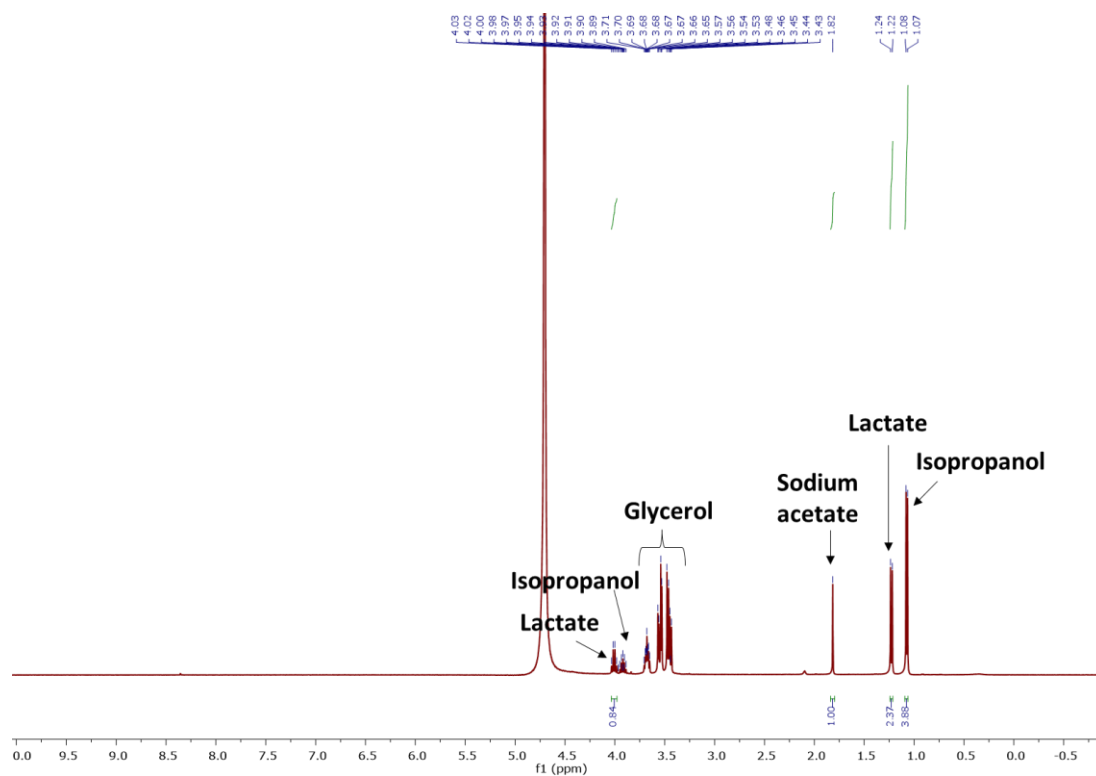

**Figure S41.** <sup>1</sup>H NMR spectrum of glycerol (7) dehydrogenation to lactate (9) using acetone (8) as acceptor, catalyzed by MnCl<sub>2</sub>·4H<sub>2</sub>O (0.5 mol%), NaOH (1 equiv.) at 120 °C in D<sub>2</sub>O. (Entry 17, Table 1)

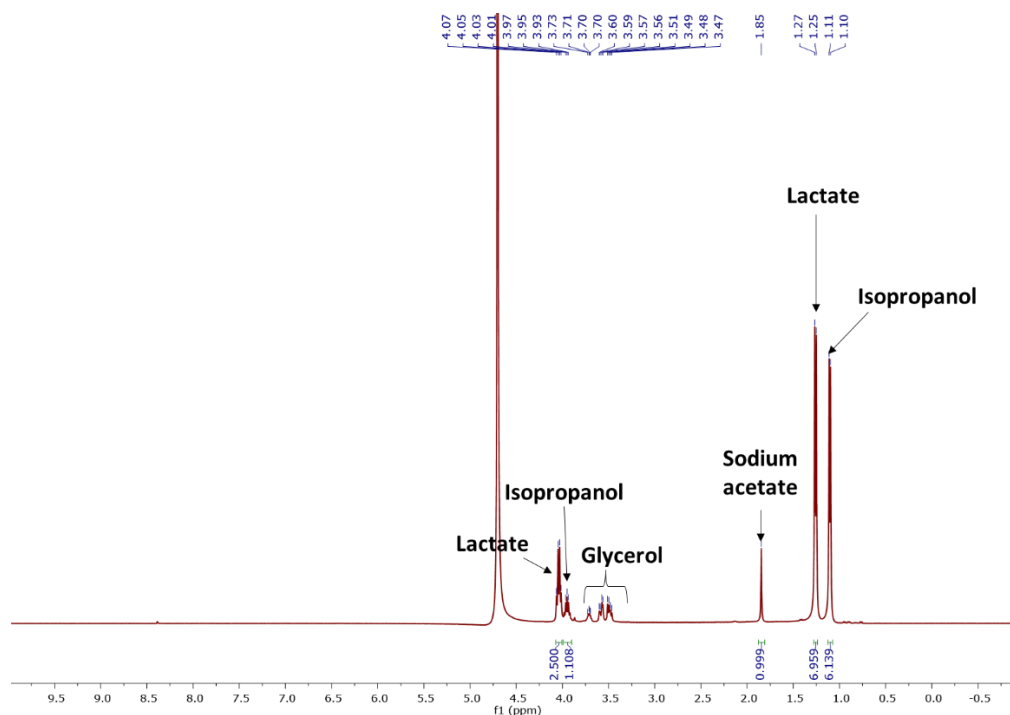

**Figure S42.** <sup>1</sup>H NMR spectrum of glycerol (7) dehydrogenation to lactate (9) using acetone (8) as acceptor, catalyzed by MnCl<sub>2</sub>·4H<sub>2</sub>O (0.5 mol%), NaOH (1 equiv.) at 160 °C in D<sub>2</sub>O. (Entry 18, Table 1)

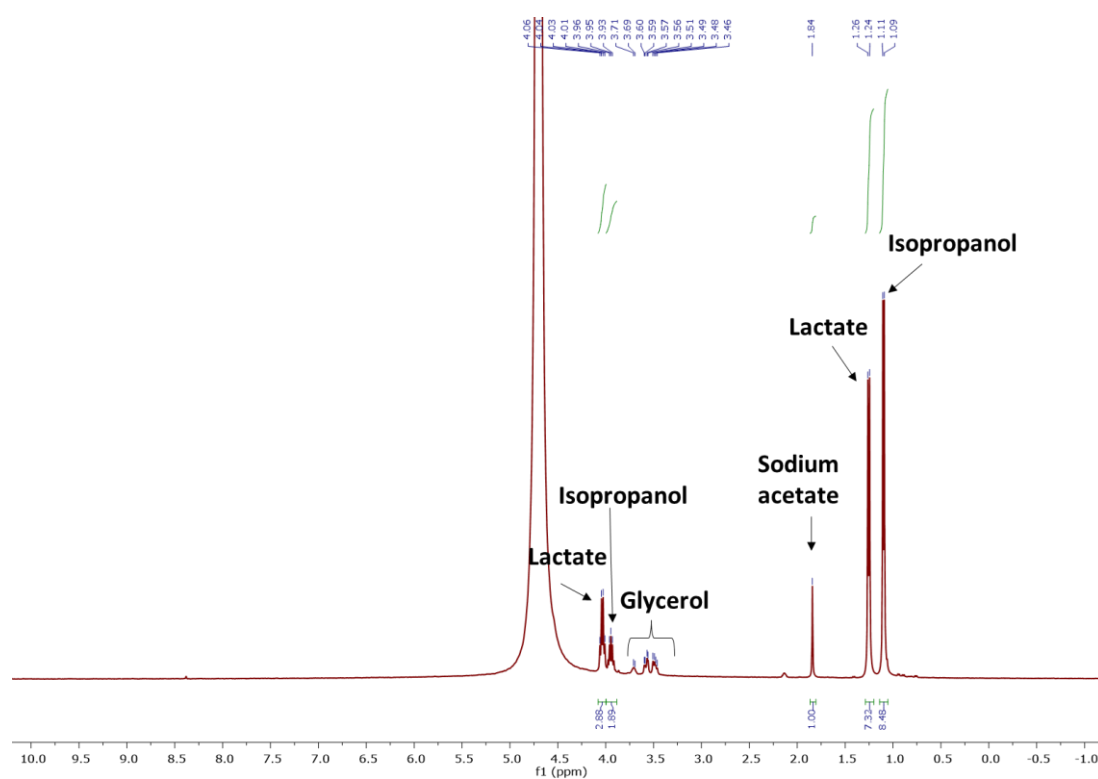

**Figure S43.** <sup>1</sup>H NMR spectrum of glycerol (7) dehydrogenation to lactate (9) using acetone (8) as acceptor, catalyzed by 6a (0.5 mol%), NaOH (1 equiv.) at 140 °C in D<sub>2</sub>O. (Entry 20, Table 1)

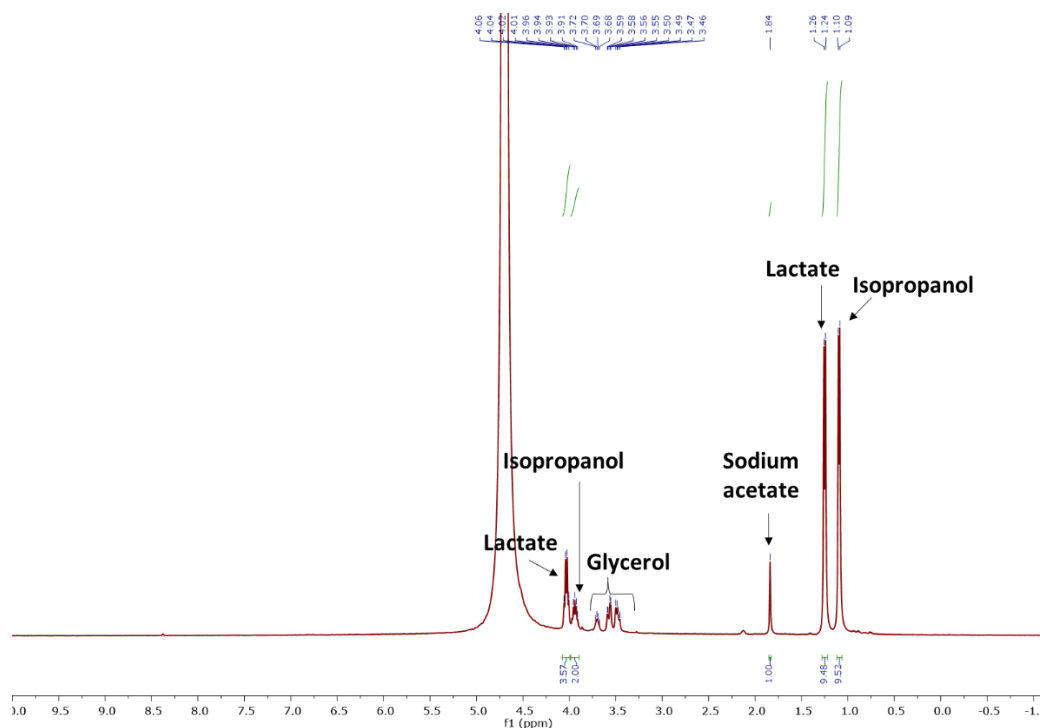

**Figure S44.**  $^1\text{H}$  NMR spectrum of glycerol (**7**) dehydrogenation to lactate (**9**) using acetone (**8**) as acceptor, catalyzed by **6b** (0.5 mol%), NaOH (1 equiv.) at 140 °C in  $\text{D}_2\text{O}$ . (Entry 21, Table 1)

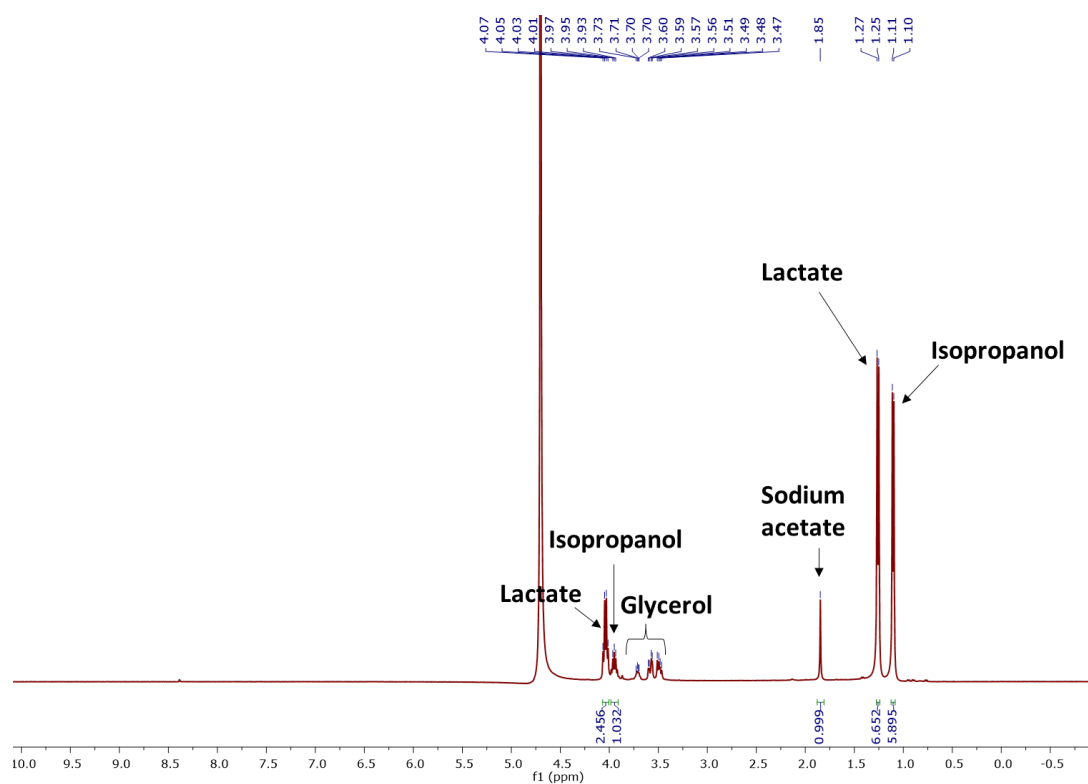

**Figure S45.**  $^1\text{H}$  NMR spectrum of glycerol (**7**) dehydrogenation to lactate (**9**) using acetone (**8**) as acceptor, catalyzed by **6c** (0.5 mol%), NaOH (1 equiv.) at 140 °C in  $\text{D}_2\text{O}$ . (Entry 22, Table 1)

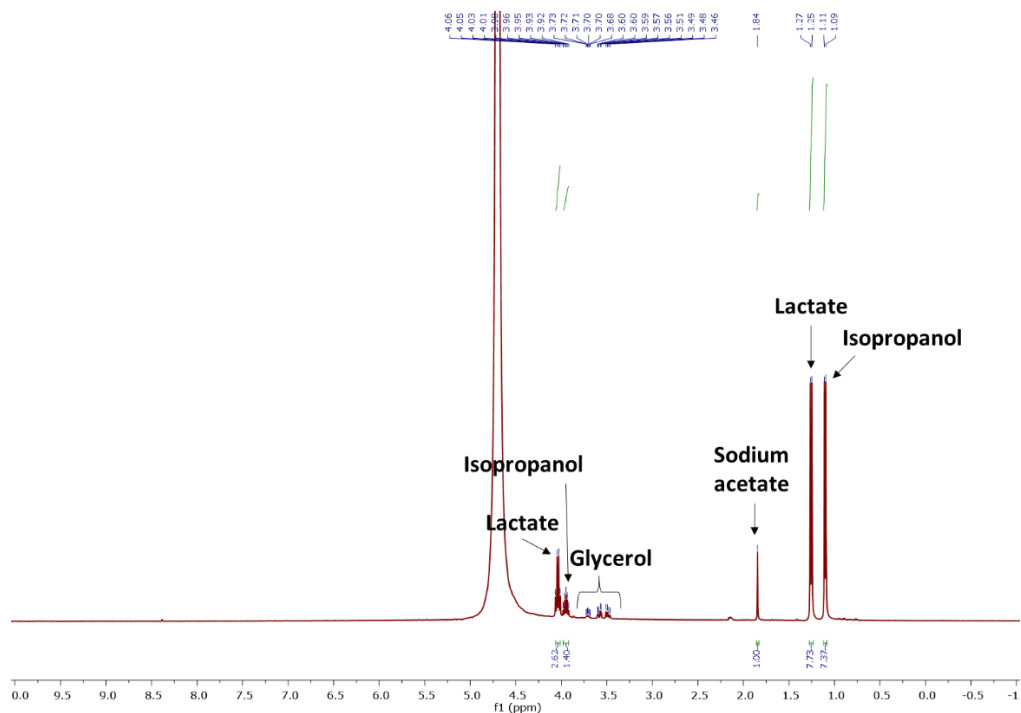

**Figure S46.**  $^1\text{H}$  NMR spectrum of glycerol (**7**) dehydrogenation to lactate (**9**) using acetone (**8**) as acceptor, catalyzed by **6d** (0.5 mol%), NaOH (1 equiv.) at 140 °C in  $\text{D}_2\text{O}$ . (Entry 23, Table 1)

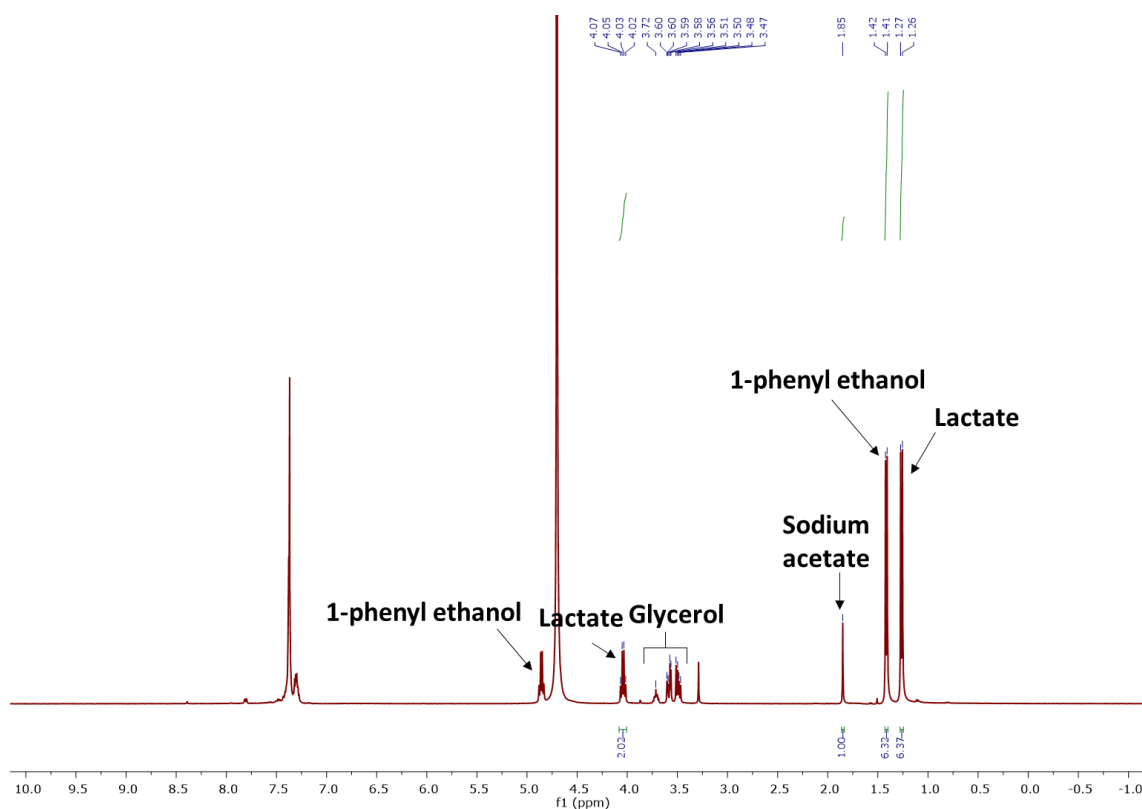

**Figure S47.**  $^1\text{H}$  NMR spectrum of glycerol (**7**) dehydrogenation to lactate (**9**) using acetophenone (**8a**) as acceptor, catalyzed by  $\text{MnCl}_2 \cdot 4\text{H}_2\text{O}$  (0.5 mol%), NaOH (1 equiv.) at 140 °C in  $\text{D}_2\text{O}$ . (Entry 1, Table 2)

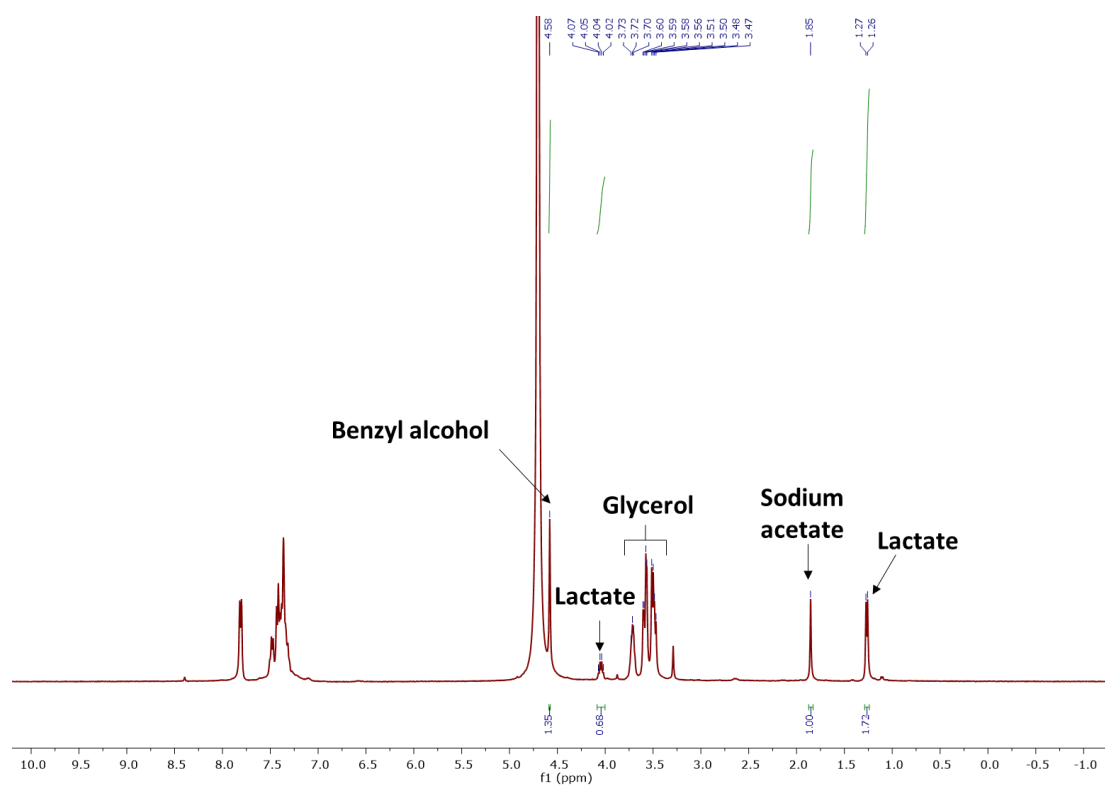

**Figure S48.** <sup>1</sup>H NMR spectrum of glycerol (7) dehydrogenation to lactate (9) using benzaldehyde (8b) as acceptor, catalyzed by MnCl<sub>2</sub>·4H<sub>2</sub>O (0.5 mol%), NaOH (1 equiv.) at 140 °C in D<sub>2</sub>O. (Entry 2, Table 2)

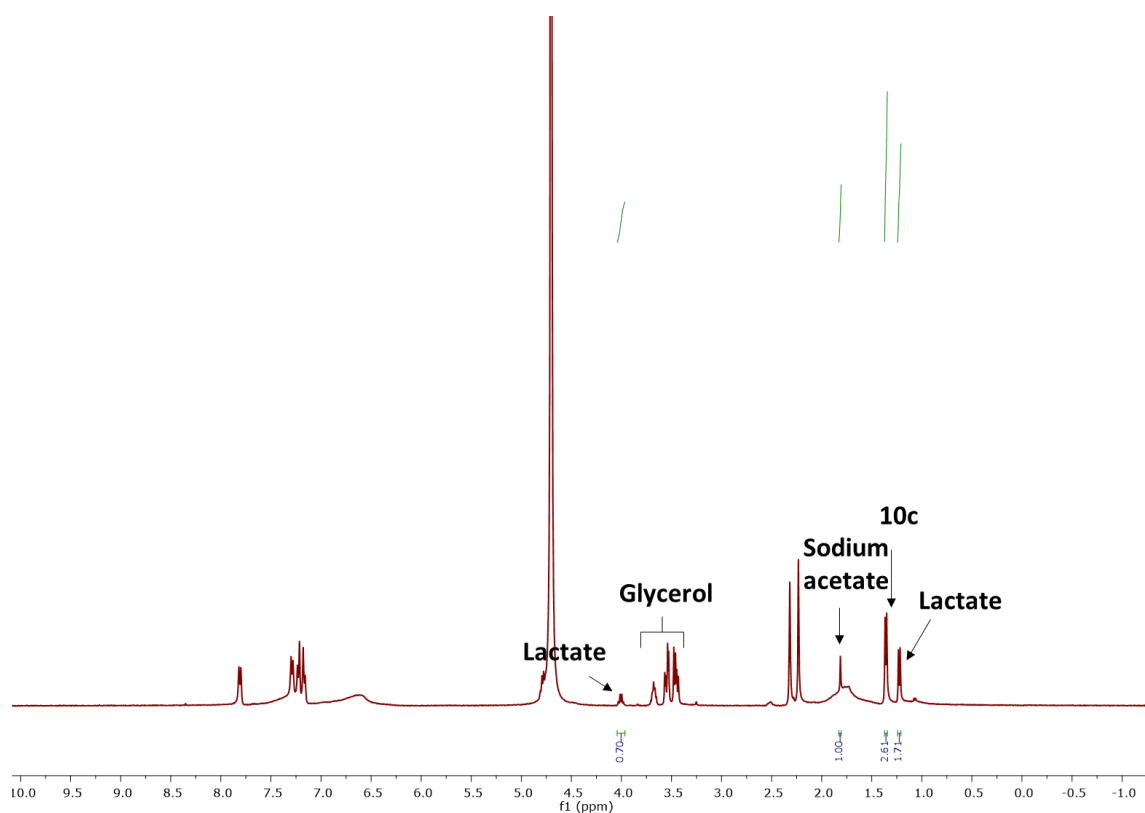

**Figure S49.** <sup>1</sup>H NMR spectrum of glycerol (7) dehydrogenation to lactate (9) using 4-methyl acetophenone (8c) as acceptor, catalyzed by MnCl<sub>2</sub>·4H<sub>2</sub>O (0.5 mol%), NaOH (1 equiv.) at 140 °C in D<sub>2</sub>O. (Entry 3, Table 2)

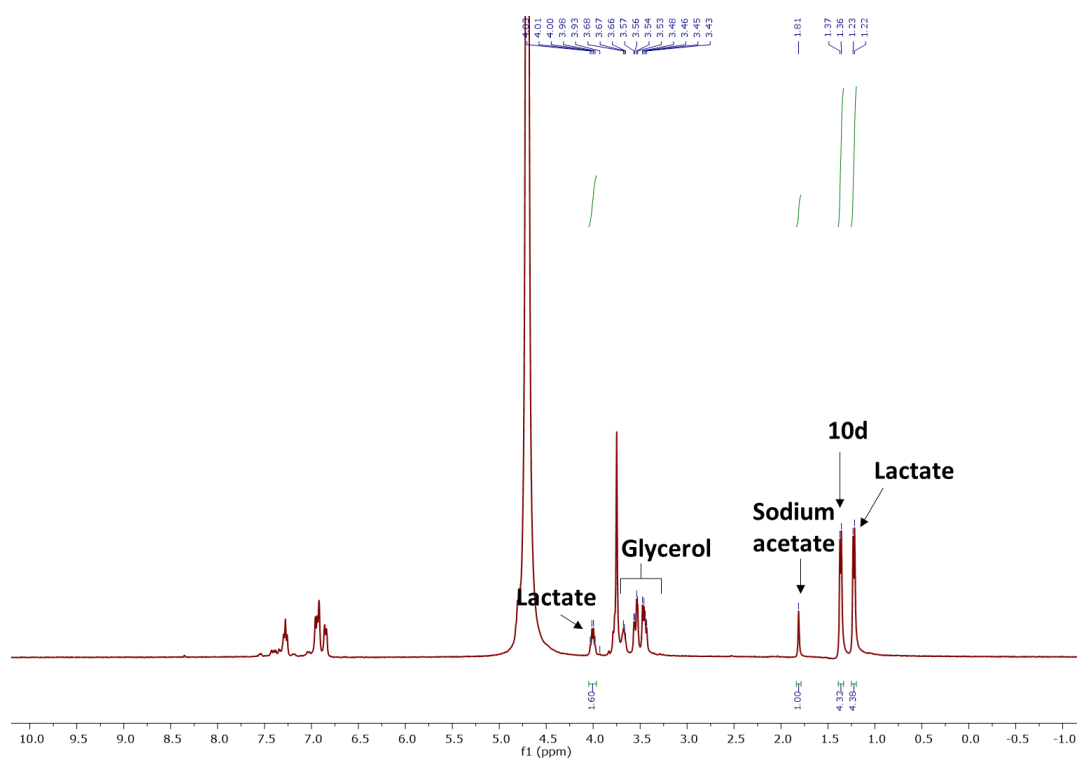

**Figure S50.** <sup>1</sup>H NMR spectrum of glycerol (**7**) dehydrogenation to lactate (**9**) using 3-methoxy acetophenone (**8d**) as acceptor, catalyzed by MnCl<sub>2</sub>·4H<sub>2</sub>O (0.5 mol%), NaOH (1 equiv.) at 140 °C in D<sub>2</sub>O. (Entry 4, Table 2)

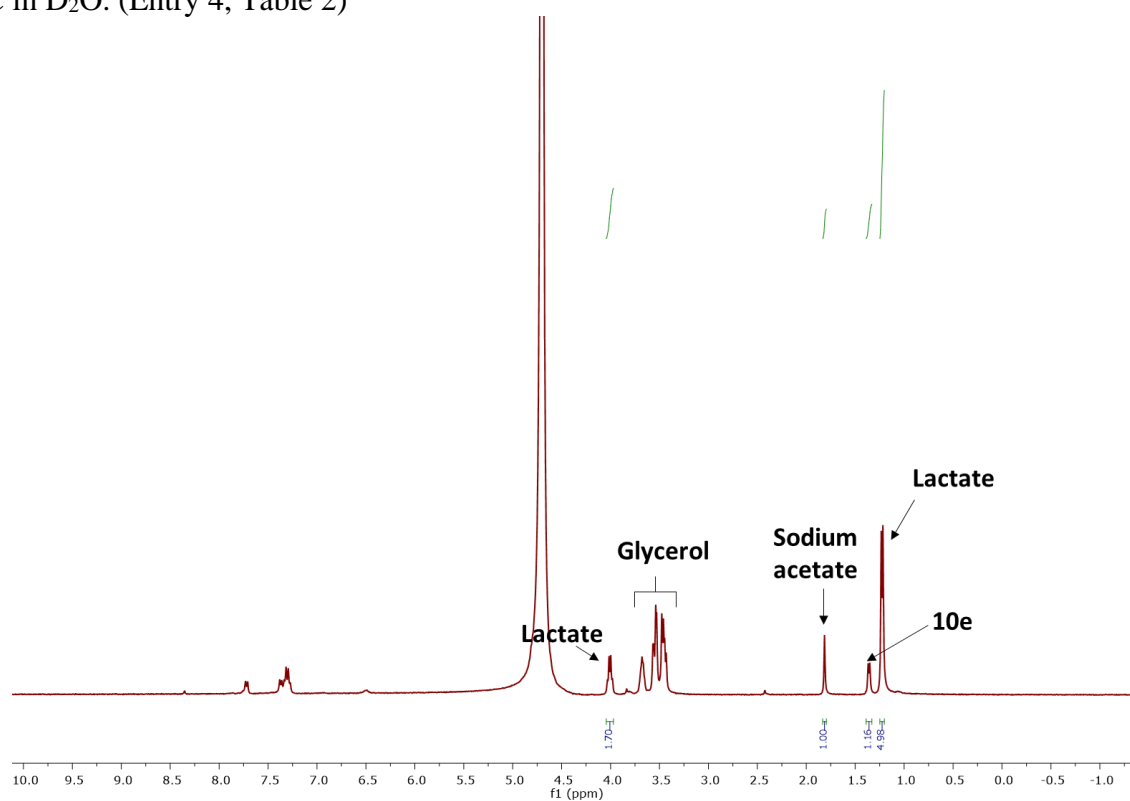

**Figure S51.** <sup>1</sup>H NMR spectrum of glycerol (**7**) dehydrogenation to lactate (**9**) using 4-chloro acetophenone (**8e**) as acceptor, catalyzed by MnCl<sub>2</sub>·4H<sub>2</sub>O (0.5 mol%), NaOH (1 equiv.) at 140 °C in D<sub>2</sub>O. (Entry 5, Table 2)

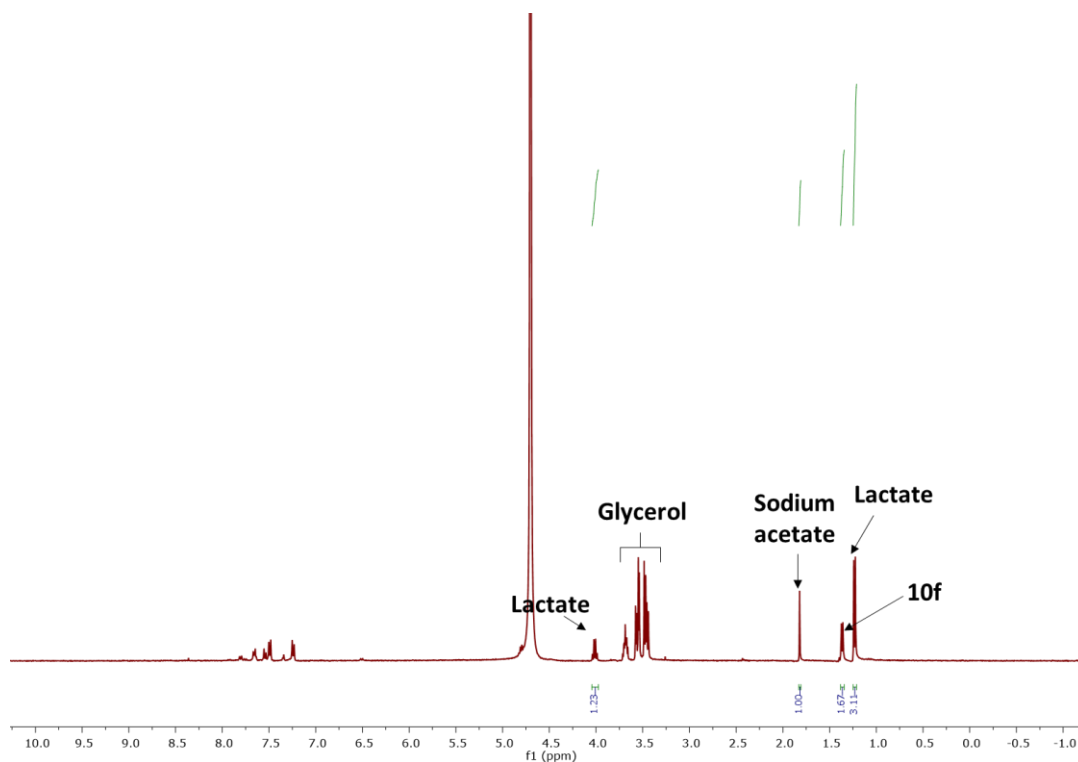

**Figure S52.** <sup>1</sup>H NMR spectrum of glycerol (**7**) dehydrogenation to lactate (**9**) using 4-bromoacetophenone (**8f**) as acceptor, catalyzed by MnCl<sub>2</sub>·4H<sub>2</sub>O (0.5 mol%), NaOH (1 equiv.) at 140 °C in D<sub>2</sub>O. (Entry 6, Table 2)

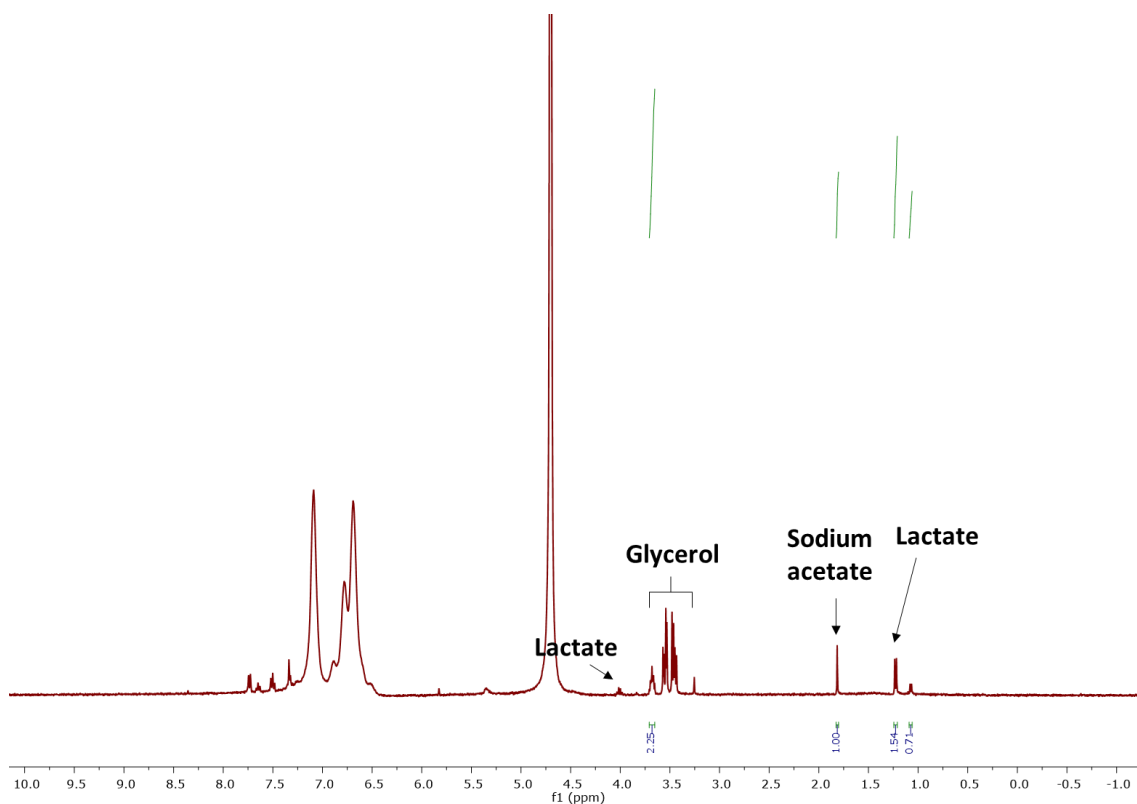

**Figure S53.** <sup>1</sup>H NMR spectrum of glycerol (**7**) dehydrogenation to lactate (**9**) using benzophenone (**8h**) as acceptor, catalyzed by MnCl<sub>2</sub>·4H<sub>2</sub>O (0.5 mol%), NaOH (1 equiv.) at 140 °C in D<sub>2</sub>O. (Entry 8, Table 2)

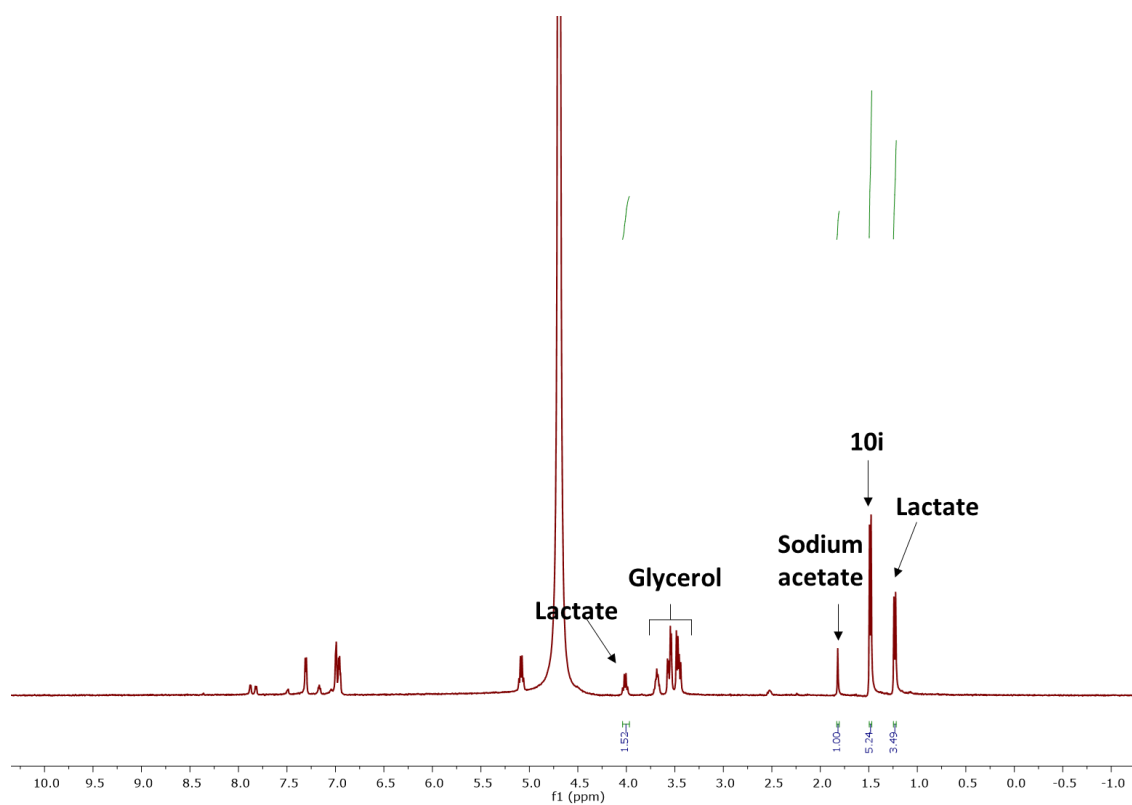

**Figure S54.** <sup>1</sup>H NMR spectrum of glycerol (**7**) dehydrogenation to lactate (**9**) using 2-acetyl thiophene (**8i**) as acceptor, catalyzed by MnCl<sub>2</sub>·4H<sub>2</sub>O (0.5 mol%), NaOH (1 equiv.) at 140 °C in D<sub>2</sub>O. (Entry 9, Table 2)

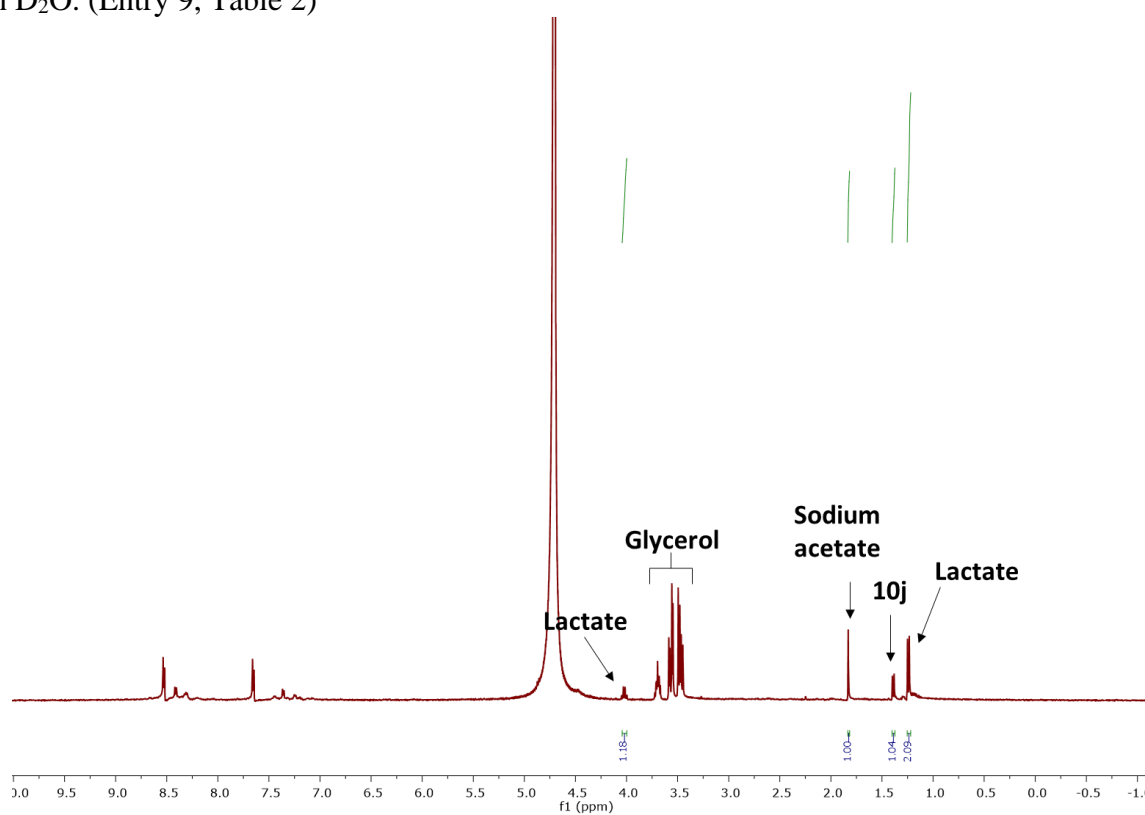

**Figure S55.** <sup>1</sup>H NMR spectrum of glycerol (**7**) dehydrogenation to lactate (**9**) using 4-acetyl pyridine (**8j**) as acceptor, catalyzed by MnCl<sub>2</sub>·4H<sub>2</sub>O (0.5 mol%), NaOH (1 equiv.) at 140 °C in D<sub>2</sub>O. (Entry 10, Table 2)



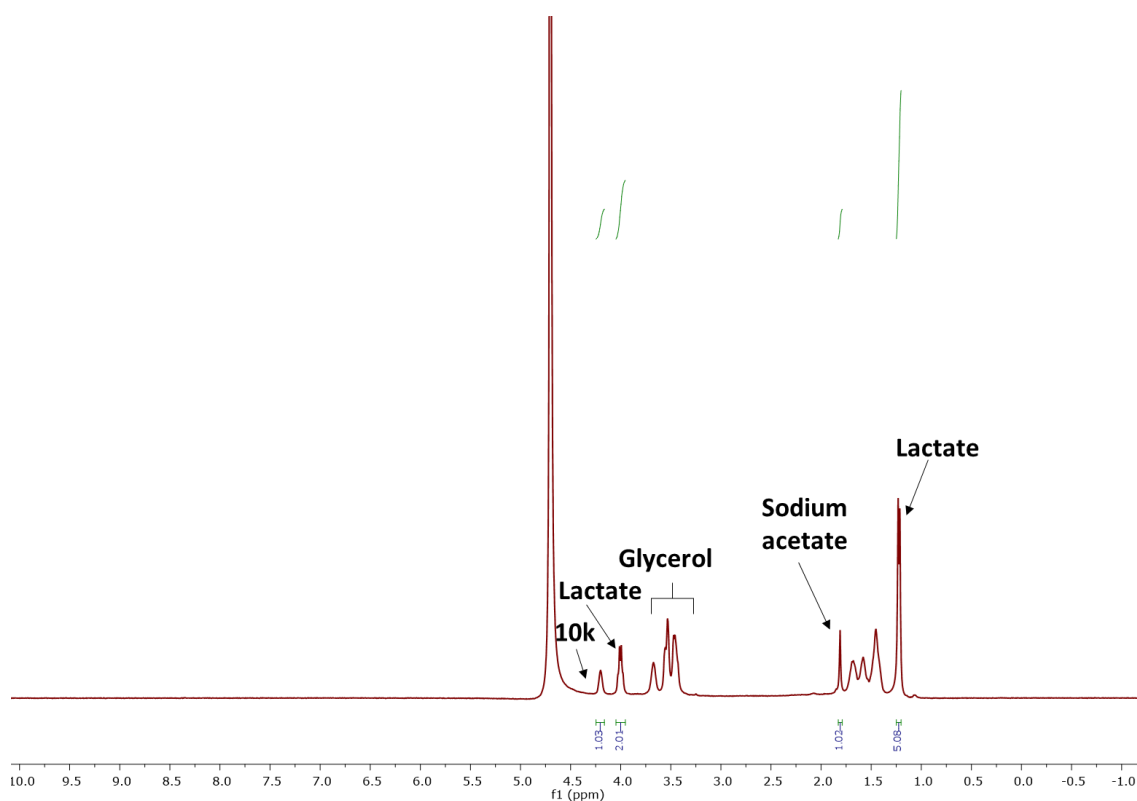

**Figure S56.** <sup>1</sup>H NMR spectrum of glycerol (**7**) dehydrogenation to lactate (**9**) using cyclopentanone (**8k**) as acceptor, catalyzed by MnCl<sub>2</sub>·4H<sub>2</sub>O (0.5 mol%), NaOH (1 equiv.) at 140 °C in D<sub>2</sub>O. (Entry 11, Table 2)

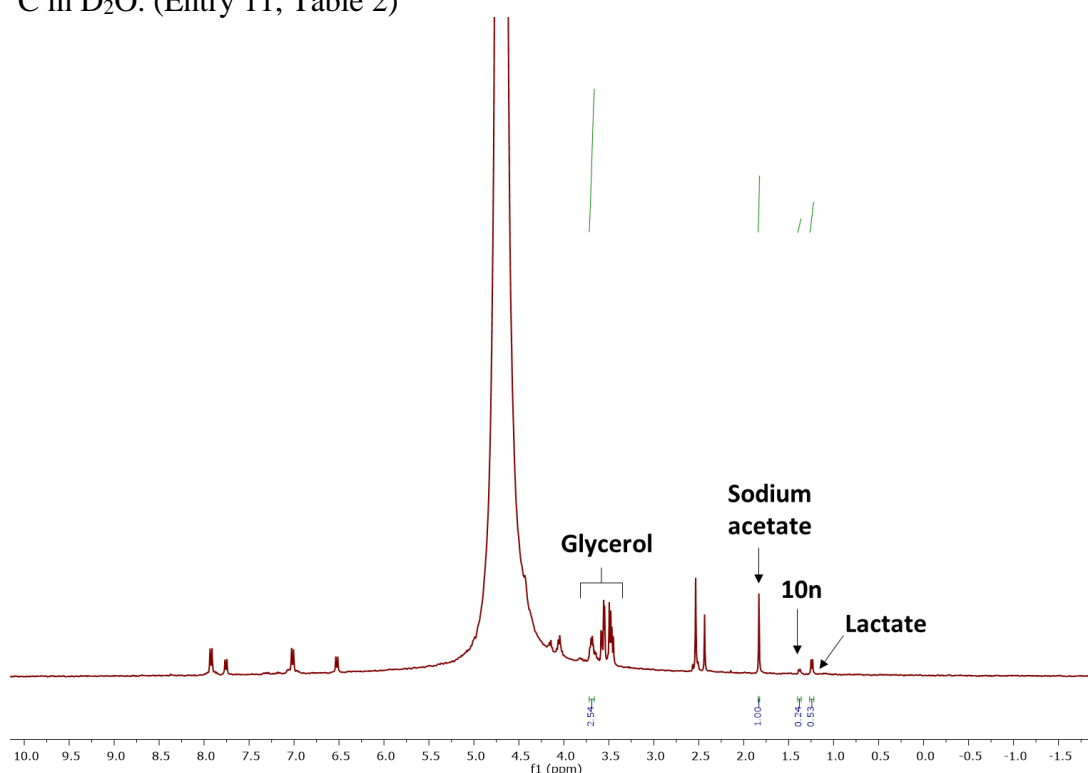

**Figure S57.** <sup>1</sup>H NMR spectrum of glycerol (**7**) dehydrogenation to lactate (**9**) using 4-Fluoro acetophenone (**8n**) as acceptor, catalyzed by MnCl<sub>2</sub>·4H<sub>2</sub>O (0.5 mol%), NaOH (1 equiv.) at 140 °C in D<sub>2</sub>O. (Entry 14, Table 2)

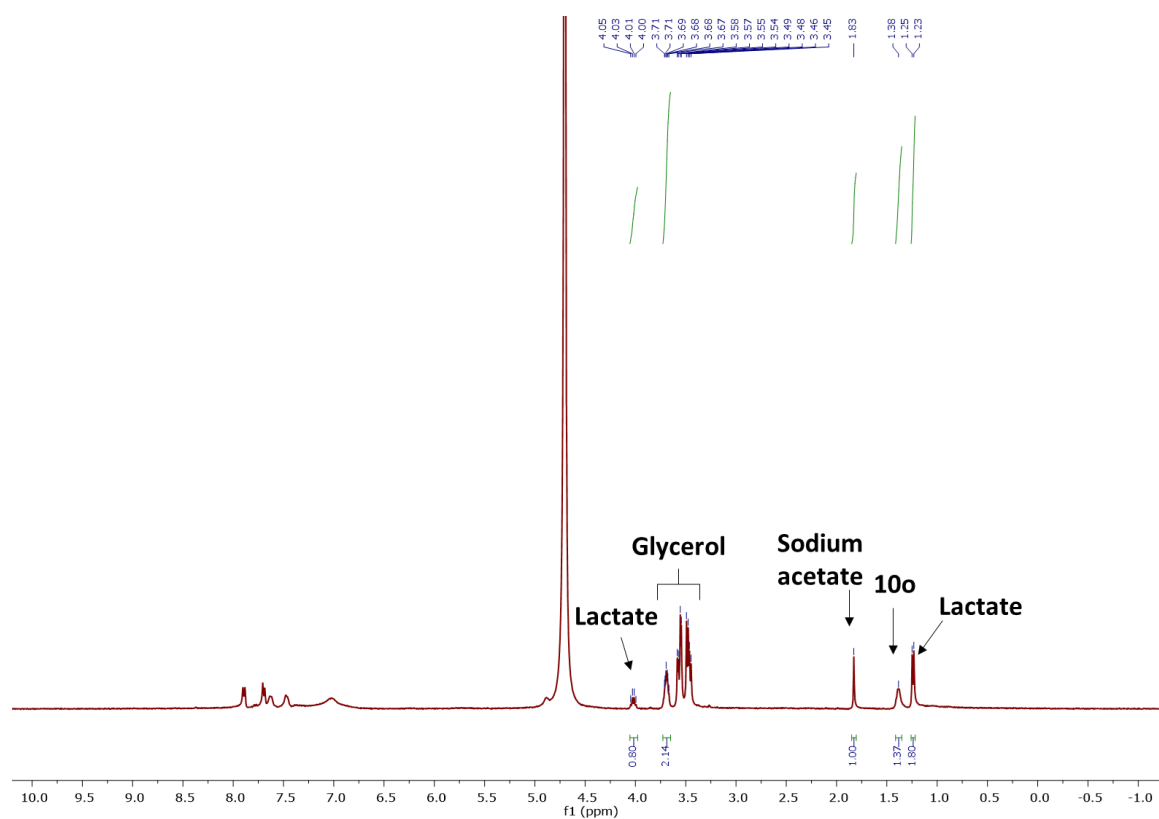

**Figure S58.** <sup>1</sup>H NMR spectrum of glycerol (**7**) dehydrogenation to lactate (**9**) using 4-trifluoromethyl acetophenone (**8o**) as acceptor, catalyzed by MnCl<sub>2</sub>·4H<sub>2</sub>O (0.5 mol%), NaOH (1 equiv.) at 140 °C in D<sub>2</sub>O. (Entry 15, Table 2)

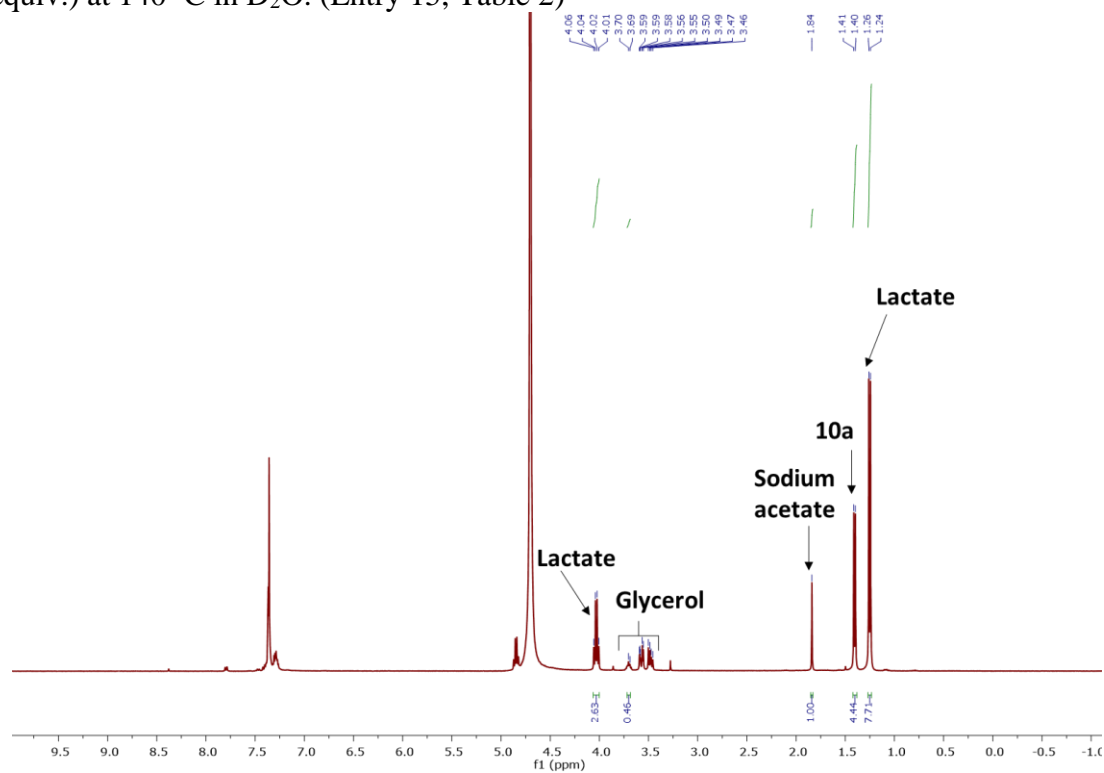

**Figure S59.** <sup>1</sup>H NMR spectrum of glycerol (**7**) dehydrogenation to lactate (**9**) using acetophenone (**8a**) as acceptor, catalyzed by **6d** (0.5 mol%), NaOH (1 equiv.) at 140 °C in D<sub>2</sub>O. (Entry 1, Table 2)

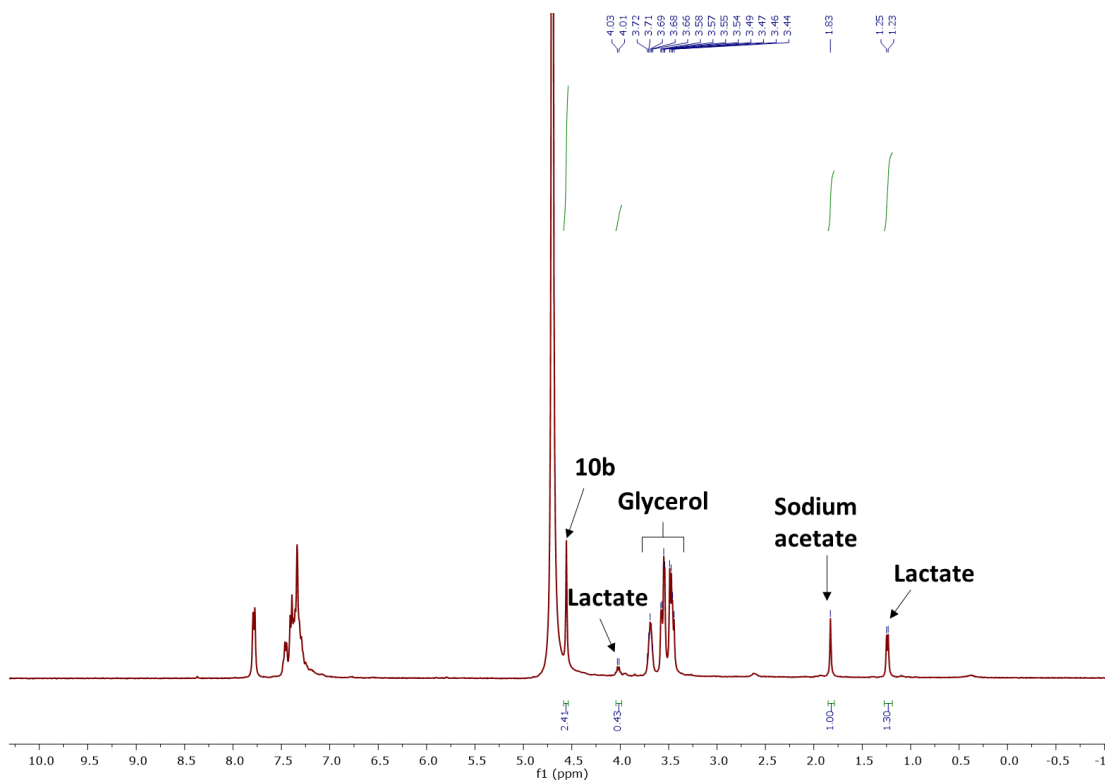

**Figure S60.** <sup>1</sup>H NMR spectrum of glycerol (**7**) dehydrogenation to lactate (**9**) using benzaldehyde (**8b**) as acceptor, catalyzed by **6d** (0.5 mol%), NaOH (1 equiv.) at 140 °C in D<sub>2</sub>O. (Entry 2, Table 2)

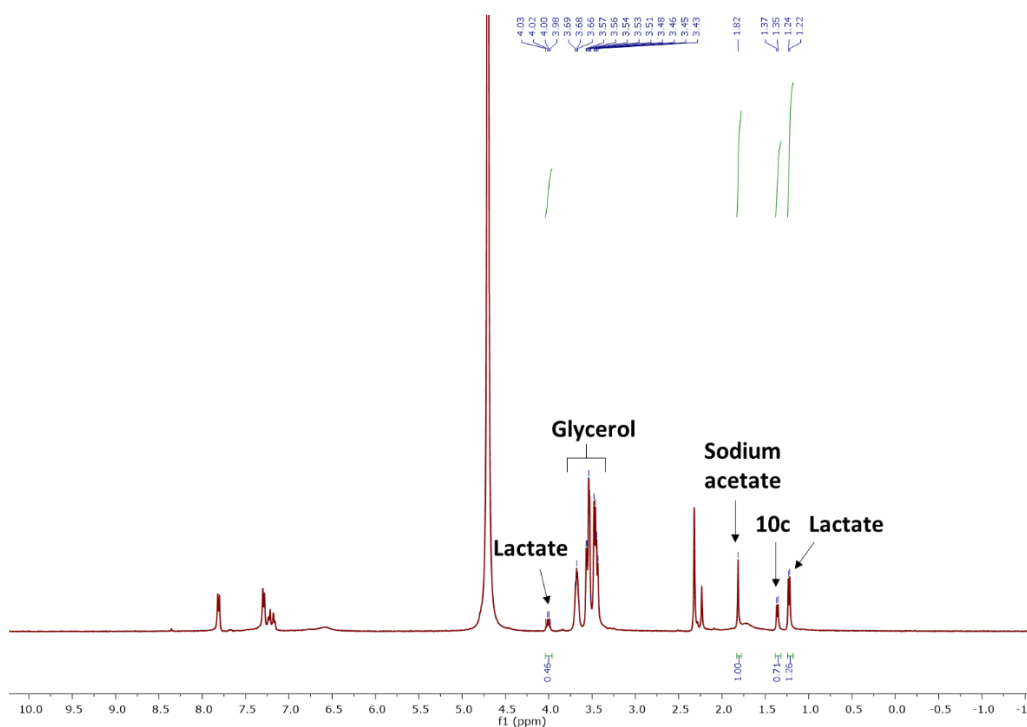

**Figure S61.** <sup>1</sup>H NMR spectrum of glycerol (**7**) dehydrogenation to lactate (**9**) using 4-methyl acetophenone (**8c**) as acceptor, catalyzed by **6d** (0.5 mol%), NaOH (1 equiv.) at 140 °C in D<sub>2</sub>O. (Entry 3, Table 2)

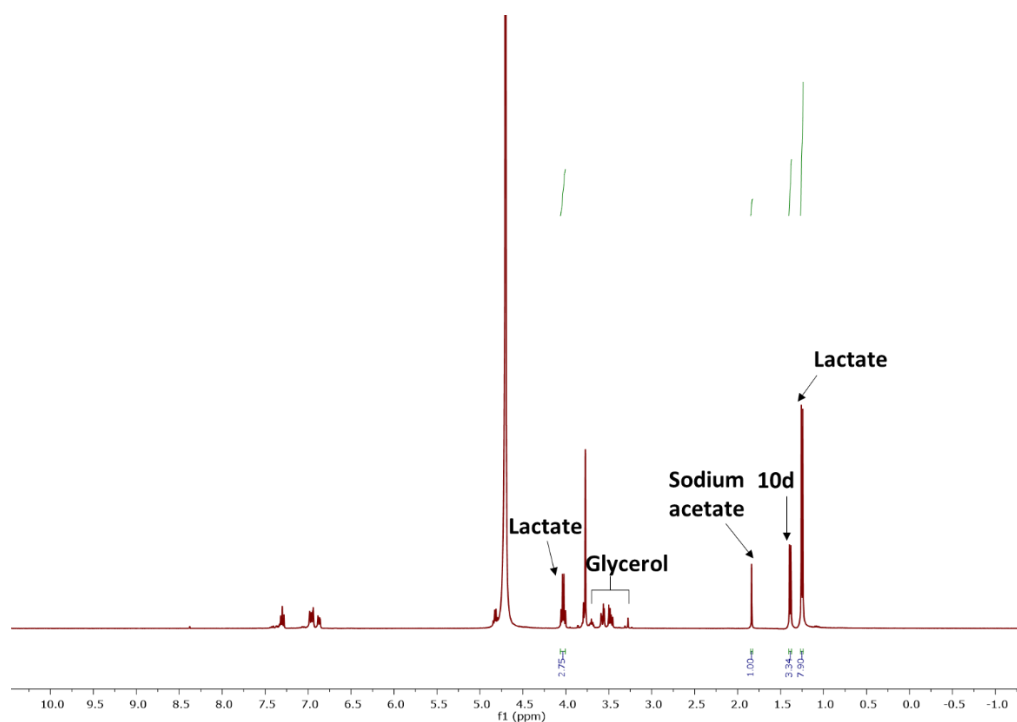

**Figure S62.** <sup>1</sup>H NMR spectrum of glycerol (**7**) dehydrogenation to lactate (**9**) using 3-methoxy acetophenone (**8d**) as acceptor, catalyzed by **6d** (0.5 mol%), NaOH (1 equiv.) at 140 °C in D<sub>2</sub>O. (Entry 4, Table 2)

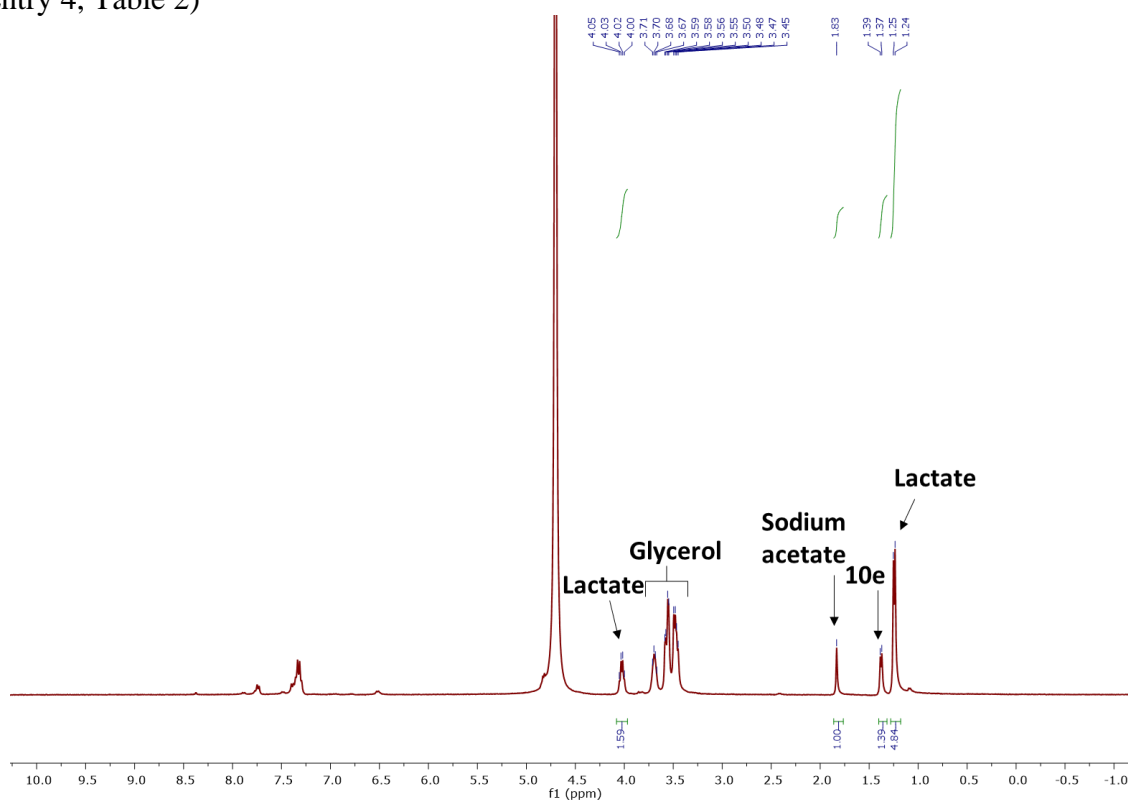

**Figure S63.** <sup>1</sup>H NMR spectrum of glycerol (**7**) dehydrogenation to lactate (**9**) using 4-chloro acetophenone (**8e**) as acceptor, catalyzed by **6d** (0.5 mol%), NaOH (1 equiv.) at 140 °C in D<sub>2</sub>O. (Entry 5, Table 2)

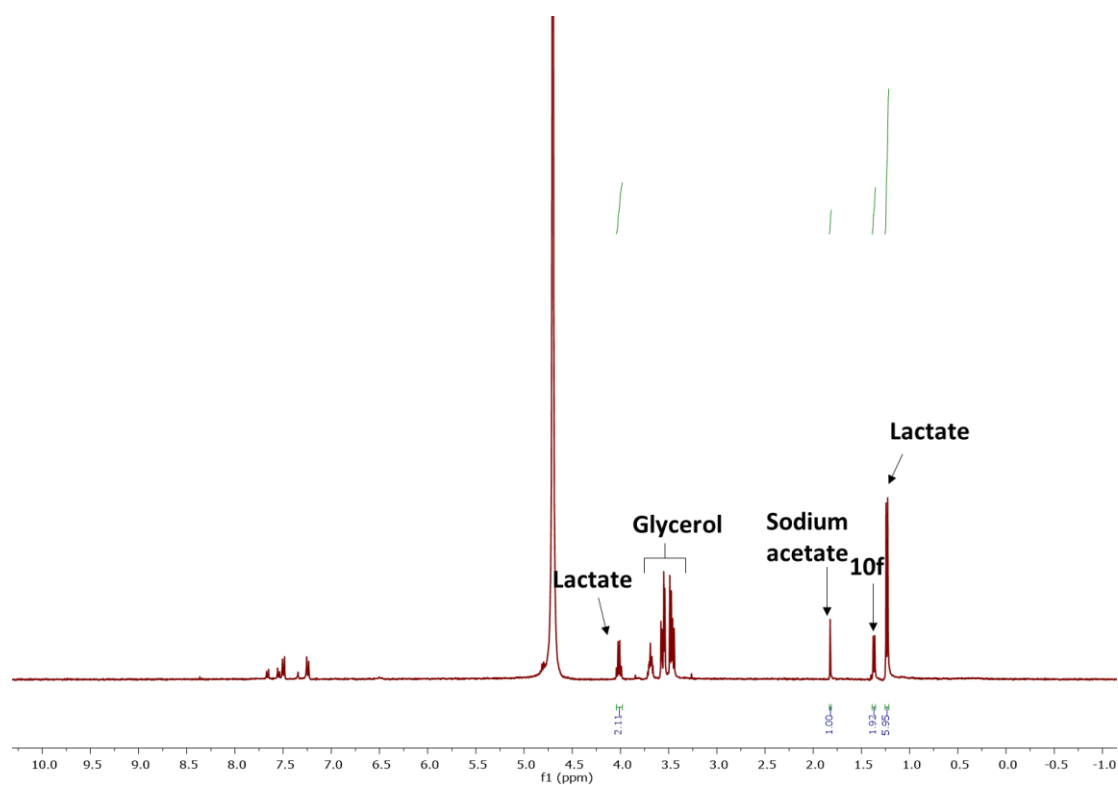

**Figure S64.** <sup>1</sup>H NMR spectrum of glycerol (**7**) dehydrogenation to lactate (**9**) using 4-bromoacetophenone (**8f**) as acceptor, catalyzed by **6d** (0.5 mol%), NaOH (1 equiv.) at 140 °C in D<sub>2</sub>O. (Entry 6, Table 2)

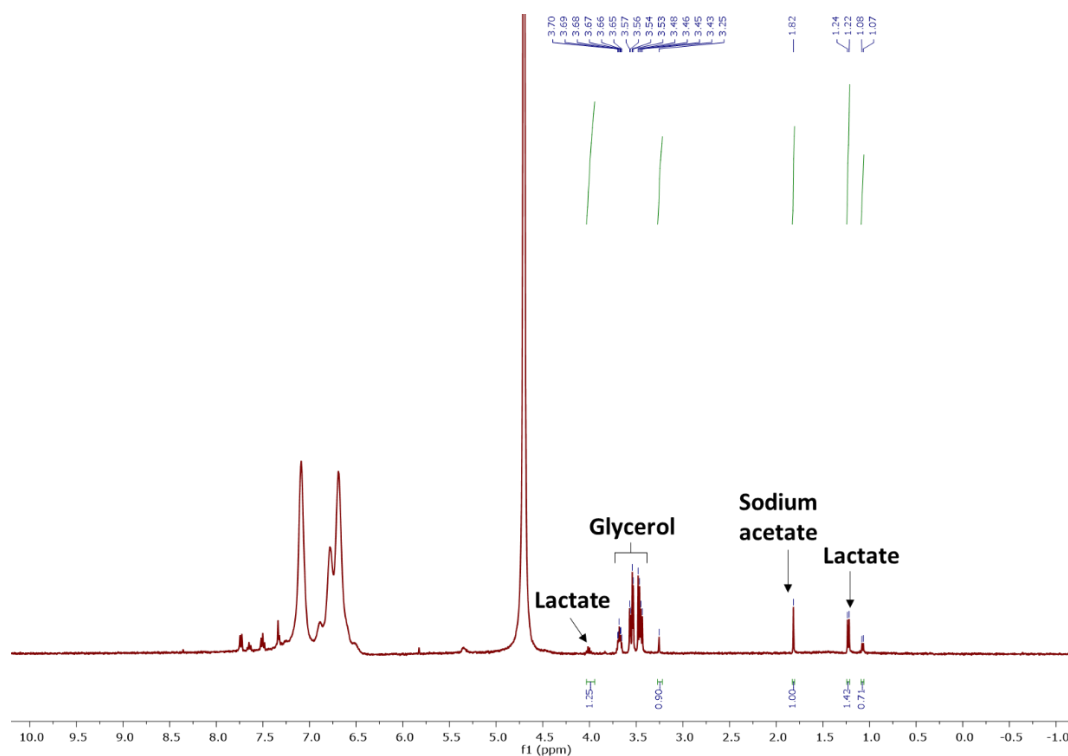

**Figure S65.** <sup>1</sup>H NMR spectrum of glycerol (**7**) dehydrogenation to lactate (**9**) using benzophenone (**8h**) as acceptor, catalyzed by **6d** (0.5 mol%), NaOH (1 equiv.) at 140 °C in D<sub>2</sub>O. (Entry 8, Table 2)

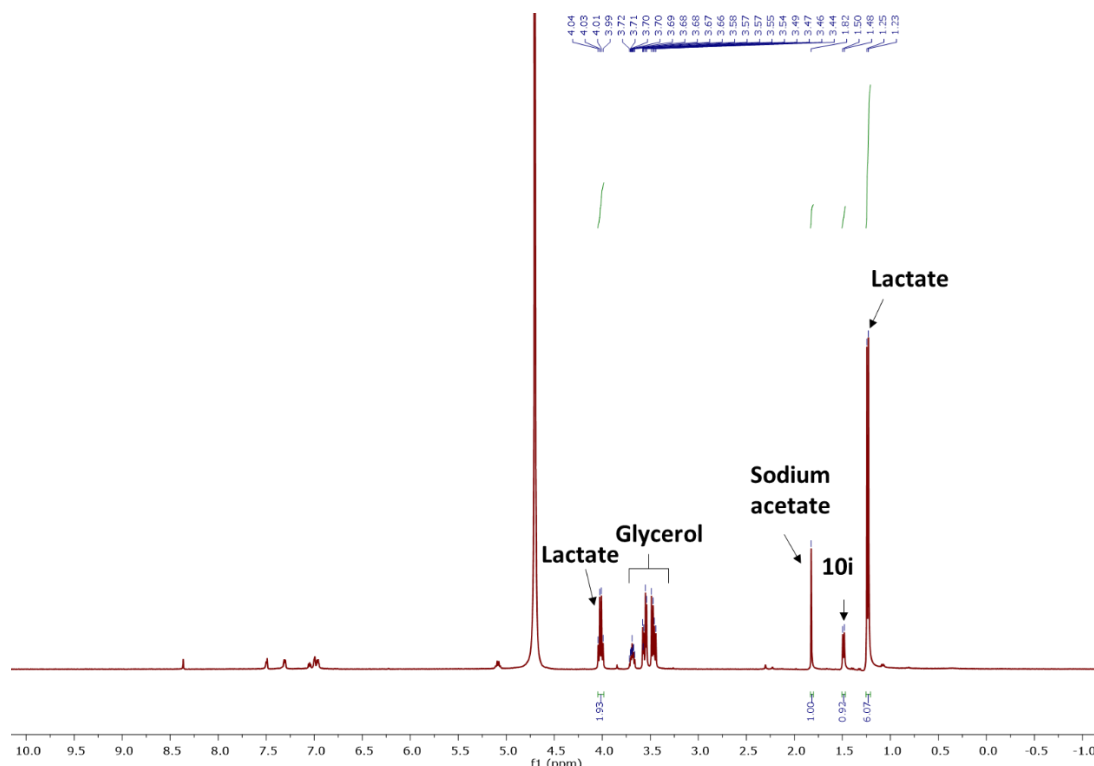

**Figure S66.** <sup>1</sup>H NMR spectrum of glycerol (**7**) dehydrogenation to lactate (**9**) using 2-acetyl thiophene (**8i**) as acceptor, catalyzed by **6d** (0.5 mol%), NaOH (1 equiv.) at 140 °C in D<sub>2</sub>O. (Entry 9, Table 2)

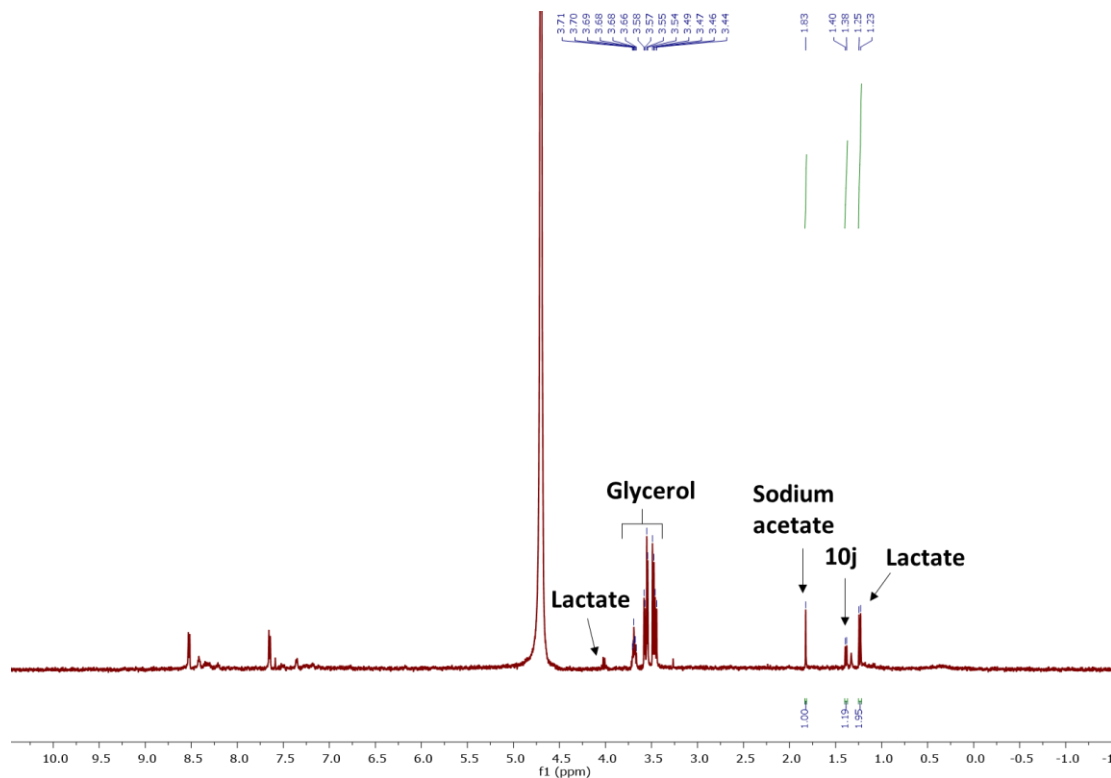

**Figure S67.** <sup>1</sup>H NMR spectrum of glycerol (**7**) dehydrogenation to lactate (**9**) using 4-acetyl pyridine (**8j**) as acceptor, catalyzed by **6d** (0.5 mol%), NaOH (1 equiv.) at 140 °C in D<sub>2</sub>O. (Entry 10, Table 2)

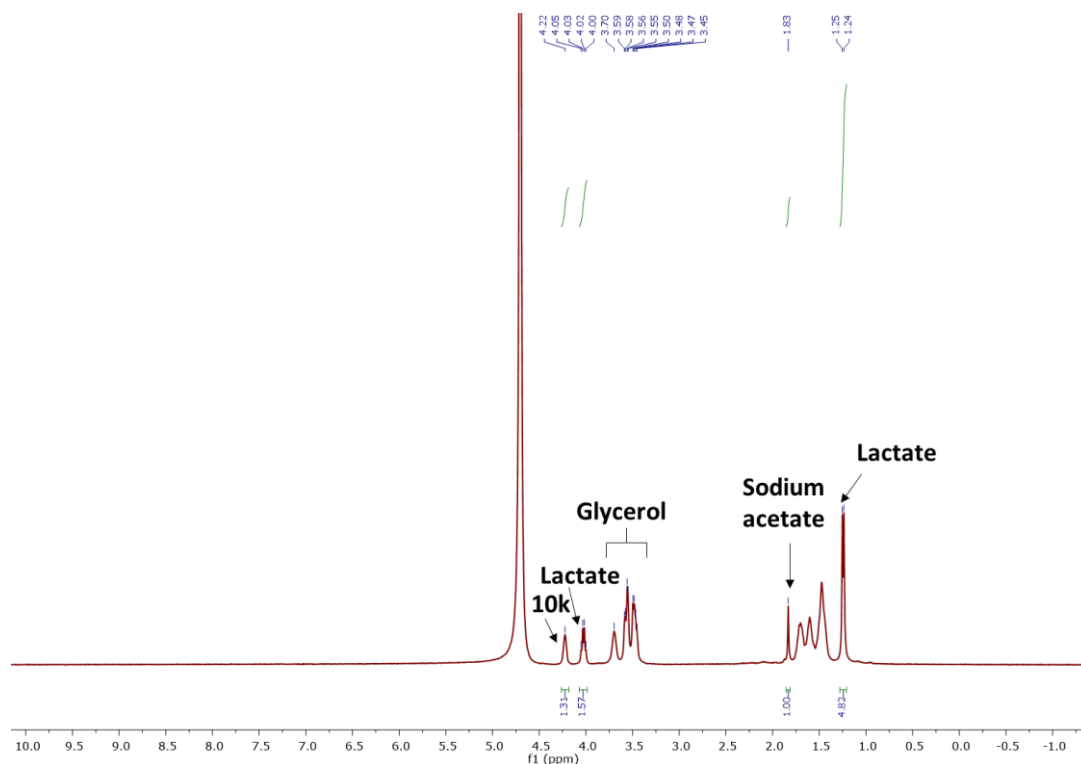

**Figure S68.** <sup>1</sup>H NMR spectrum of glycerol (**7**) dehydrogenation to lactate (**9**) using cyclopentanone (**8k**) as acceptor, catalyzed by **6d** (0.5 mol%), NaOH (1 equiv.) at 140 °C in D<sub>2</sub>O. (Entry 11, Table 2)

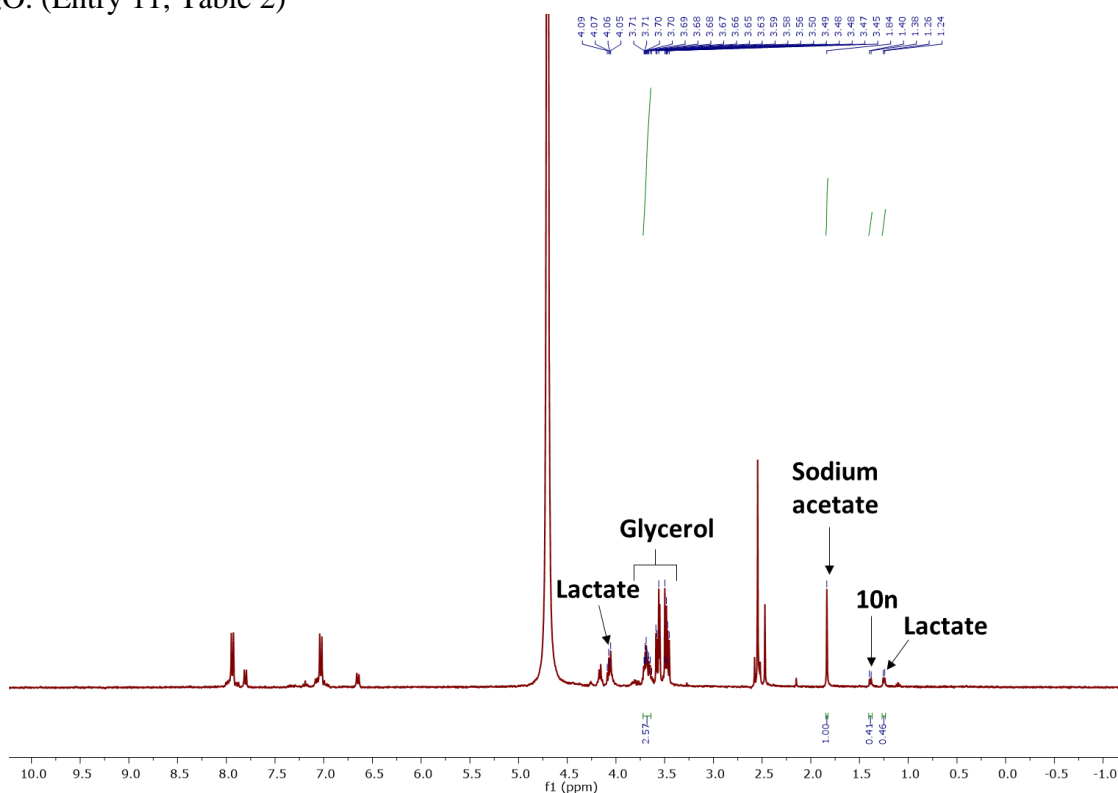

**Figure S69.** <sup>1</sup>H NMR spectrum of glycerol (**7**) dehydrogenation to lactate (**9**) using 4-fluoroacetophenone (**8n**) as acceptor, catalyzed by **6d** (0.5 mol%), NaOH (1 equiv.) at 140 °C in D<sub>2</sub>O. (Entry 14, Table 2)

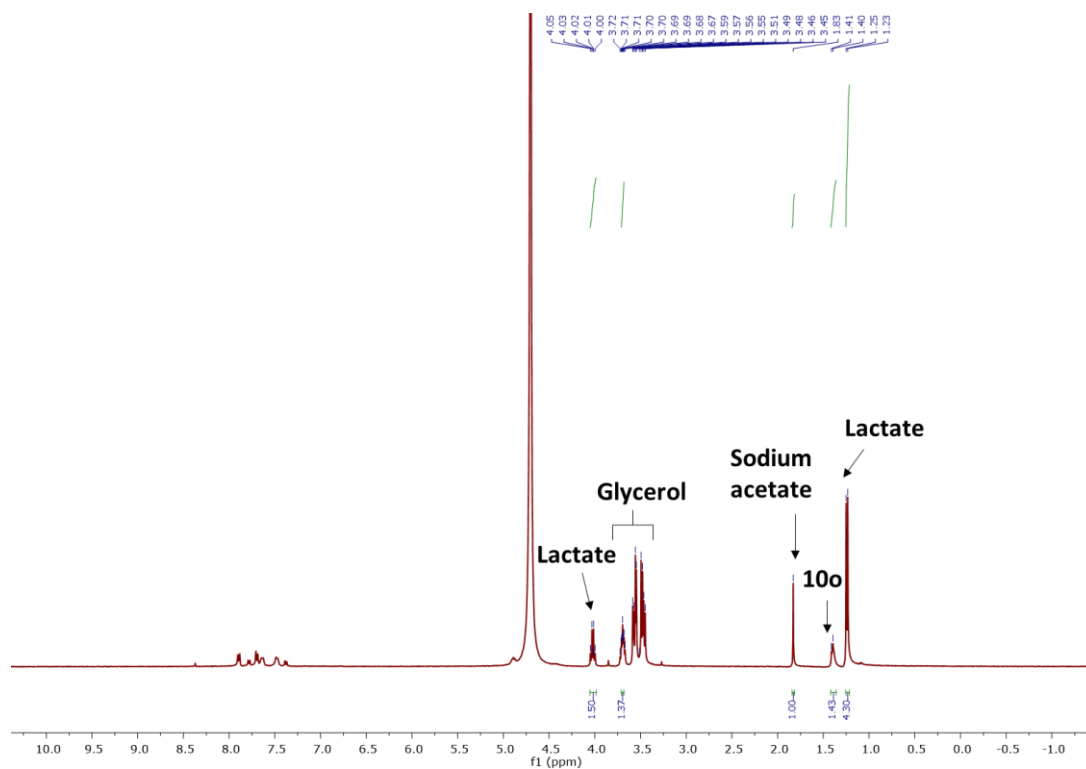

**Figure S70.** <sup>1</sup>H NMR spectrum of glycerol (7) dehydrogenation to lactate (9) using 4-trifluoromethyl acetophenone (8o) as acceptor, catalyzed by 6d (0.5 mol%), NaOH (1 equiv.) at 140 °C in D<sub>2</sub>O. (Entry 15, Table 2)

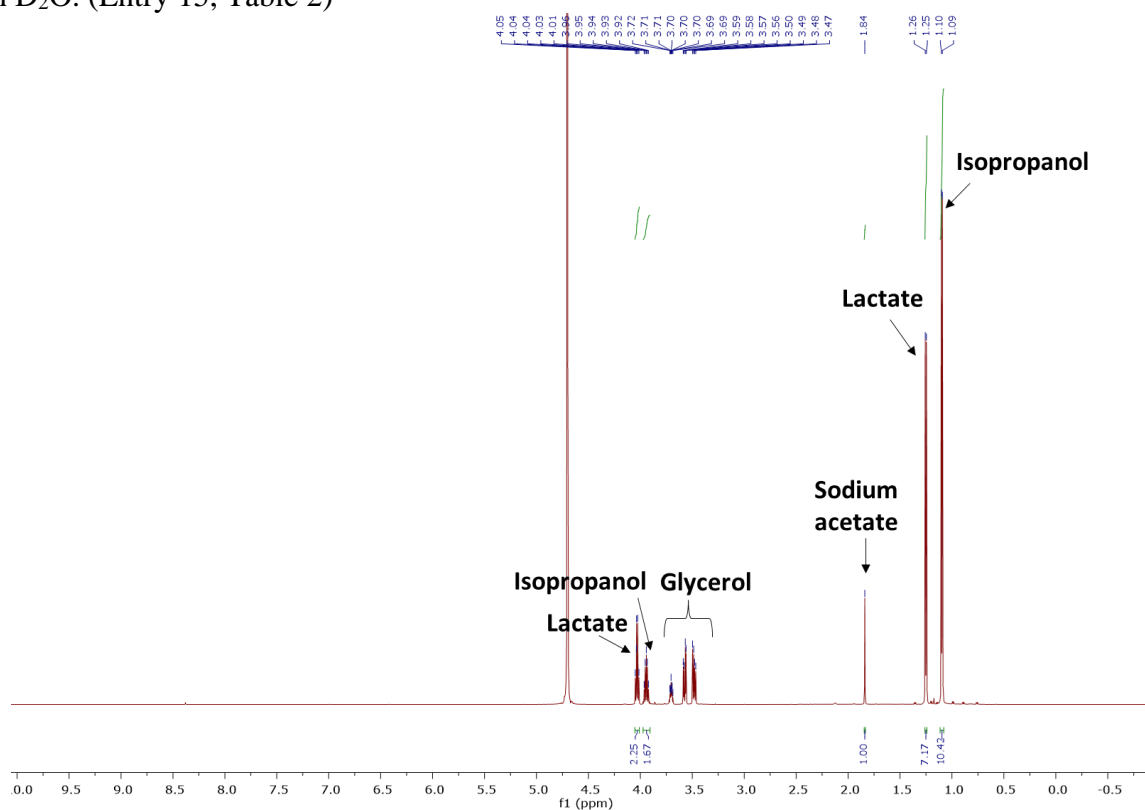

**Figure S71.** <sup>1</sup>H NMR spectra of glycerol (7) dehydrogenation to lactate (9), catalyzed by 6d (0.5 mol%), NaOH (1 equiv.), in the presence of 0.5 mol% of PPh<sub>3</sub> at 140 °C in D<sub>2</sub>O. (Scheme 2, equation 2).



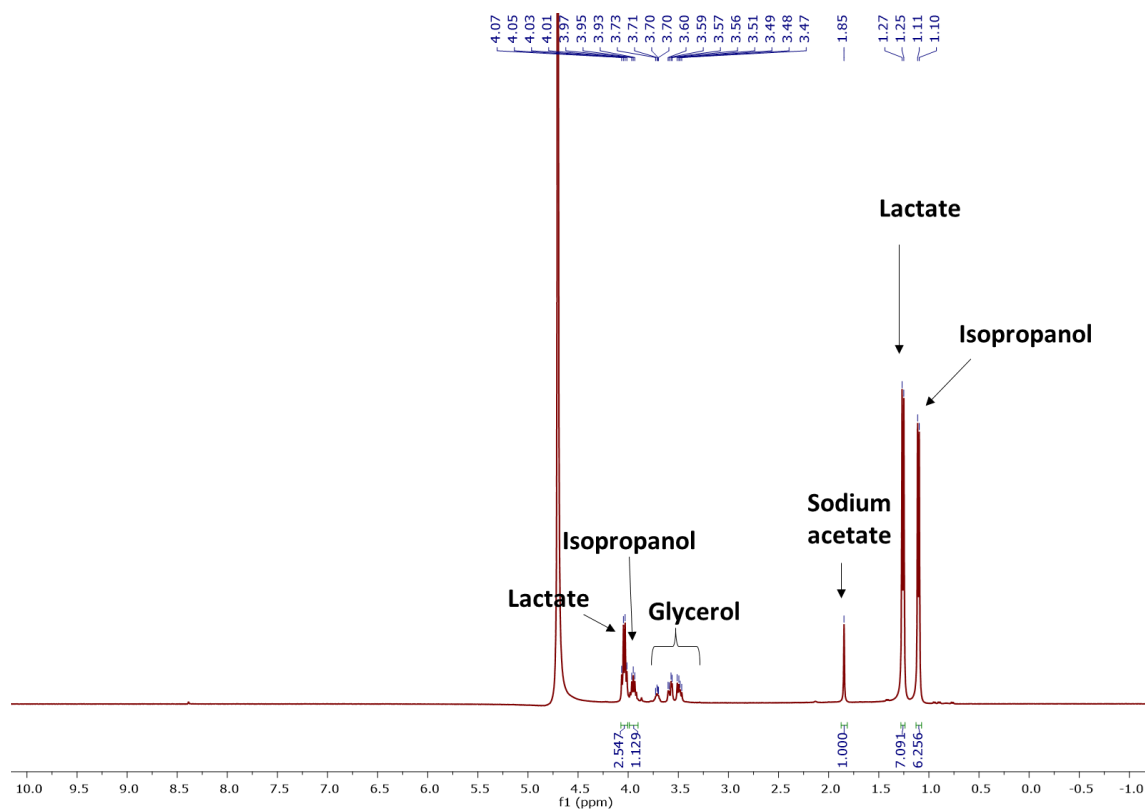

**Figure S72.**  $^1\text{H}$  NMR spectra of glycerol (**7**) dehydrogenation to lactate (**9**), catalyzed by **6d** (2.5 mol%), NaOH (1 equiv.), in the presence of 0.5 mol% of  $\text{PPh}_3$  at 140 °C in  $\text{D}_2\text{O}$ . (Scheme 2, equation 3).

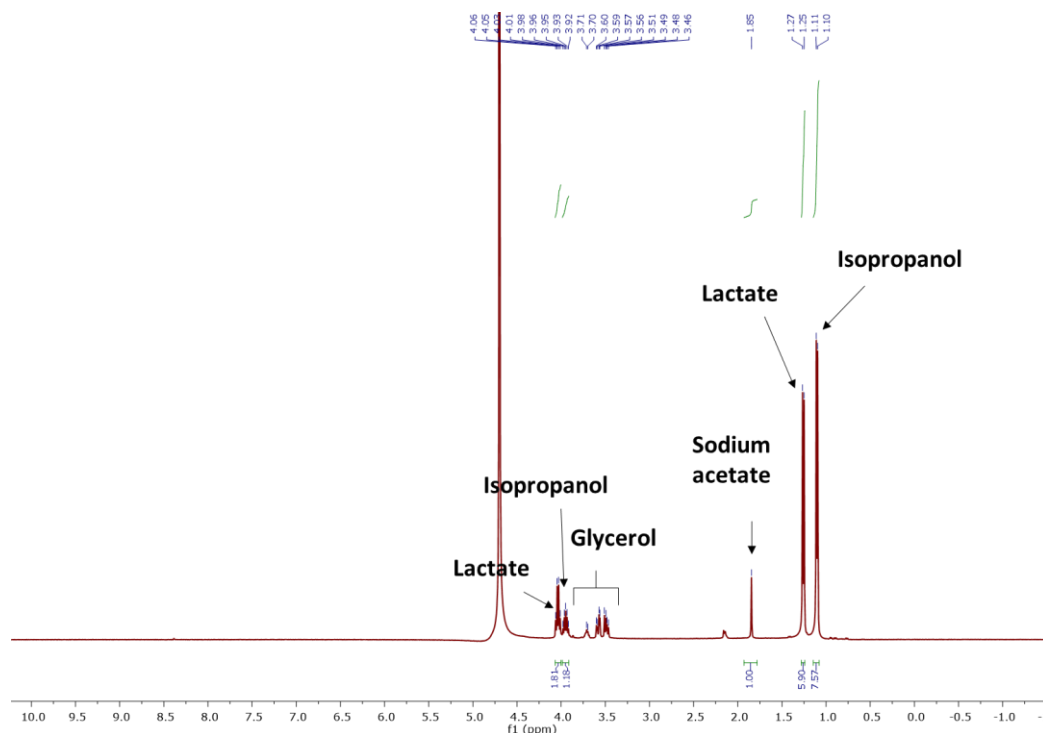

**Figure S73.**  $^1\text{H}$  NMR spectra of glycerol (**7**) dehydrogenation to lactate (**9**), catalyzed by **6d** (0.5 mol%), NaOH (1 equiv.), in the presence of 0.5 mol% of  $\text{CS}_2$  at 140 °C in  $\text{D}_2\text{O}$ . (Scheme 2, equation 4).

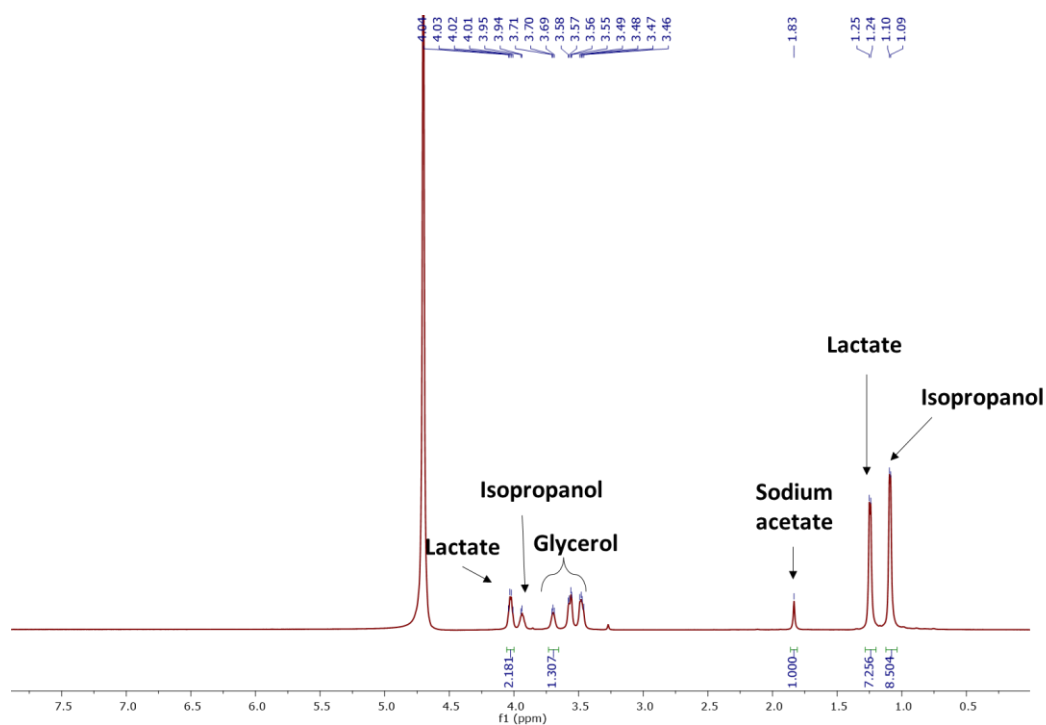

**Figure S74.**  $^1\text{H}$  NMR spectra of glycerol (**7**) dehydrogenation to lactate (**9**), catalyzed by **6d** (0.5 mol%), NaOH (1 equiv.), in the presence of 2.5 mol% of  $\text{CS}_2$  at 140 °C in  $\text{D}_2\text{O}$ . (Scheme 2, equation 5).

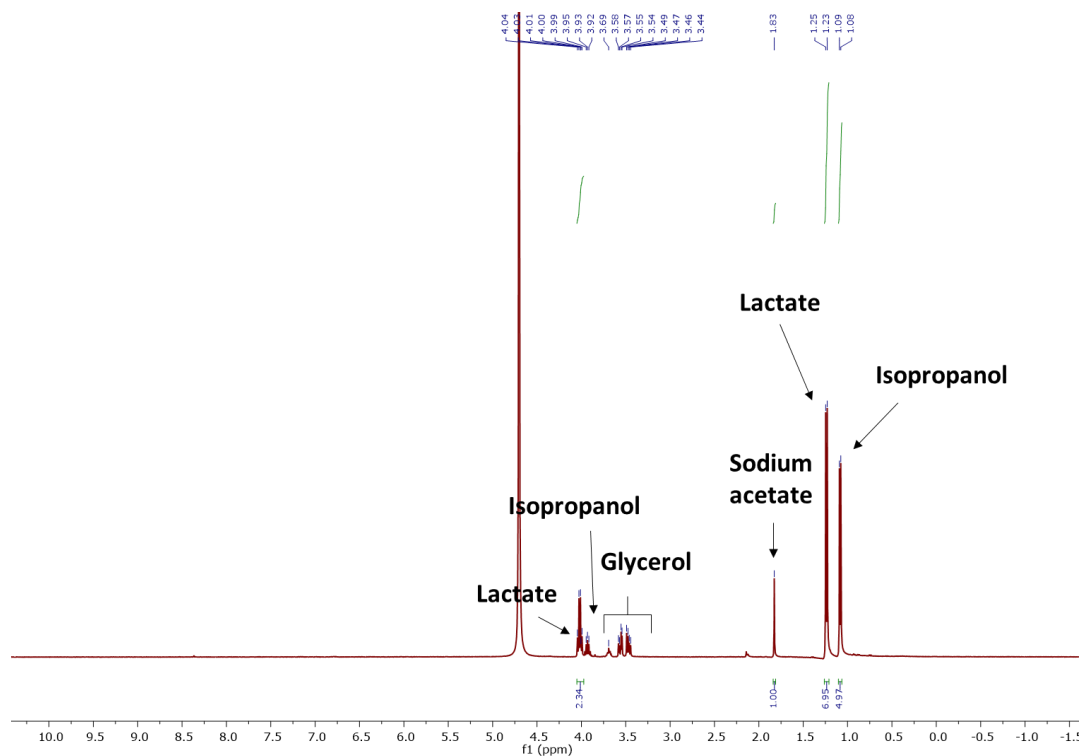

**Figure S75.**  $^1\text{H}$  NMR spectra of glycerol (**7**) dehydrogenation to lactate (**9**), catalyzed by **6d** (0.5 mol%), NaOH (1 equiv.), in the presence of excess Hg at 140 °C in  $\text{D}_2\text{O}$ . (Scheme 2, equation 6).

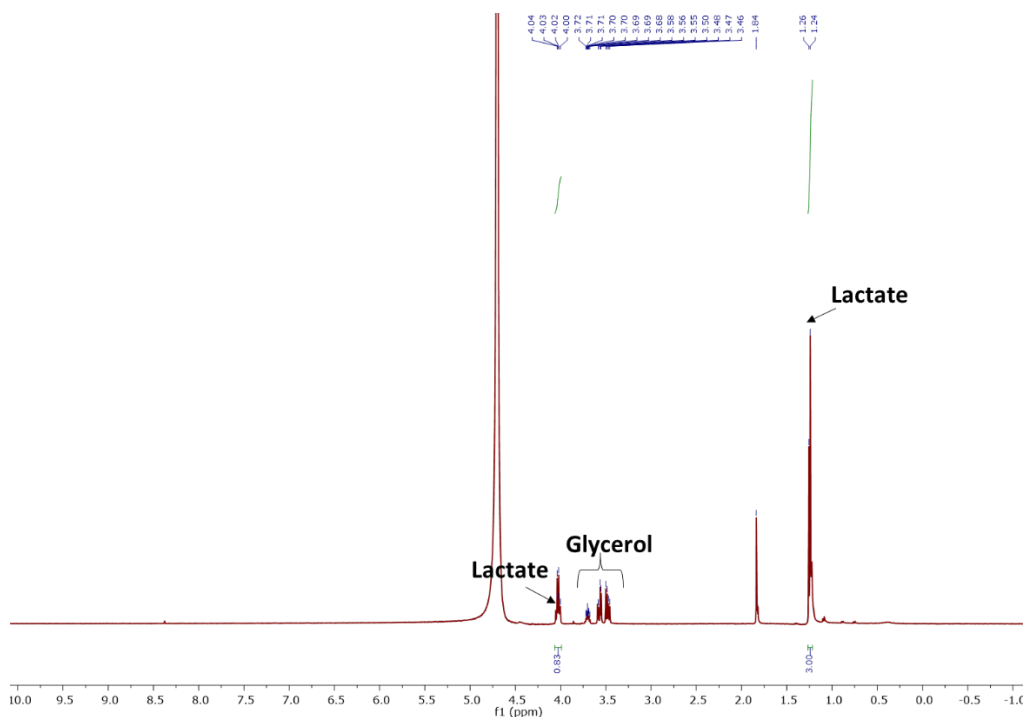

**Figure S76.**  $^1\text{H}$  NMR spectra of deuterium labelling experiment of glycerol (**7**) transfer dehydrogenation to lactate (**9**) catalyzed by 0.5 mol% **6d**, 1 equivalent NaOH using acetone as hydrogen acceptor, at 140 °C. (Scheme 2, equation 7).

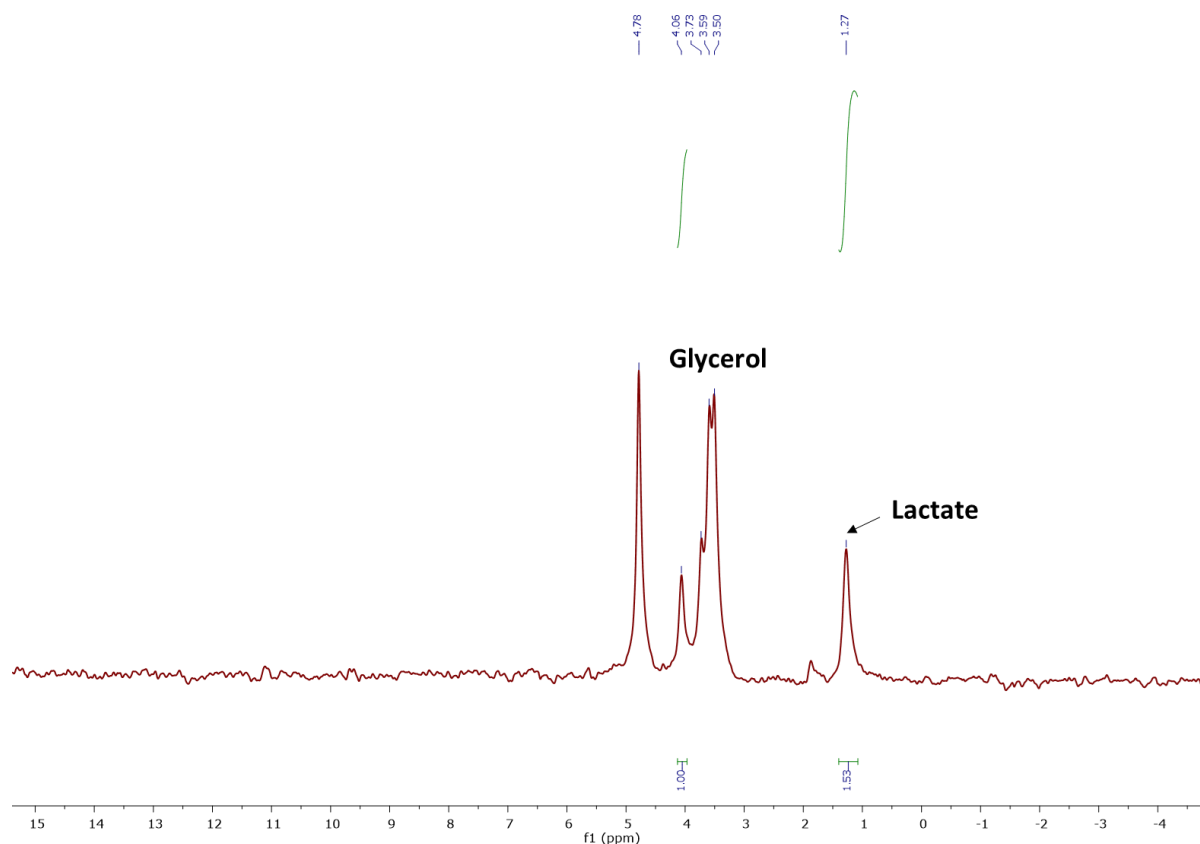

**Figure S77.**  $^2\text{H}$  NMR spectra of deuterium labelling experiment of glycerol (**7**) transfer dehydrogenation to lactate (**9**) catalyzed by 0.5 mol% **6d**, 1 equivalent NaOH using acetone as hydrogen acceptor, at 140 °C. (Scheme 2, equation 7).

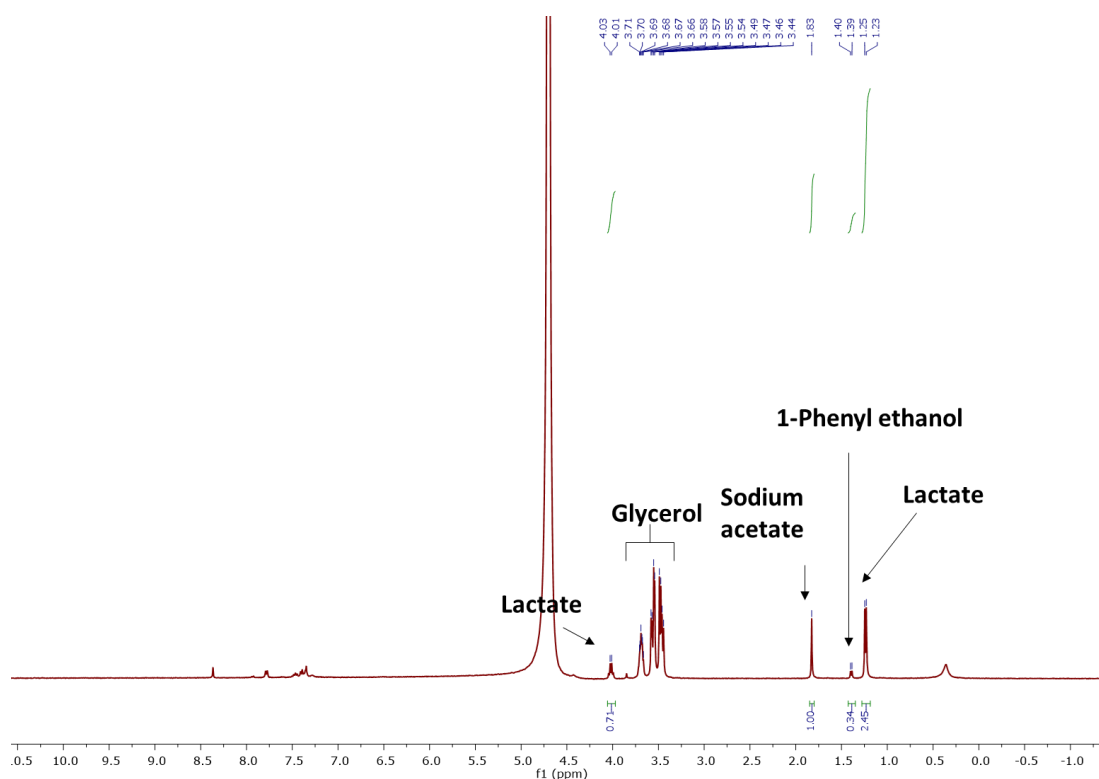

**Figure S78.**  $^1\text{H}$  NMR spectra of glycerol (**7**) dehydrogenation to lactate (**9**), using acetophenone (**8a**) as acceptor catalyzed by **6d** (0.5 mol%), NaOH (1 equiv.), under open vessel condition at 140 °C in  $\text{D}_2\text{O}$ . (Scheme 2, equation 8).

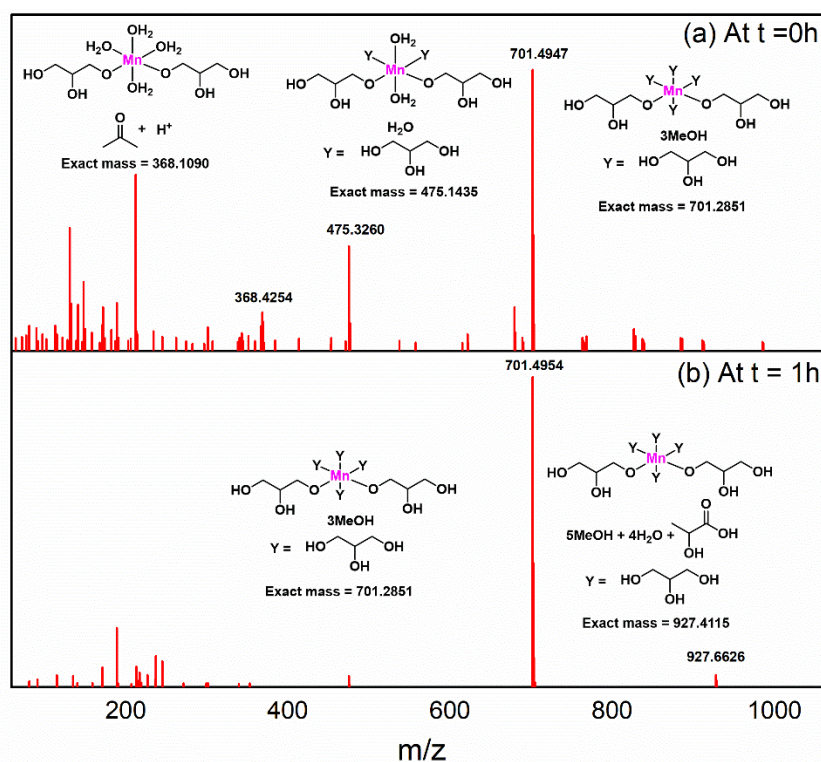

**Figure S79.** HRMS analysis of reaction mixture obtained from the  $\text{MnCl}_2 \cdot 4\text{H}_2\text{O}$  catalyzed transfer dehydrogenation of glycerol under the optimized conditions at (a)  $t = 0\text{h}$  and (b)  $t = 1\text{h}$ .
